# Supplementary material for: Uncertainties in long-term geologic offset rates of faults: General principles illustrated with data from California and other western states
Source: Oxford University Press journal article supplement (doi:10.1130/ges00127.1), 2007-01-01
Supplement: references_cited_Table_1.doc [file references_cited_Table_1.doc]

REFERENCES CITED IN TABLE 1

Abbott, P.L., and Smith, T.E., 1989, Sonora, Mexico, source for the Eocene Poway Conglomerate of southern California: Geology, v. 17, p. 329–332, doi: 10.1130/0091-7613(1989)017<0329:SMSFTE>2.3.CO;2.

Addicott, W.A., 1969, Late Pliocene mollusks from San Francisco Peninsula, California, and their paleogeographic significance: California Academy of Sciences Proceedings, fourth series, v. 37, p. 57–93.

Allen, C.R., Silver, L.T., and Stehli, F.G., 1960, Agua Blanca fault: A major transverse structure of northern Baja California, Mexico: Geological Society of America Bulletin, v. 71, p. 457–482.

Andrews, D.J., Oppenheimer, D.H., and Lienkaemper, J.J., 1993, The Mission link between the Hayward and Calaveras faults: Journal of Geophysical Research, v. 98, p. 12,083–12,095.

Armstrong, F.C., and Oriel, S.S., 1965, Tectonic development of Idaho-Wyoming thrust belt: American Association of Petroleum Geologists Bulletin, v. 49, p. 1847–1866.

Axen, G.J., Wernicke, B.P., Skelly, M.F., and Taylor, W.J., 1990, Mesozoic and Cenozoic tectonics of the Sevier thrust belt in the Virgin River Valley area, southern Nevada, *in* Wernicke, B.P., ed., Basin and Range extensional tectonics near the latitude of Las Vegas, Nevada: Geological Society of America Memoir 176, p. 123–154.

Axen, G.J., Taylor, W.J., and Bartley, J.M., 1993, Space-time patterns and tectonic models of Tertiary extension and magmatism in the Great Basin of the western United States: Geological Society of America Bulletin, v. 105, p. 56–76, doi: 10.1130/0016-7606(1993)105<0056:STPATC>2.3.CO;2.

Bachman, S.B., 1974, Depositional and structural history of the Waucobi Lakebed deposits, Owens Valley, California [M.S. thesis]: Los Angeles, University of California, 129 p.

Baker, R.A., 1984, Stratigraphy and depositional history of the Pantano Formation (Oligocene-early Miocene), Pima County, Arizona [M.S. thesis]: Tucson, University of Arizona.

Baldridge, W.S., Ferguson, J.F., Braile, L.W., Wang, B., Eckhardt, K., Evans, D., Schultz, C., Gilpin, B., Jiracek, G.R., and Biehler, S., 1994, The western margin of the Rio Grande rift in northern New Mexico: An aborted boundary?: Geological Society of America Bulletin, v. 106, p. 1538–1551, doi: 10.1130/0016-7606(1994)106<1538:TWMOTR>2.3.CO;2.

Baldwin, J.N., Nelson, K.I., and Randolph, C.E., 2000, Late Quaternary fold deformation along the Northridge Hills fault, Northridge, California: Deformation coincident with past Northridge blind thrust earthquakes and other nearby structures: Seismological Society of America Bulletin, v. 90, p. 629–642, doi: 10.1785/0119990056.

Barlow, J.A., Jr., 1955, Structure of the Rawlins Uplift, Carbon County, Wyoming, *in* Anderman, G.G., ed., Green River Basin: Wyoming Geological Association 10th Annual Guidebook, p. 138–139.

Barrows, A.G., Kahle, J.E., and Beeby, D.J., 1985, Earthquake hazards and tectonic history of the San Andreas fault zone, Los Angeles County, California: California Division of Mines and Geology Open-File Report 85–10LA, 236 p.

Bartholomew, M.J., 1970, San Jacinto fault zone in the northern Imperial valley, California: Geological Society of America Bulletin, v. 81, p. 3161–3166, doi: 10.1130/0016-7606(1970)81[3161:SJFZIT]2.0.CO;2.

Bartley, J.M., and Glazner, A.F., 1991, En echelon Miocene rifting in the southwestern United States and model for vertical-axis rotation in continental extension: Geology, v. 19, p. 1165–1168, doi: 10.1130/0091-7613(1991)019<1165:EEMRIT>2.3.CO;2.

Bartley, J.M., Glazner, A.F., and Schermer, E.R., 1990, North-south contraction of the Mojave block and strike-slip tectonics in southern California: Science, v. 248, p. 1398–1401, doi: 10.1126/science.248.4961.1398.

Bloch, R.B., Von Huene, R., Hart, P.E., and Wentworth, C.M., 1993, Style and magnitude of tectonic shortening normal to the San Andreas fault across Pyramid Hills and Kettleman Hills South Dome, California: Geological Society of America Bulletin, v. 105, p. 464–478, doi: 10.1130/0016-7606(1993)105<0464:SAMOTS>2.3.CO;2.

Bohannon, R.G., 1975, Mid-Tertiary conglomerates and their bearing on Transverse Range tectonics, southern California: California Division of Mines and Geology Special Report, v. 118, p. 75–82.

Bohannon, R.G., and Howell, D.G., 1982, Kinematic evolution of the junction of the San Andreas, Garlock, and Big Pine faults, California: Geology, v. 10, p. 358–363, doi: 10.1130/0091-7613(1982)10<358:KEOTJO>2.0.CO;2.

Bohannon, R.G., Grow, J.A., Miller, J.J., and Blank, R.H., Jr., 1993, Seismic stratigraphy and tectonic development of Virgin River depression and associated basins, southeastern Nevada and northwestern Arizona: Geological Society of America Bulletin, v. 105, p. 501–520, doi: 10.1130/0016-7606(1993)105<0501:SSATDO>2.3.CO;2.

Borchardt, G., 1993, Holocene slip rate of the Hayward fault, Union City, California, *in* Jacobsen, M.L, ed., National Earthquake Hazards Reduction Program, Summaries of Technical Reports, Volume XXXIV: U.S. Geological Survey Open-File Report 93-195, p. 209–213.

Borchardt, G., Snyder, D.L., and Wills, C.J., 1999, Holocene slip rate of the Concord fault at Galindo Creek in Concord, California: Menlo Park, California, U.S. Geological Survey, Final Technical Report, Contract 1434-HQ-97-GR-03102, 30 p.

Bourgeois, J., and Dott, R.H., Jr., 1985, Stratigraphy and sedimentology of Upper Cretaceous rocks in coastal southwest Oregon: Evidence for wrench-fault tectonics in a postulated accretionary terrane: Geological Society of America Bulletin, v. 96, p. 1007–1019, doi: 10.1130/0016-7606(1985)96<1007:SASOUC>2.0.CO;2.

Brown, R.D., Jr., 1990, Quaternary deformation, *in* Wallace, R.E., ed., The San Andreas fault system, California: U.S. Geological Survey Professional Paper 1515, p. 83–113.

Budding, K.E., Schwartz, D.P., and Oppenheimer, D.H., 1991, Slip rate, earthquake recurrence, and seismogenic potential of the Rodgers Creek fault zone, northern California: Initial results: Geophysical Research Letters, v. 18, p. 447–450.

Buesch, D.C., and Ehlig, P.L., 1982, Structural and lower Miocene volcanic rock correlation between Soledad Pass and Salton Wash along the San Andreas fault: Geological Society of America Abstracts with Programs, v. 14, p. 153.

Burchfiel, B.C., Hodges, K.V., and Royden, L.H., 1987, Geology of Panamint Valley–Saline Valley pull-apart system, California: Palinspastic evidence for low-angle geometry of a Neogene range-bounding fault: Journal of Geophysical Research, v. 92, p. 10,422–10,426.

Burke, D.B., and Clark, M.M., 1978, Late Quaternary activity along the Garlock fault at Koehn Lake, California: Eos (Transactions, American Geophysical Union), v. 59, p. 1126.

Byrd, J.O.D., Smith, R.B., and Geissman, J.W., 1994, The Teton fault, Wyoming: Topographic signature, neotectonics, and mechanisms of deformation: Journal of Geophysical Research, v. 99, p. 20,095–20,122, doi: 10.1029/94JB00281.

California Division of Oil and Gas, 1961, California oil and gas fields, maps and data sheets, part 2, Los Angeles-Ventura basins and central coastal regions: San Francisco, California Division of Oil and Gas, p. 496–913.

Callender, J.F., and Zilinski, R.E., Jr., 1976, Kinematics of Tertiary and Quaternary deformation along the eastern edge of the Lucero uplift, central New Mexico, *in* Woodward, L.A., and Northrop, S.A., eds., Tectonics and mineral resources of southwestern North America: New Mexico Geological Society Special Publication 6, p. 53–61.

Cao, T., Bryant, W.A., Rowshandel, B., Branum, D., and Wills, C.J., 2003, The revised 2002 California probabilistic seismic hazard maps June 2003: http://www.consrv.ca.gov/CGS/rghm/psha/

Carter, B., 1982, Neogene displacement on the Garlock fault, California: Eos (Transactions, American Geophysical Union), v. 63, p. 1124.

Cather, S.M., 1990, Stress and volcanism in the northern Mogollon-Datil volcanic field, New Mexico: Effects of post-Laramide tectonic transition: Geological Society of America Bulletin, v. 102, p. 1447–1458, doi: 10.1130/0016-7606(1990)102<1447:SAVITN>2.3.CO;2.

Cemen, I., and Wright, L.A., 1990, Effect of Cenozoic extension on Mesozoic thrust surfaces in the central and southern Funeral Mountains, Death Valley, California, *in* Wernicke, B.P., ed., Basin and Range extensional tectonics near the latitude of Las Vegas, Nevada: Geological Society of America Memoir 176, p. 305–316.

Chamberlin, R.M., 1983a, Cenozoic domino-style crustal extension in the Lemitar Mountains, New Mexico: A summary, *in* Chapin, C.E., and Callender, J.F., eds., Socorro region II: New Mexico Geological Society Guidebook 34, p. 111–118.

Chamberlin, R.M., 1983b, Stop 4 discussion, *in* Second Day Road Log, *in* Chapin, C.E., and Callender, J.F., eds., Socorro region II: New Mexico Geological Society Guidebook 34, p. 51–53.

Chapin, C.E., and Seager, W.R., 1975, Evolution of the Rio Grande rift in the Socorro and Las Cruces area, in Seager, W.R., et al., eds., Las Cruces country: New Mexico Geological Society Guidebook 26, p. 297–321.

Chase, C.G., and Wallace, T.C., 1986, Uplift of the Sierra Nevada of California: Geology, v. 14, p. 730–733, doi: 10.1130/0091-7613(1986)14<730:UOTSNO>2.0.CO;2.

Christensen, M.N., 1966, Late Cenozoic crustal movements in the Sierra Nevada of California: Geological Society of America Bulletin, v. 77, p. 163–182, doi: 10.1130/0016-7606(1966)77[163:LCCMIT]2.0.CO;2.

Christiansen, R.L., and Yeats, R.S., 1992, Post-Laramide geology of the U.S. Cordilleran region, *in* Burchfiel, B.C., et al., eds., The Cordilleran orogen: Conterminous U.S.: Boulder, Colorado, Geological Society of America, Geology of North America, v. G-3, p. 261–406.

Clark, M.N., 1979, Quaternary faulting in southern California: Summaries of Technical Reports, National Earthquake Hazards Reduction Program: U.S. Geological Survey Open-File Report 79-8, p. 16–17.

Clark, M.N., Lienkaemper, J.J., Harwood, D.S., Lajoie, K.R., Matti, J.C., Perkins, J.A., Rymer, M.J., Sarna-Wojcicki, A.M., Sharp, R.V., Sims, J.D., Tinsley, J.C., and Ziony, J.I., 1984, Preliminary slip-rate table and map for late Quaternary faults of California: U.S. Geological Survey Open-File Report 84-106, scale 1:1,000,000, 13 p.

Cole, M.R., and Armentrout, J.M., 1979, Neogene paleogeography of the western United States, *in* Armentrout, J.M., et al., eds., Cenozoic paleogeography of the western United States: Los Angeles, Pacific Section, Society of Economic Paleontologists and Mineralogists, p. 297–323.

Constenius, K.N., 1996, Late Paleogene extensional collapse of the Cordilleran foreland fold and thrust belt: Geological Society of America Bulletin, v. 108, p. 20–39, doi: 10.1130/0016-7606(1996)108<0020:LPECOT>2.3.CO;2.

Crone, A.J., and Machette, M.N., 1997, Investigations of Quaternary faulting in the stable interior of the west-central United States: Denver, Colorado, U.S. Geological Survey, Annual Project Summaries, v. 37.

Crouch, J.K., and Suppe, J., 1993, Late Cenozoic tectonic evolution of the Los Angeles basin and inner California borderland: A model for core complex-like crustal extension: Geological Society of America Bulletin, v. 105, p. 1415–1434, doi: 10.1130/0016-7606(1993)105<1415:LCTEOT>2.3.CO;2.

Crowell, J.C., 1975, The San Andreas fault in southern California: California Division of Mines and Geology Special Report, v. 118, p. 7–27.

Crowell, J.C., and Sylvester, A.G., 1979, Tectonics of the juncture between the San Andreas fault system and the Salton Trough, southeastern California: Department of Geological Sciences, University of California, Santa Barbara, 193 p.

Cummings, J.C., 1968, The Santa Clara Formation and possible post-Pliocene slip on the San Andreas fault in Central California, *in* Dickinson, W.R., and Grantz, A., eds., Proceedings of the Conference on Geologic Problems of the San Andreas Fault System: Stanford University Publications in Geological Sciences, v. 11, p. 191–207.

Davis, G.A., and Burchfiel, B.C., 1973, Garlock fault of southern California: An intracontinental transform structure: Geological Society of America Bulletin, v. 84, p. 1407–1422, doi: 10.1130/0016-7606(1973)84<1407:GFAITS>2.0.CO;2.

Davis, T.L., and Namson, J.S., 1994, A balanced cross-section of the 1994 Northridge earthquake, southern California: Nature, v. 372, p. 167–169, doi: 10.1038/372167a0.

De la Montagne, J., 1953, Late Tertiary normal faults along the east flank of the Park Range, Wyoming and Colorado, *in* Blackstone, D.L., Jr., and Van Gilder, H.R., eds., Laramie Basin, Wyoming and North Park, Colorado: Wyoming Geological Association 8th Annual Guidebook, p. 103–105.

DeMets, C., Gordon, R.G., Stein, S., and Argus, D.F., 1987, A revised estimate of Pacific-North America motion and implications for western North America plate boundary zone tectonics: Geophysical Research Letters, v. 14, p. 911–914.

dePolo, C.M., 1998, A reconnaissance technique for estimating the slip rates of normal-slip faults in the Great Basin, and application to faults in Nevada, U.S.A.[Ph.D. thesis]: Reno, University of Nevada, 381 p.

Dibblee, T.W., Jr., 1966, Geology of the central Santa Ynez mountains, Santa Barbara County, California: California Division of Mines and Geology Bulletin 186, 99 p.

Dibblee, T.W., Jr., 1968a, Existence of major lateral displacement on the Pinto Mountain fault, southeastern California: Geological Society of America Special Paper 115, p. 322.

Dibblee, T.W., Jr., 1968b, Geology of the Fremont Peak and Opal Mountain quadrangles, California: California Division of Mines and Geology Bulletin 188, 64 p.

Dibblee, T.W., Jr., 1975, Late Quaternary uplift of the San Bernardino Mountains on the San Andreas and related faults, *in* Crowell, J.C., ed., San Andreas fault in southern California: A guide to San Andreas fault from Mexico to Carrizo Plain: California Division of Mines and Geology Special Report 118, p. 127–146.

Dickinson, W.R., 1979, Cenozoic plate tectonic setting of the Cordilleran region in the United States, *in* Armentrout, J.M., et al., eds., Cenozoic paleogeography of the western United States: Los Angeles, Pacific Section, Society of Economic Paleontologists and Mineralogists, p. 1–13.

Dickinson, W.R., Cowan, D.S., and Schweikert, R.A., 1972, Test of new global tectonics: Discussion: American Association of Petroleum Geologists Bulletin, v. 56, p. 375–384.

Dickinson, W.R., Klute, M.A., Hayes, M.J., Janecke, S.U., Lundin, E.R., McKittrick, M.A., and Olivares, M.D., 1988, Paleogeographic and paleotectonic setting of Laramide sedimentary basins in the central Rocky Mountain region: Geological Society of America Bulletin, v. 100, p. 1023–1039, doi: 10.1130/0016-7606(1988)100<1023:PAPSOL>2.3.CO;2.

Dieterich, J.H., and Working Group on California Earthquake Probabilities, 1990, Probabilities of large earthquakes in the San Francisco Bay region, California: U.S. Geological Survey Circular 1053, 51 p.

Dokka, R.K., and Travis, C.J., 1990, The Eastern California Shear Zone and its role in the tectonic evolution of the Pacific-North American transform boundary: Geological Society of America Abstracts with Programs, v. 22, p. 19.

Dolan, J.F., and Pratt, T.L., 1997, High-resolution seismic reflection profiling of the Santa Monica fault zone, west Los Angeles, California: Geophysical Research Letters, v. 24, p. 2051–2054, doi: 10.1029/97GL01940.

Dolan, J.F., Jordan, F., Rasmussen, G., Stevens, D., Reeder, W., and McFadden, L.M., 1996, Evidence for moderate-sized (Mw 6.5–7.0) paleoearthquakes on the Cucamonga fault, northeastern Los Angeles metropolitan region, California: Eos (Transactions, American Geophysical Union), v. 77, p. 461.

Dolan, J.F., Christofferson, S.A., and Shas, J.H., 2003, Recognition of paleoearthquakes on the Puente Hills blind thrust fault, California: Science, v. 300, p. 115–118, doi: 10.1126/science.1080593.

Dorr, J.A., Jr., Spearing, D.R., and Steidtmann, J.R., 1977, Deformation and deposition between a foreland uplift and an impinging thrust belt: Hoback basin, Wyoming: Geological Society of America Special Paper 177, 82 p.

Durham, D.L., 1965, Evidence of large strike-slip displacement along a fault in the southern Salinas Valley, California: U.S. Geological Survey Professional Paper 525-D, p. D106–D111.

Ehlert, K.W., and Ehlig, P.L., 1977, The polka-dot granite and the rate of displacement on the San Andreas fault in southern California: Geological Society of America Abstracts with Programs, v. 9, p. 415–416.

Engel, A.E.J., and Schultejann, P.A., 1984, Late Mesozoic and Cenozoic tectonic history of south central California: Tectonics, v. 3, p. 659–675.

England, T.D.J., and Calon, T.J., 1991, The Cowichan fold and thrust system, Vancouver Island, southwestern British Columbia: Geological Society of America Bulletin, v. 103, p. 336–362, doi: 10.1130/0016-7606(1991)103<0336:TCFATS>2.3.CO;2.

Epis, R.C., Scott, G.R., Taylor, R.B., and Chapin, C.E., 1976, Cenozoic volcanic, tectonic, and geomorphic features of central Colorado, *in* Epis, R.C., and Weimer, R.J., eds., Studies in Colorado field geology: Colorado School of Mines Professional Contribution, v. 8, p. 323–338.

Fox, K.F., Jr., Fleck, R.J., Curtis, G.H., and Meyer, C.E., 1985, Implications of the northwestardly younging age of the volcanic rocks of west-central California: Geological Society of America Bulletin, v. 96, p. 647–654, doi: 10.1130/0016-7606(1985)96<647:IOTNYA>2.0.CO;2.

Frankel, A., Mueller, C., Barnhard, T., Perkins, D., Leyendecker, E.V., Dickman, N., Hanson, S., and Hopper, M., 1996, National seismic-hazard maps: Documentation June 1996: U.S. Geological Survey Open-File Report 96–532, 41 p.

Freeman, S.T., Heath, E.G., Guptill, P.D., and Waggoner, J.T., 1992, Seismic hazard assessment, Newport-Inglewood fault zone, *in* Pipkin, B.W., and Proctor, R.J., eds., Engineering geology practice in southern California: Association of Engineering Geologists Special Publication 4, p. 211–230.

Frizzell, V.A., Jr., and Brown, R.D., Jr., 1976, Map showing recently active breaks along the Green Valley fault, Napa and Solano Counties, California: U.S. Geological Survey Miscellaneous Field Studies Map MF-743, scale 1:24,000.

Frizzell, V.A., Jr., Mattinson, J.M., and Matti, J.C., 1986, Distinctive Triassic megaporphyritic monzogranite: Evidence for only 160 km offset along the San Andreas fault, southern California: Journal of Geophysical Research, v. 91, p. 14,080–14,088.

Garfunkel, Z., 1974, Model for the late Cenozoic tectonic history of the Mojave Desert, California, and for its relation to adjacent areas: Geological Society of America Bulletin, v. 85, p. 1931–1944, doi: 10.1130/0016-7606(1974)85<1931:MFTLCT>2.0.CO;2.

Gath, E.M., Hansen, J.H., Clark, B.R., and Rockwell, R.K., 1988, The Whittier fault in southern California: Preliminary results of investigations: Eos (Transactions, American Geophysical Union), v. 69, p. 260.

Glen, R.A., 1990, Formation and thrusting in some Great Valley rocks near the Franciscan complex, California, and implications for the tectonic wedging hypothesis: Tectonics, v. 9, p. 1451–1477.

Goldfinger, C., Kulm, L.D., Yeats, R.S., Applegate, B., MacKay, M.E., and Moore, G.F., 1992, Transverse structural trends along the Oregon convergent margin: Implications for Cascadia earthquake potential and crustal rotations: Geology, v. 20, p. 141–144, doi: 10.1130/0091-7613(1992)020<0141:TSTATO>2.3.CO;2.

Gordon, I., and Heller, P.L., 1993, Evaluating major controls on basinal stratigraphy, Pine Valley, Nevada: Implications for syntectonic deposition: Geological Society of America Bulletin, v. 105, p. 47–55, doi: 10.1130/0016-7606(1993)105<0047:EMCOBS>2.3.CO;2.

Graham, S.A., 1978, Role of the Salinian block in the evolution of the San Andreas fault system: American Association of Petroleum Geologists Bulletin, v. 62, p. 2214–2231.

Graham, S.A., 1979, Tertiary paleotectonics and paleogeography of the Salinian block, *in* Armentrout, J.M., et al., eds., Cenozoic paleogeography of the western United States: Los Angeles, Pacific Section, Society of Economic Paleontologists and Mineralogists, p. 45–51.

Graham, S.A., and Dickinson, W.R., 1978, Apparent offsets of on-land geologic features across the San Gregorio-Hosgri Fault trend, *in* Silver, E.A., and Normark, W.R., eds., San Gregorio-Hosgri fault zone, California: California Division of Mines and Geology Special Report 137, p. 13–23.

Graham, S.A., Stanley, R.G., Bent, J.V., and Carter, J.B., 1989, Oligocene and Miocene paleogeography of central California and displacement along the San Andreas fault: Geological Society of America Bulletin, v. 101, p. 711–730, doi: 10.1130/0016-7606(1989)101<0711:OAMPOC>2.3.CO;2.

Grant, F.B., Waggoner, J.T., Rockwell, T.K., and von Stein, C., 1997, Paleoseismicity of the north branch of the Newport-Inglewood fault zone in Huntington Beach, California, from cone penetrometer test data: Seismological Society of America Bulletin, v. 87, p. 277–293.

Grant, L.B., Mueller, K.J., Gath, E.M., Cheng, H., Edwards, R.L., Munro, R., and Kennedy, G.L., 1999, Late Quaternary uplift and earthquake potential of the San Joaquin Hills, southern Los Angeles basin, California: Geology, v. 27, p. 1,031–1,034.

Gries, J.C., and Haenggi, W.T., 1970, Structural evolution of the eastern Chihuahua tectonic belt, *in* Seewald, K., and Sundeen, D., eds., The geologic framework of the Chihuahua Tectonic Belt: Symposium in honor of Professor Ronald K. DeFord: Midland, West Texas Geological Society, p. 119–138.

Hail, W.J., Jr., 1968, Geology of southwestern North Park and vicinity, Colorado: U.S. Geological Survey Bulletin, v. 1257, 119 p.

Hall, C.A., Jr., 1978, Origin and development of the Lompoc-Santa Maria pull-apart basin and its relationship to the San Simeon-Hosgri strike-slip fault, western California, *in* Silver, E.A., and Normark, W.R., eds., San Gregorio-Hosgri fault zone, California: California Division of Mines and Geology Special Report 137, p. 25–31.

Hall, N.T., Hunt, T.D., and Vaughan, P.R., 1994, Holocene behavior of the San Simeon fault zone, south-central coastal California, *in* Alterman, I.B., et al., eds., Seismotectonics of the Central California Coast Ranges: Geological Society of America Special Paper 292, p. 167–189.

Hall, N.T., Wright, R.H., and Clahan, K.B., 1999, Paleoseismic studies of the San Francisco Peninsula segment of the San Andreas fault zone near Woodside, California: Journal of Geophysical Research, v. 104, p. 23,215–23,236, doi: 10.1029/1999JB900157.

Haller, K.M., Wheeler, R.L., and Rukstales, K.S., 2002, Documentation of changes in fault parameters for the 2002 National Seismic Hazard Maps—Conterminous United States except California: U.S. Geological Survey Open-File Report 02–467, 34 p.

Hamilton, D.H., and Willingham, C.R., 1977, Hosgri fault zone: Structure, amount of displacement, and relationship to structures of the western Transverse Ranges: Geological Society of America Abstracts with Programs, v. 9, p. 429.

Hanson, K.L., and Lettis, W.R., 1994, Estimated Pleistocene slip rate for the San Simeon fault zone, south-central California coast, *in* Alterman, I.B., et al., eds., Seismotectonics of the Central California Coast Ranges: Geological Society of America Special Paper 292, p. 133–150.

Harden, J.W., and Matti, J.C., 1989, Holocene and late Pleistocene slip rates on the San Andreas fault in Yucaipa, California, using displaced alluvial-fan deposits and soil chronology: Geological Society of America Bulletin, v. 101, p. 1107–1117, doi: 10.1130/0016-7606(1989)101<1107:HALPSR>2.3.CO;2.

Hart, E.W., 1976, Basic geology of the Santa Margarita area, San Luis Obispo County, California: California Division of Mines and Geology Bulletin 199, 45 p.

Hart, E.W., Bryant, W.A., Manson, M.W., and Kahle, J.E., 1986, Summary report, fault evaluation program, 1984–1985, southern Coast Ranges region and other areas: California Division of Mines and Geology Open-File Report 86-3, 26 p.

Hay, E.A., Hall, N.T., and Cotton, W.R., 1989, Rapid creep on the San Andreas fault at Bitterwater Valley, *in* Sylvester, A.G., and Crowell, J.C., eds., The San Andreas Transform Belt: American Geophysical Union Field Trip Guidebook T309, p. 36–39.

Heath, E.G., Jensen, D.E., and Lukesh, D.W., 1982, Style and age of deformation on the Chino fault, *in* Cooper, J.D., ed., Neotectonics in southern California: Geological Society of America, Cordilleran Section, 7th Annual Meeting Guidebook, Anaheim, California, p. 123–134.

Hecker, S., Fumal, R.E., Powers, T.J., Hamilton, J.C., Garvin, C.D., and Schwartz, D.P., 1993, Late Pleistocene-Holocene behavior of the Homestead Valley fault segment, 1992 Landers, CA rupture surface: Eos (Transactions, American Geophysical Union), v. 74, Fall Meeting Supplement, p. 612.

Henry, C.D., 1989, Late Cenozoic Basin and Range structure in western Mexico adjacent to the Gulf of California: Geological Society of America Bulletin, v. 101, p. 1147–1156, doi: 10.1130/0016-7606(1989)101<1147:LCBARS>2.3.CO;2.

Hodges, K.V., and Walker, J.D., 1992, Extension in the Cretaceous Sevier orogen, North American cordillera: Geological Society of America Bulletin, v. 104, p. 560–569, doi: 10.1130/0016-7606(1992)104<0560:EITCSO>2.3.CO;2.

Hodges, K.V., McKenna, L.W., and Harding, M.B., 1990, Structural unroofing of the central Panamint Mountains, Death Valley region, southeastern California, *in* Wernicke, B.P., ed., Basin and Range extensional tectonics near the latitude of Las Vegas, Nevada: Geological Society of America Memoir 176, p. 377–390.

Holm, R.F., and Cloud, R.A., 1990, Regional significance of recurrent faulting and intracanyon volcanism at Oak Creek Canyon, southern Colorado Plateau, Arizona: Geology, v. 18, p. 1014–1017, doi: 10.1130/0091-7613(1990)018<1014:RSORFA>2.3.CO;2.

Holm, D.K., Snow, J.K., and Lux, D.R., 1992, Thermal and barometric constraints on the intrusive and unroofing history of the Black Mountains: Implications for timing, initial dip, and kinematics of detachment faulting in the Death Valley region, California: Tectonics, v. 11, p. 507–522.

Hooke, R. L., 1972, Geomorphic evidence for late Wisconsin and Holocene tectonic deformation, Death Valley, California: Geological Society of America Bulletin, v. 83, p. 2,073–2,098.

Huber, N.K., 1990, The late Cenozoic evolution of the Tuolumne River, central Sierra Nevada, California: Geological Society of America Bulletin, v. 102, p. 102–115, doi: 10.1130/0016-7606(1990)102<0102:TLCEOT>2.3.CO;2.

Huffington, R.M., 1943, Geology of the northern Quitman Mountains, trans-Pecos Texas: Geological Society of America Bulletin, v. 54, p. 987–1048.

Huftile, G.J., and Yeats, R.S., 1996, Deformation rates across the Placerita (Northridge Mw =6.7 aftershock zone) and Hopper Canyon segments of the western Transverse Ranges deformation belt: Seismological Society of America Bulletin, v. 86, p. S3–S18.

Hull, A.G., and Nicholson, C., 1992, Seismotectonics of the northern Elsinore fault zone, southern California: Seismological Society of America Bulletin, v. 82, p. 800–818.

Hunter, R.B., 1988, Timing and structural interaction between the thrust belt and foreland, Hoback Basin, Wyoming, *in* Schmidt, C. J., and Perry, W. J., Jr., eds., Interaction of the Rocky Mountain Foreland and the Cordilleran Thrust Belt: Geological Society of America Memoir 171, p. 367–393.

Hurrich, C.A., 1981, Gravity interpretation of the southern Wind River Mountains, Wyoming [M.S. thesis]: Laramie, University of Wyoming.

Hyndman, D.W., Alt, D., and Sears, J.W., 1988, Post-Archean metamorphic and tectonic evolution of western Montana and northern Idaho, *in* Ernst, W.G., ed., Metamorphism and crustal evolution of the western United States: Rubey Volume 7: Englewood Cliffs, New Jersey, Prentice Hall, p. 332–361.

Ingersoll, R.V., and Rumelhart, P.E., 1999, Three-stage evolution of the Los Angeles basin, southern California: Geology, v. 27, p. 593–596, doi: 10.1130/0091-7613(1999)027<0593:TSEOTL>2.3.CO;2.

Ingersoll, R.V., Cavazza, W., Baldridge, W.S., and Shafiqullah, M., 1990, Cenozoic sedimentation and paleotectonics of north-central New Mexico: Implications for initiation and evolution of the Rio Grande Rift: Geological Society of America Bulletin, v. 102, p. 1280–1296, doi: 10.1130/0016-7606(1990)102<1280:CSAPON>2.3.CO;2.

Izett, G.A., 1975, Late Cenozoic sedimentation and deformation in northern Colorado and adjoining areas, *in* Curtis, B.F., ed., Cenozoic history of the southern Rocky Mountains: Geological Society of America Memoir 144, p. 179–210.

Jayko, A.S., 1990, Shallow crustal deformation in the Pahranagat area, southern Nevada, *in* Wernicke, B.P., ed., Basin and Range extensional tectonics near the latitude of Las Vegas, Nevada: Geological Society of America Memoir 176, p. 213–236.

Johnson, P.P., 1981, Geology of the Red Rock Fault and adjacent Red Rock Valley, Beaverhead County, Montana [M.S. thesis]: Missoula, University of Montana.

Johnson, S.Y., Potter, C.J., and Armentrout, J.M., 1994, Origin and evolution of the Seattle fault and Seattle basin, Washington: Geology, v. 22, p. 71–74, doi: 10.1130/0091-7613(1994)022<0071:OAEOTS>2.3.CO;2.

Kahle, J.E., 1966, Megabreccias and sedimentary structures of the Plush Ranch formation, northern Ventura County, California [M.A. thesis]: Los Angeles, University of California, 125 p.

Keller, E.A., Bonkowski, M.S., Korsch, R.J., and Salemon, R.J., 1982, Tectonic geomorphology of the San Andreas fault zone in the southern Indio Hills: Geological Society of America Bulletin, v. 93, p. 46–56, doi: 10.1130/0016-7606(1982)93<46:TGOTSA>2.0.CO;2.

Keller, G.R., Morgan, P., and Seager, W.R., 1990, Crustal structure, gravity anomalies and heat flow in the southern Rio Grande rift and their relationship to extensional tectonics: Tectonophysics, v. 174, p. 21–37, doi: 10.1016/0040-1951(90)90382-I.

Kelson, K.I., Simpson, D.G., Lettis, W.R., and Haraden, C.C., 1996, Holocene slip rate and earthquake recurrence of the northern Calaveras fault at Leyden Creek, northern California: Journal of Geophysical Research, v. 101, p. 5961–5976, doi: 10.1029/95JB02244.

Kennedy, M.P., 1975, Geology of the San Diego metropolitan area, California: California Division of Mines and Geology Bulletin, v. 200, p. 1–39.

Kennedy, M.P., 1977, Recency and character of faulting along the Elsinore fault zone in southern Riverside County, California: California Division of Mines and Geology Special Report 131, 12 p.

Kistler, R.W., and Peterman, Z.E., 1978, Reconstruction of crustal blocks of California on the basis of initial strontium isotopic compositions of Mesozoic granitic rocks: U.S. Geological Survey Professional Paper 1071, 17 p.

Knepper, D.H., Jr., 1976, Late Cenozoic evolution of the Rio Grande rift zone, central Colorado, *in* Epis, R.C., and Weimer, R.J., eds., Studies in Colorado field geology: Colorado School of Mines Professional Contribution, v. 8, p. 421–430.

Kuenzi, W.D., 1966, Tertiary stratigraphy in the Jefferson River basin, Montana [Ph.D. thesis]: Missoula, University of Montana.

Labotka, T.C., and Albee, A.L., 1990, Uplift and exposure of the Panamint metamorphic complex, California, *in* Wernicke, B.P., ed., Basin and Range extensional tectonics near the latitude of Las Vegas, Nevada: Geological Society of America Memoir 176, p. 345–362.

Lamar, D.L., 1961, Structural evolution of the northern margin of the Los Angeles basin: [Ph.D thesis]: Los Angeles, University of California, 142 p.

Lettis, W.R., and Hall, N.T., 1994, Los Osos fault zone, San Luis Obispo County, California, *in* Alterman, I.B., et al., eds., Seismotectonics of the Central California Coast Ranges: Geological Society of America Special Paper 292, p. 73–102.

Lettis, W.R., Kelson, K.I., Wesling, J.R., Angell, M., Hanson, K.L., and Hall, N.T., 1994, Quaternary deformation of the San Luis Range, San Luis Obispo County, California, *in* Alterman, I.B., et al., eds., Seismotectonics of the Central California Coast Ranges: Geological Society of America Special Paper 292, p. 111–132.

Lienkaemper, J.J., and Borchardt, G., 1996, Holocene slip rate of the Hayward fault at Union City, California: Journal of Geophysical Research, v. 101, p. 6099–6108, doi: 10.1029/95JB01378.

Lienkaemper, J.J., Borchardt, G., Wilmesher, J.F., and Meier, D., 1989, Holocene slip rate along the Hayward fault, northern California: Eos (Transactions, American Geophysical Union), v. 70, p. 1349.

Lindsey, D.A., Johnson, B.R., and Andriessen, P.A.M., 1983, Laramide and Neogene structure of the northern Sangre de Christo Range, south-central Colorado, *in* Lowell, J.D., and Gries, R., eds., Rocky Mountain foreland basins and uplifts: Denver, Colorado, Rocky Mountain Association of Geologists Guidebook, p. 219–228.

Lindvall, S.C., and Rockwell, T.K., 1995, Holocene activity of the Rose Canyon fault zone in San Diego, California: Journal of Geophysical Research, v. 100, p. 24,121–24,132, doi: 10.1029/95JB02627.

Lisenbee, A.L., Woodward, L.A., and Connolly, J.R., 1979, Tijeras-Canoncito fault system: A major zone of recurrent movement in north-central New Mexico, *in* Ingersoll, R.V., ed., Guidebook of Santa Fe County: New Mexico Geological Society Guidebook, v. 30, p. 89–99.

Loring, A.K., 1976, Distribution in time and space of late Phanerozoic normal faulting in Nevada and Utah: Utah Geology, v. 3, p. 97–109.

Love, J.D., 1956, Summary of geologic history of Teton County, Wyoming, during Late Cretaceous, Tertiary, and Quaternary times, *in* Berg, R.R., and Strickland, J.W., eds., Jackson Hole: Wyoming Geological Association 11th Annual Field Conference Guidebook, p. 140–150.

Love, J.D., 1970, Cenozoic geology of the Granite Mountains area, central Wyoming: U.S. Geological Survey Professional Paper 495-C, 154 p.

Love, J.D., and Reed, J.C., Jr., 1968, Creation of the Teton Landscape; the geologic story of Grand Teton National Park: Moose, Wyoming, Grand Teton Natural History Association, 120 p.

Lowman, P.D., 1980, Vertical displacement on the Elsinore fault of southern California: Evidence from orbital photographs: The Journal of Geology, v. 88, p. 415–432.

Lucchitta, I., 1979, Late Cenozoic uplift of the southwestern Colorado Plateau and adjacent lower Colorado River region: Tectonophysics, v. 61, p. 63–95, doi: 10.1016/0040-1951(79)90292-0.

Machette, M.N., Personius, S.F., Nelson, A.R., Schwartz, D.P., and Lund, W.R., 1991, The Wasatch fault zone, Utah: Segmentation and history of Holocene earthquakes: Journal of Structural Geology, v. 13, p. 137–149, doi: 10.1016/0191-8141(91)90062-N.

Marin, M., Dolan, J.F., Hartleb, R.D., Christofferson, S.A., Tucker, A.Z., and Owen, L.A., 2000, A latest Pleistocene-Holocene slip rate on the Raymond fault based on 3-D trenching, East Pasadena, California: Eos (Transactions, American Geophysical Union), v. 81, supplement, p. F855.

Matmon, A., Schwartz, D.P., Finkel, R., Clemmens, S., and Hanks, T., 2005, Dating offset fans along the Mojave section of the San Andreas fault using cosmogenic 26Al and 10Be: Geological Society of America Bulletin, v. 117, p. 795–807, doi: 10.1130/B25590.1.

Mattinson, J.M., and James, E.W., 1985, Salinian block U/Pb age and isotopic variations: Implications for origin and emplacement of the Salinian terrane, *in* Howell, D.G., ed., Tectonostratigraphic terranes of the Circum-Pacific region: Houston, Texas, Circum-Pacific Council on Energy and Mineral Resources, p. 215–226.

Mayer, L., 1979, Evolution of the Mogollon Rim in central Arizona: Tectonophysics, v. 61, p. 49–62, doi: 10.1016/0040-1951(79)90291-9.

McCalpin, J., 1982, Quaternary geology and neotectonics of the west flank of the northern Sangre de Christo Mountains, south-central Colorado: Colorado School of Mines Quarterly, v. 77, no. 3, 97 p.

McCalpin, J.P., Forman, S.L., and Lowe, M., 1994, Reevaluation of Holocene faulting at the Kaysville site, Weber segment of the Wasatch fault zone, Utah: Tectonics, v. 13, p. 1–16, doi: 10.1029/93TC02067.

McCrory, P.A., Foster, D.S., Danforth, W.W., and Hamer, M.R., 2002, Crustal deformation at the leading edge of the Oregon Coast Range block, offshore Washington (Columbia River to Hoh River): U.S. Geological Survey Professional Paper 1661-A, 47 p.

McCulloch, D.S., 1987, Regional geology and hydrocarbon potential of offshore central California, *in* Scholl, D.W., et al., eds., Geology and resource potential of the continental margin of western North America and adjacent ocean basins—Beaufort Sea to Baja California: Houston, Texas, Circum-Pacific Council for Energy and Mineral Resources, p. 353–402.

McCulloh, T.H., Beyer, L.A., and Enrico, R.J., 2000, Paleogene strata of the eastern Los Angeles basin, California: Paleogeography and constraints on Neogene structural evolution: Geological Society of America Bulletin, v. 112, p. 1155–1178, doi: 10.1130/0016-7606(2000)112<1155:PSOTEL>2.3.CO;2.

McGill, J.T., 1981, Recent movement on the Potrero Canyon fault, Pacific Palisades area, Los Angeles: U.S. Geological Survey Professional Paper 1175, p. 258–259.

McGill, J.T., 1989, Geologic maps of the Pacific Palisades area, Los Angles, California: U.S. Geological Survey Miscellaneous Investigations Series Map I-1828, scale 1:4800.

McGrew, P.O., 1971, The Tertiary history of Wyoming, *in* Renfro, A.R., et al., eds., Symposium on Wyoming tectonics and their economic significance: Wyoming Geological Association Guidebook, v. 23, p. 29–34.

McKenna, L.W., and Hodges, K.V., 1990, Constraints on the kinematics and timing of late Miocene–recent extension between the Panamint and Black Mountains, southeastern California, *in* Wernicke, B.P., ed., Basin and Range extensional tectonics near the latitude of Las Vegas, Nevada: Geological Society of America Memoir 176, p. 363–376.

McNeilan, T.W., Rockwell, T.K., and Resnick, G.S., 1996, Style and rate of Holocene slip, Palos Verdes fault, southern California: Journal of Geophysical Research, v. 101, p. 8317–8334, doi: 10.1029/95JB02251.

Medwedeff, D.A., 1992, Geometry and kinematics of an active, laterally propagating wedge thrust, Wheeler Ridge, California, *in* Mitra, S., and Fisher, G.W., eds., Structural geology of fold and thrust belts: Baltimore, Maryland, Johns Hopkins University Press, p. 3–28.

Meisling, K.E., and Weldon, R.J., 1982, Slip-rate, offset, and history of the Cleghorn fault, western San Bernardino mountains, southern California: Geological Society of America Abstracts with Programs, v. 14, p. 217.

Meisling, K.E., and Weldon, R.J., 1986, Cenozoic uplift of the San Bernardino Mountains: Possible thrusting across the San Andreas fault: Geological Society of America Abstracts with Programs, v. 18, p. 157.

Merifield, P.M., Rockwell, T.K., and Loughman, C.C., 1987, Slip rate on the San Jacinto fault in the Anza seismic gap: Geological Society of America Abstracts with Programs, v. 19, p. 431–432.

Millman, D.E., and Rockwell, T.K., 1986, Neotectonics of the Elsinore fault in Temescal Valley, California, *in* Ehlig, P., ed., Neotectonics and faulting in southern California: Los Angeles, California State University, Department of Geology, p. 159–166.

Monroe, J.S., 1976, Vertebrate paleontology, stratigraphy, and sedimentation of the upper Ruby River basin, Madison County, Montana [Ph.D. thesis]: Missoula, University of Montana.

Morton, D.M., 1980, Earthquake hazard studies, upper Santa Anna Valley and adjacent areas, southern California: Summaries of Technical Reports, National Earthquake Hazards Reduction Program: U.S. Geological Survey Open-File Report 80–842, 113 p.

Morton, D.M., Matti, J.C., and Tinsley, J.C., 1982, Quaternary history of the Cucamonga fault zone, southern California: Geological Society of America Abstracts with Programs, v. 14, p. 218.

Morton, D.M., Matti, J.C., Miller, F.K., and Repenning, C.A., 1986, Pleistocene conglomerate from the San Mateo Badlands, southern California: Constraints on strike-slip displacements on the San Andreas and San Jacinto faults: Geological Society of America Abstracts with Programs, v. 18, p. 161.

Mudge, M.R., 1982, A resume of the structural geology of the Northern Disturbed Belt, northwestern Montana, *in* Powers, R.B., ed., Geologic studies of the Cordilleran Thrust Belt, volume 1: Denver, Colorado, Rocky Mountain Association of Geologists, p. 91–122.

Namson, J., and Davis, T., 1988, Structural transect of the western Transverse Ranges, California: Implications for lithospheric kinematics and seismic risk evaluation: Geology, v. 16, p. 675–679, doi: 10.1130/0091-7613(1988)016<0675:STOTWT>2.3.CO;2.

Namson, J., Davis, T., and Lagoe, M.G., 1983, Thrust-fold deformation style of seismically active structures near Coalinga, California: Eos (Transactions, American Geophysical Union), v. 64, p. 749–750.

Niemi, T.M., and Hall, N.T., 1992, Late Holocene slip rate and recurrence of great earthquakes on the San Andreas fault in northern California: Geology, v. 20, p. 195–198, doi: 10.1130/0091-7613(1992)020<0195:LHSRAR>2.3.CO;2.

Nitchman, S.P., and Slemmons, D.B., 1994, The Wilmar Avenue fault: A late Quaternary reverse fault near Pismo Beach, California, *in* Alterman, I.B., et al., eds., Seismotectonics of the Central California Coast Ranges: Geological Society of America Special Paper 292, p. 103–110.

O’Connor, J.E., and Chase, C.G., 1989, Uplift of the Sierra San Pedro Martir, Baja California, Mexico: Tectonics, v. 8, p. 833–844.

Oldow, J.S., Bally, A.W., Ave Lallemant, H.G., and Leeman, W.P., 1989, Phanerozoic evolution of the North American Cordillera;United States and Canada, *in* Bally, A.W., and Palmer, A.R., eds., The geology of North America—An overview: Boulder, Colorado, Geological Society of America, Geology of North America, v. A, p. 139–232, plates 5–7.

Otton, J.K., 1995, Western frontal fault of the Canyon Range: Is it the breakaway zone of the Sevier Desert detachment?: Geology, v. 23, p. 547–550, doi: 10.1130/0091-7613(1995)023<0547:WFFOTC>2.3.CO;2.

Parry, W.T., Hedderly-Smith, D., and Bruhn, R.L., 1991, Fluid inclusions and hydrothermal alteration on the Dixie Valley fault, Nevada: Journal of Geophysical Research, v. 96, p. 19,733–19,748.

Pekarek, A.H., 1974, The structural geology and volcanic petrology of the Rattlesnake Hills, Wyoming [Ph.D. thesis]: Laramie, University of Wyoming.

Perkins, J.A., Sims, J.D., and Sturgess, S.S., 1989, Late Holocene movement along the San Andreas fault at Melendy Ranch: Implications for the distribution of fault slip in central California: Journal of Geophysical Research, v. 94, p. 10,217–10,230.

Personius, S.F., Dart, R.L., Bradley, L.-A., and Haller, K.M., 2003, Map and data for Quarternary faults and folds in Oregon: U.S. Geological Survey Open-File Report 03–095, version 1.0.

Petersen, M.D., and Wesnousky, S.G., 1994, Fault slip rates and earthquake histories for active faults in southern California: Seismological Society of America Bulletin, v. 84, p. 1608–1649.

Petersen, M.D., Bryant, W.A., Cramer, C.H., Cao, T., Reichle, M., Frankel, A.D., Lienkemper, J.J., McCrory, P.A., and Schwartz, D.P., 1996, Probabilistic seismic hazard assessment for the state of California: California Division of Mines and Geology Open-File Report 96-08 (http://www.consrv.ca.gov/cgs/rghm/psha/ofr9608).

Pezzopane, S.K., and Weldon, R.J., II, 1993, Tectonic role of active normal faulting in central Oregon: Tectonics, v. 12, p. 1140–1169.

Pierce, K.L., and Morgan, L.A., 1992, The track of the Yellowstone hot spot: Volcanism, faulting, and uplift, *in* Link, P.K., et al., eds., Regional geology of eastern Idaho and western Wyoming: Geological Society of America Memoir 179, p. 1–54.

Pinault, C.T., and Rockwell, T.K., 1984, Rates and sense of faulting on the southern Elsinore fault: Further constraints on the distribution of dextral shear between the Pacific and North America plates: Geological Society of America Abstracts with Programs, v. 16, p. 624.

Pinter, N., and Sorlien, C., 1991, Evidence for latest Pleistocene to Holocene movement on the Santa Cruz Island fault, California: Geology, v. 19, p. 909–912, doi: 10.1130/0091-7613(1991)019<0909:EFLPTH>2.3.CO;2.

Pollard, W.J., and Rockwell, T.K., 1995, Late Holocene slip rate for the Coyote Creek fault, Imperial Valley, California: Geological Society of America Abstracts with Programs, v. 27, p. 72.

Prentice, C.S., 1989, Earthquake geology of the northern San Andreas fault near Point Arena, California [Ph.D. thesis]: Pasadena, California Institute of Technology, 252 p.

Prentice, C.S., Weldon, R.J., and Sieh, K.E., 1986, Distribution of slip between the San Andreas and San Jacinto faults near San Bernardino, southern California: Geological Society of America Abstracts with Programs, v. 18, p. 172.

Prentice, C.S., Merritts, D.J., Beutner, E.C., Bodin, P., Schill, A., and Muller, J.R., 1999, Northern San Andreas fault near Shelter Cove, California: Geological Society of America Bulletin, v. 111, p. 512–523, doi: 10.1130/0016-7606(1999)111<0512:NSAFNS>2.3.CO;2.

Rasmussen, G.S., 1982, Geologic features and rate of movement along the south branch of the San Andreas fault near San Bernardino, California, *in* Cooper, J.D., ed., Neotectonics in southern California: Boulder, Colorado, Geological Society of America, Cordilleran Section, Annual Meeting Guidebook, 78th, p. 109–114.

Rehrig, W.A., 1986, Processes of regional Tertiary extension in the western Cordillera: Insights from the metamorphic core complexes, *in* Mayer, L., ed., Extensional tectonics of the southwestern United States: A perspective on processes and kinematics: Geological Society of America Special Paper 208, p. 97–122.

Reynolds, M.W., Wright, L.A., and Troxel, B.W., 1986, Geometry and chronology of late Cenozoic detachment faulting, Funeral and Grapevine Mountains, Death Valley, California: Geological Society of America Abstracts with Programs, v. 18, p. 175.

Rockwell, T., 1988, Neotectonics of the San Cayetano fault, Transverse Ranges, California: Geological Society of America Bulletin, v. 100, p. 500–513, doi: 10.1130/0016-7606(1988)100<0500:NOTSCF>2.3.CO;2.

Rockwell, T.K., Loughman, C., and Merifield, P.M., 1990, Late Quaternary rate of slip along the San Jacinto fault zone near Anza, southern California: Journal of Geophysical Research, v. 95, p. 8593–8605.

Rubin, C., and Sieh, K., 1997, Long dormancy, low slip rate, and similar slip-per-event for the Emerson fault, eastern California shear zone: Journal of Geophysical Research, v. 102, p. 15,319–15,333, doi: 10.1029/97JB00265.

Rubin, C.M., Lindvall, S.C., and Rockwell, T.K., 1998, Evidence for large earthquakes in metropolitan Los Angeles: Science, v. 281, p. 398–402, doi: 10.1126/science.281.5375.398.

Rust, D.J., 1982, Evidence for uniformity of large earthquakes in the “big bend” of the San Andreas fault: Eos (Transactions, American Geophysical Union), v. 63, p. 1030.

Saint-Amand, P., and Roquemore, G.R., 1979, Tertiary and Holocene development of the southern Sierra Nevada and Coso Range, California: Tectonophysics, v. 52, p. 409–410, doi: 10.1016/0040-1951(79)90255-5.

Sales, J.K., 1983, Collapse of Rocky Mountain basement uplifts, *in* Lowell, J.D., and Gries, R., eds., Rocky Mountain foreland basins and uplifts: Denver, Colorado, Rocky Mountain Association of Geologists Guidebook, p. 79–98.

Salyards, S.L., Sieh, K.E., and Kirschvink, J.L., 1992, Paleomagnetic measurement of nonbrittle coseismic deformation across the San Andreas fault at Pallett Creek: Journal of Geophysical Research, v. 97, p. 12,457–12,470.

Sanders, G.F., Jr., 1975, Geology of the Buffalo Peaks, Park and Chaffee Counties, Colorado [M.S. thesis]: Golden, Colorado School of Mines, 62 leaves, 2 plates.

Sarna-Wojcicki, A.M., Lajoie, D.R., Robinson, S.W., and Yerkes, R.F., 1979, Recurrent Holocene displacement on the Javon Canyon fault, rates of faulting, and regional uplift, western Transverse Ranges, California: Geological Society of America Abstracts with Programs, v. 11, p. 125.

Sarna-Wojcicki, A.M., Meyer, C.E., and Slate, J.L., 1986, Displacement of a circa 6 Ma tuff across the San Andreas fault system, northern California: Eos (Transactions, American Geophysical Union), v. 67, p. 1224.

Sarna-Wojcicki, A.M., Lajoie, K.R., and Yerkes, R.F., 1987, Recurrent Holocene displacement on the Javon Canyon fault—A comparison of fault-movement history with calculated average recurrence intervals, *in* Morton, D.M., and Yerkes, R.F., eds., Recent reverse faulting in the Transverse Ranges, California: U.S. Geological Survey Professional Paper 1339, p. 125–135.

Southern California Earthquake Center Working Group C, 2001, Active faults in the Los Angeles metropolitan area: Southern California Earthquake Center, Los Angeles, SCEC Special Publication Series, no. 001.

Schwartz, D.P., and Weldon, R., 1986, Late Holocene slip rate on the Mojave segment of the San Andreas fault, Littlerock, CA: Preliminary results: Eos (Transactions, American Geophysical Union), v. 67, p. 906.

Seager, W.R., Shafiqullah, M., Hawley, J.W., and Marvin, R.F., 1984, New K-Ar dates from basalts and the evolution of the southern Rio Grande rift: Geological Society of America Bulletin, v. 95, p. 87–99, doi: 10.1130/0016-7606(1984)95<87:NKDFBA>2.0.CO;2.

Shafiqullah, M., Damon, P.E., Lynch, D.J., Reynolds, S.J., Rehrig, W.A., and Raymond, R.H., 1980, K-Ar geochronology and geologic history of southwestern Arizona and adjacent regions: Arizona Geological Society Digest, v. 12, p. 201–260.

Sharp, R.V., 1967, San Jacinto fault zone in the Peninsular Ranges of southern California: Geological Society of America Bulletin, v. 78, p. 705–730, doi: 10.1130/0016-7606(1967)78[705:SJFZIT]2.0.CO;2.

Sharp, R.V., 1981, Variable rates of late Quaternary strike slip on the San Jacinto fault zone, southern California: Journal of Geophysical Research, v. 86, p. 1754–1762.

Shaw, J.H., and Shearer, P.M., 1999, An elusive blind-thrust fault beneath metropolitan Los Angeles: Science, v. 283, p. 1516–1518, doi: 10.1126/science.283.5407.1516.

Sherrod, D.R., and Tosdal, R.M., 1991, Geologic setting and Tertiary structural evolution of southwestern Arizona and southeastern California: Journal of Geophysical Research, v. 96, p. 12,407–12,423.

Sieh, K.E., and Jahns, R.H., 1984, Holocene activity of the San Andreas fault at Wallace Creek, California: Geological Society of America Bulletin, v. 95, p. 883–896, doi: 10.1130/0016-7606(1984)95<883:HAOTSA>2.0.CO;2.

Smith, G.A., Snee, L.W., and Taylor, E.M., 1987, Stratigraphic, sedimentologic, and petrologic record of late Miocene subsidence of the central Oregon High Cascades: Geology, v. 15, p. 389–392, doi: 10.1130/0091-7613(1987)15<389:SSAPRO>2.0.CO;2.

Smith, J.F., Jr., and Ray, L.L., 1943, Geology of the Cimarron Range, New Mexico: Geological Society of America Bulletin, v. 54, p. 891–924.

Smith, R.S.U., 1979, Holocene offset and seismicity along the Panamint Valley fault zone, western Basin-and-Range province, California: Tectonophysics, v. 52, p. 411–416, doi: 10.1016/0040-1951(79)90256-7.

Snow, J.K., and White, C., 1990, Listric normal faulting and synorogenic sedimentation, northern Cottonwood Mountains, Death Valley region, California, *in* Wernicke, B.P., ed., Basin and Range extensional tectonics near the latitude of Las Vegas, Nevada: Geological Society of America Memoir 176, p. 413–446.

Stein, R.S., and Thatcher, W., 1981, Seismic and aseismic deformation associated with the 1952 Kern County, California, earthquake and relationship to the Quaternary history of the White Wolf fault: Journal of Geophysical Research, v. 86, p. 4913–4928.

Stephanson, W.J., Rockwell, T.K., Odum, J.K., Shedlock, K.M., and Okaya, D.A., 1995, Seismic reflection and geomorphic characterization of the onshore Palos Verdes fault zone, Los Angeles, California: Seismological Society of America Bulletin, v. 85, p. 943–950.

Steritz, J.W., and Luyendyk, B.P., 1994, Hosgri fault zone, offshore Santa Maria basin, California, *in* Alterman, I.B., et al., eds., Seismotectonics of the Central California Coast Ranges: Geological Society of America Special Paper 292, p. 191–209.

Stewart, J.H., 1978, Basin-range structure in western North America, *in* Smith, R.B., and Eaton, G.P., eds., Cenozoic tectonics and regional geophysics of the Western Cordillera: Geological Society of America Memoir 152, p. 1–32.

Stewart, J.H., 1998, Regional characteristics, tilt domains, and extensional history of the late Cenozoic Basin and Range province, western North America, *in* Faulds, J.E., and Stewart, J.H., eds., Accommodation zones and transfer zones: The regional segmentation of the Basin and Range Province: Geological Society of America Memoir 323, p. 47–74.

Stewart, J.H., and Crowell, J.C., 1992, Strike-slip tectonics in the Cordilleran region, western United States, *in* Burchfiel, B.C., et al., eds., The Cordilleran orogen: Conterminous U.S.: Boulder, Colorado, Geological Society of America, Geology of North America, v. G-3, p. 609–628.

Strane, M.D., Oskin, M., and Perg, L., 2005, A rapidly-slipping juvenile strike-slip fault in the Eastern California Shear Zone: Lenwood fault, Mojave Desert, California: Eos (Transactions, American Geophysical Union), fall meeting supplement, abs. G53A–0877.

Sutherland, P.K., 1963, Laramide orogeny, *in* Miller, J.P., et al., eds., Geology of part of the southern Sangre de Christo Mountains, New Mexico: New Mexico State Bureau of Mines and Mineral Resources and New Mexico Institute Mining Technology Memoir 11, p. 47–49.

Sweeney, J.J., 1982, Magnitudes of slip along the Greenville fault in the Diablo Range and Corral Hollow areas, *in* Hart, E.W., et al., eds., Conference on earthquake hazards in the eastern San Francisco Bay area: California Division of Mines and Geology Special Publication 62, p. 137–146.

Taylor, R.B., 1975, Neogene tectonism in south-central Colorado, *in* Curtis, B.F., ed., Cenozoic history of the Southern Rocky Mountains: Geological Society of America Memoir 144, p. 211–226.

Taylor, W.J., 1990, Spatial and temporal relations of Cenozoic volcanism and extension in the North Pahroc and Seaman ranges, eastern Nevada, *in* Wernicke, B.P., ed., Basin and Range extensional tectonics near the latitude of Las Vegas, Nevada: Geological Society of America Memoir 176, p. 181–194.

Tennyson, M.E., 1989, Pre-transform early Miocene extension in western California: Geology, v. 17, p. 792–796, doi: 10.1130/0091-7613(1989)017<0792:PTEMEI>2.3.CO;2.

Treiman, J.A., 1994, The Malibu Coast fault: Sacramento, California, Division of Mines and Geology Fault Evaluation Report FER-229, 42 p.

Troxel, B.W., and Butler, P.R., 1980, Tertiary and Quaternary fault history at the intersection of the Garlock and Death Valley fault zones, southern Death Valley, California: Summaries of Technical Reports, National Earthquake Hazards Reduction Program: U.S. Geological Survey Open-File Report 80–6, p. 45–47.

Tsutsumi, H., Yeats, R.S., and Huftile, G.J., 2001, Late Cenozoic tectonics of the northern Los Angeles fault system, California: Geological Society of America Bulletin, v. 113, p. 454–468, doi: 10.1130/0016-7606(2001)113<0454:LCTOTN>2.0.CO;2.

Tweto, O., 1979, The Rio Grande rift system in Colorado, *in* Riecker, R.E., ed., Rio Grande Rift: Tectonics and magmatism: Washington, D.C., American Geophysical Union, p. 33–56.

Unruh, J.R., and Moores, E.M., 1992, Quaternary blind thrusting in the southwestern Sacramento Valley, California: Tectonics, v. 11, p. 192–203.

U.S. Geological Survey Quaternary Fault and Fold Database: http://earthquake.usgs.gov/regional/qfaults/.

Ward, P.L., and Page, R.A., 1989, The Loma Prieta earthquake of October 17, 1989, *in* Hodgen, L.D., and Troll, J.A., eds.: U.S. Government Printing Office, U.S. Geological Survey Pamphlet, 16 p.

Ward, S.N., and Valensise, G., 1994, The Palos Verdes terraces, California: Bathtub rings from a buried reverse fault: Journal of Geophysical Research, v. 99, p. 4485–4494, doi: 10.1029/93JB03362.

Weber, G.E., and Cotton, W.R., 1981, Geologic investigation of recurrence intervals and recency of faulting along the San Gregorio fault zone, San Mateo County, California: U.S. Geological Survey Open-File Report 81–263, 99 p.

Weber, J.R., 1971, Structural geology of the northeastern flank of the Uinta Mountains, Moffat County, Colorado [M.S. thesis]: Golden, Colorado School of Mines, viii, 68 leaves, 5 plates.

Weldon, R.J., and Sieh, K.E., 1981, Offset rate and possible timing of recent earthquakes on the San Andreas fault in Cajon Pass, California: Eos (Transactions, American Geophysical Union), v. 62, p. 1048.

Weldon, R.J., and Sieh, K.E., 1985, Holocene rate of slip and tentative recurrence interval for large earthquakes on the San Andreas fault, Cajon Pass, southern California: Geological Society of America Bulletin, v. 96, p. 793–812, doi: 10.1130/0016-7606(1985)96<793:HROSAT>2.0.CO;2.

Weldon, R.J., II, Fletcher, D.K., Weldon, E.M., Scharer, K.M., and McCrory, P.A., 2003, An update of Quaternary faults of central and eastern Oregon: U.S. Geological Survey Open-File Report 02–301 (version 1.0), CD-ROM.

Weldon, R., Fumal, T., and Biassi, G., 2004, Wrightwood and the earthquake cycle: What a long recurrence record can tell us about how faults work: GSA Today, v. 14, no. 9, p. 4–10, doi: 10.1130/1052-5173(2004)014<4:WATECW>2.0.CO;2.

Wentworth, C.M., Zoback, M.D., and Bartow, J.A., 1983, Thrust and reverse faults beneath the Kettleman Hills anticlinal trend, Coalinga earthquake region, California, inferred from deep seismic-reflection data: Eos (Transactions, American Geophysical Union), v. 64, p. 747.

Wernicke, B., 1992, Cenozoic extensional tectonics of the U.S. Cordillera, *in* Burchfiel, B.C., et al., eds., The Cordilleran orogen: Conterminous U.S.: Boulder, Colorado, Geological Society of America, Geology of North America, v. G-3, p. 553–581, plate 8.

Working Group on California Earthquake Probabilities, 1995, Seismic hazards in southern California: Probable earthquakes, 1994 to 2024: Seismological Society of America Bulletin, v. 85, p. 379–439.

Winker, C.D., and Kidwell, S.M., 1986, Paleocurrent evidence for lateral displacement of the Pliocene Colorado River delta by the San Andreas fault system, southeastern California: Geology, v. 14, p. 788–791, doi: 10.1130/0091-7613(1986)14<788:PEFLDO>2.0.CO;2.

Winterfeld, G.F., and Conard, J.B., 1983, Laramide tectonics and deposition, Washakie Range and northwestern Wind River basin, Wyoming, *in* Lowell, J.D., and Gries, R., eds., Rocky Mountain foreland basins and uplifts: Denver, Colorado, Rocky Mountain Association of Geologists Guidebook, p. 137–148.

Wright, R.H., Hamilton, D.H., Hunt, J.D., Traubenik, M.L., and Shlemon, R.J., 1982, Character and activity of the Greenville structural trend, *in* Hart, E.W., et al., eds., Conference on Earthquake Hazards in the Eastern San Franciso Bay Area: California Division of Mines and Geology Special Publication 62, p. 187–196.

Wright, T.L., Parker, S., and Erikson, R.C., 1973, Stratigraphic evidence for the timing and nature of late Cenozoic deformation in the Los Angeles basin: American Association of Petroleum Geologists Abstracts.

Yeats, R.S., 1973, Newport-Inglewood fault zone, Los Angeles basin, California: American Association of Petroleum Geologists Bulletin, v. 57, p. 117–135.

Yeats, R.S., 1979, Stratigraphy and paleogeography of the Santa Susana fault zone, California, *in* Armentrout, J.M., et al., eds., Cenozoic paleogeography of the western United States: Los Angeles, Pacific Section, Society of Economic Paleontologists and Mineralogists, p. 191–204.

Yeats, R.S., 1993, Converging more slowly: Nature, v. 366, p. 299–301, doi: 10.1038/366299a0.

Yeats, R.S., Huftile, G.J., and Stilt, L.T., 1994, Late Cenozoic tectonics of the east Ventura basin, Transverse Ranges, California: American Association of Petroleum Geologists Bulletin, v. 78, p. 1040–1074.

Yerkes, R.F., McCulloch, T.H., Schoelhamer, J.E., and Vedder, J.G., 1965, Geology of the Los Angeles basin, California: An introduction: U.S. Geological Survey Professional Paper 420-A, 57 p.

Yerkes, R.F., Sarna-Wojcicki, A.M., and Lajoie, K.R., 1987, Geology and Quaternary deformation of the Ventura area, *in* Morton. D.M., and Yerkes, R.F., eds., Recent reverse faulting in the Transverse Ranges, California: U.S. Geological Survey Professional Paper 1339, p. 169–178.

Zhang, P., Ellis, M., Slemmons, D.B., and Mao, F., 1990, Right-lateral displacements and the Holocene slip rate associated with prehistoric earthquakes along the southern Panamint Valley fault zone: Implications for southern Basin and Range tectonics and coastal California deformation: Journal of Geophysical Research, v. 95, p. 4857–4872.
