# Supplementary material for: Uncertainties in long-term geologic offset rates of faults: General principles illustrated with data from California and other western states
Source: Oxford University Press journal article supplement (doi:10.1130/ges00127.1), 2007-01-01
Supplement: Table_1.xls [file Table_1.xls]

## Sheet: Slippery_GCN-pass3
Table 1. Single-feature and combined long-term offset rates for active and potentially-active fault trains in the author's data base for the western conterminous United States.
by Peter Bird [2007; Geosphere]
Uncertainties in long-term geologic offset rates of faults: General principles illustrated with data from California and other western states
F0000	Sense	Fault_train_name	Grade	Reference	Kilometers	sigma_(km)	Since_(Ma)	Before_(Ma)	l:P(L<l)=2.5%	mode of L	MEDIAN L	mean L	l:P(L<l)=97.5%	SIGMA_of_L
F2386	N	Algodones normal fault, AZ	C	Haller et al., 2002 (944; neotectonic rate)	.007-.015		.05-.1?	0	0.0417	0.0978	0.122	0.132	0.273	0.0607
F2386	N	Algodones normal fault, AZ	S	combined offset rate (1 GCN data)					0.00277	0.00187	0.124	0.149	0.402	0.148
F1984	N	Aubrey normal fault, AZ	C	USGS Quaternary Fault & Fold Database, 2005.01	0.002		0.2-0.1	0	0.00149	0.0285	0.0299	0.0368	0.0932	0.389
F1984	N	Aubrey normal fault, AZ	S	combined offset rate (1 GCN data)					0.000955	2.29E-6	0.0323	0.0678	0.411	0.391
F1985	N	Big Chino normal fault, AZ	C	Haller et al., 2002 (951; neotectonic rate)	.007-.008		.1-.08?	0	0.0278	0.0637	0.0673	0.0688	0.119	0.0233
F1985	N	Big Chino normal fault, AZ	C	USGS Quaternary Fault & Fold Database, 2005.01	0.025		0.4-0.2	0	0.054	0.0718	0.0833	0.09	0.164	0.0302
F1985	N	Big Chino normal fault, AZ	C	USGS Quaternary Fault & Fold Database, 2005.01	0.008		0.1-0.08	0	0.0308	0.0678	0.0718	0.0733	0.125	0.0243
F1985	N	Big Chino normal fault, AZ	S	combined offset rate (3 GCN data)					0.0493	0.0691	0.0722	0.074	0.105	0.0256
F0809	N	Diamond Rim normal fault, AZ	A	Mayer, 1979	0.3-0.4		25	12.1	2.84E-6	6.57E-7	0.0000776	0.000112	0.000413	0.000112
F0809	N	Diamond Rim normal fault, AZ	C	Christiansen and Yeats, 1992			13	8	4.3E-6	7.65E-7	0.000118	0.00017	0.00063	0.00017
F0809	N	Diamond Rim normal fault, AZ	S	combined offset rate (2 GCN data)					1.95E-6	5.29E-7	0.000052	0.00164	0.000329	0.0334
F2387	N	Dutchman Draw normal fault, AZ	C	Haller et al., 2002 (1003; neotectonic rate)	~0.1		1.7-1.1	0	0.0119	0.0691	0.0725	0.0747	0.151	0.0358
F2387	N	Dutchman Draw normal fault, AZ	S	combined offset rate (1 GCN data)					0.00191	0.00197	0.0747	0.1	0.399	0.148
F0876	N	Meriwhitica normal fault, AZ	S	combined offset rate (0 GCN data)					0.000304	0.00102	0.183	0.25	1.09	0.343
F0936	N	normal f. ESE of Santa Rita-Rincon Mts. gap, AZ	A	Baker, 1984	>1.25		37.8-35.6	27-21.8	1.41E-6	2.17E-7	0.0000386	0.0000558	0.000207	0.0000559
F0936	N	normal f. ESE of Santa Rita-Rincon Mts. gap, AZ	S	combined offset rate (1 GCN data)					1.55E-6	1.45E-7	0.0000413	0.0108	0.117	0.0874
F0700	N	normal fault E of Hualapai Mountains, AZ	C	Stewart, 1978	2-5		13-11		0.128	0.289	0.292	0.293	0.465	0.0857
F0700	N	normal fault E of Hualapai Mountains, AZ	C	Dickinson, 1979			30-15	5-1	0.00166	0.0285	0.0331	0.0868	0.314	1.17
F0700	N	normal fault E of Hualapai Mountains, AZ	S	combined offset rate (2 GCN data)					0.00205	0.00198	0.0903	0.16	0.437	0.756
F1631	N	normal fault E of Palo Verde Valley, AZ	C	Christiansen and Yeats, 1992			13	8	4.3E-6	7.65E-7	0.000118	0.00017	0.00063	0.00017
F1631	N	normal fault E of Palo Verde Valley, AZ	S	combined offset rate (1 GCN data)					5.11E-6	5.1E-7	0.000149	0.0364	0.399	0.157
F1634	N	normal fault S of South Trigo Peaks, AZ	C	Christiansen and Yeats, 1992			13	8	4.3E-6	7.65E-7	0.000118	0.00017	0.00063	0.00017
F1634	N	normal fault S of South Trigo Peaks, AZ	S	combined offset rate (1 GCN data)					5.11E-6	5.1E-7	0.000149	0.0364	0.399	0.157
F1630	N	normal fault SE of Palo Verde Valley, AZ	C	Christiansen and Yeats, 1992			13	8	4.3E-6	7.65E-7	0.000118	0.00017	0.00063	0.00017
F1630	N	normal fault SE of Palo Verde Valley, AZ	S	combined offset rate (1 GCN data)					5.11E-6	5.1E-7	0.000149	0.0364	0.399	0.157
F0699	N	normal fault W of Hualapai Mountains, AZ	C	Stewart, 1978	2-5		13-11		0.128	0.289	0.292	0.293	0.465	0.0857
F0699	N	normal fault W of Hualapai Mountains, AZ	C	Dickinson, 1979			30-15	5-1	0.00166	0.0285	0.0331	0.0868	0.314	1.17
F0699	N	normal fault W of Hualapai Mountains, AZ	S	combined offset rate (2 GCN data)					0.00205	0.00198	0.0903	0.16	0.437	0.756
F1635	N	normal fault W of Southern Dome Rock Mts., AZ	C	Christiansen and Yeats, 1992			13	8	4.3E-6	7.65E-7	0.000118	0.00017	0.00063	0.00017
F1635	N	normal fault W of Southern Dome Rock Mts., AZ	S	combined offset rate (1 GCN data)					5.11E-6	5.1E-7	0.000149	0.0364	0.399	0.157
F1632	N	normal fault W of Trigo Mountains, AZ	C	Christiansen and Yeats, 1992			13	8	4.3E-6	7.65E-7	0.000118	0.00017	0.00063	0.00017
F1632	N	normal fault W of Trigo Mountains, AZ	S	combined offset rate (1 GCN data)					5.11E-6	5.1E-7	0.000149	0.0364	0.399	0.157
F0724	N	normal fault, 31-32N, 109-110W, AZ	C	Dickinson, 1979			30-15	5-1	0.00166	0.0285	0.0331	0.0868	0.314	1.17
F0724	N	normal fault, 31-32N, 109-110W, AZ	S	combined offset rate (1 GCN data)					0.00101	2.29E-6	0.0358	0.11	0.536	1.09
F0730	N	normal fault, 31-32N, 109W, AZ	C	Dickinson, 1979			30-15	5-1	0.00166	0.0285	0.0331	0.0868	0.314	1.17
F0730	N	normal fault, 31-32N, 109W, AZ	C	Keller et al., 1990			10	3	0.0000115	1.37E-6	0.000317	0.000466	0.00176	0.00048
F0730	N	normal fault, 31-32N, 109W, AZ	S	combined offset rate (2 GCN data)					0.0000157	2.29E-6	0.000403	0.0164	0.091	0.416
F0715	N	normal fault, 31-32N, 111W, AZ	C	Dickinson, 1979			30-15	5-1	0.00166	0.0285	0.0331	0.0868	0.314	1.17
F0715	N	normal fault, 31-32N, 111W, AZ	S	combined offset rate (1 GCN data)					0.00101	2.29E-6	0.0358	0.11	0.536	1.09
F0725	N	normal fault, 31N, 109W, AZ	C	Dickinson, 1979			30-15	5-1	0.00166	0.0285	0.0331	0.0868	0.314	1.17
F0725	N	normal fault, 31N, 109W, AZ	S	combined offset rate (1 GCN data)					0.00101	2.29E-6	0.0358	0.11	0.536	1.09
F0722	N	normal fault, 31N, 110W, AZ	C	Dickinson, 1979			30-15	5-1	0.00166	0.0285	0.0331	0.0868	0.314	1.17
F0722	N	normal fault, 31N, 110W, AZ	S	combined offset rate (1 GCN data)					0.00101	2.29E-6	0.0358	0.11	0.536	1.09
F0723	N	normal fault, 31N, 110W, AZ	C	Dickinson, 1979			30-15	5-1	0.00166	0.0285	0.0331	0.0868	0.314	1.17
F0723	N	normal fault, 31N, 110W, AZ	S	combined offset rate (1 GCN data)					0.00101	2.29E-6	0.0358	0.11	0.536	1.09
F0716	N	normal fault, 31N, 111W, AZ	C	Dickinson, 1979			30-15	5-1	0.00166	0.0285	0.0331	0.0868	0.314	1.17
F0716	N	normal fault, 31N, 111W, AZ	S	combined offset rate (1 GCN data)					0.00101	2.29E-6	0.0358	0.11	0.536	1.09
F0717	N	normal fault, 31N, 111W, AZ	C	Dickinson, 1979			30-15	5-1	0.00166	0.0285	0.0331	0.0868	0.314	1.17
F0717	N	normal fault, 31N, 111W, AZ	S	combined offset rate (1 GCN data)					0.00101	2.29E-6	0.0358	0.11	0.536	1.09
F1557	N	normal fault, 32-33N, 108-109W, NM-AZ	C	Keller et al., 1990			30	3	0.0000115	1.37E-6	0.000317	0.000466	0.00176	0.00048
F1557	N	normal fault, 32-33N, 108-109W, NM-AZ	S	combined offset rate (1 GCN data)					0.0000134	8.16E-8	0.000397	0.0367	0.399	0.157
F0726	N	normal fault, 32-33N, 109-110W, AZ	C	Dickinson, 1979			30-15	5-1	0.00166	0.0285	0.0331	0.0868	0.314	1.17
F0726	N	normal fault, 32-33N, 109-110W, AZ	S	combined offset rate (1 GCN data)					0.00101	2.29E-6	0.0358	0.11	0.536	1.09
F0727	N	normal fault, 32-33N, 109-110W, AZ	C	Dickinson, 1979			30-15	5-1	0.00166	0.0285	0.0331	0.0868	0.314	1.17
F0727	N	normal fault, 32-33N, 109-110W, AZ	S	combined offset rate (1 GCN data)					0.00101	2.29E-6	0.0358	0.11	0.536	1.09
F0720	N	normal fault, 32-33N, 110W, AZ	C	Dickinson, 1979			30-15	5-1	0.00166	0.0285	0.0331	0.0868	0.314	1.17
F0720	N	normal fault, 32-33N, 110W, AZ	S	combined offset rate (1 GCN data)					0.00101	2.29E-6	0.0358	0.11	0.536	1.09
F0711	N	normal fault, 32-33N, 112W, AZ	C	Dickinson, 1979			30-15	5-1	0.00166	0.0285	0.0331	0.0868	0.314	1.17
F0711	N	normal fault, 32-33N, 112W, AZ	B	Shafiqullah et al., 1980			~15	8	4.3E-6	7.65E-7	0.000118	0.00017	0.00063	0.00017
F0711	N	normal fault, 32-33N, 112W, AZ	C	Christiansen and Yeats, 1992			13	8	4.3E-6	7.65E-7	0.000118	0.00017	0.00063	0.00017
F0711	N	normal fault, 32-33N, 112W, AZ	C	Stewart, 1998			15-10	8	4.3E-6	7.65E-7	0.000118	0.00017	0.00063	0.00017
F0711	N	normal fault, 32-33N, 112W, AZ	S	combined offset rate (4 GCN data)					3.71E-6	2.29E-6	0.0000414	0.0000588	0.000211	0.0000566
F0732	N	normal fault, 32N, 108-109W, NM-AZ	C	Dickinson, 1979			30-15	5-1	0.00166	0.0285	0.0331	0.0868	0.314	1.17
F0732	N	normal fault, 32N, 108-109W, NM-AZ	C	Keller et al., 1990			10	3	0.0000115	1.37E-6	0.000317	0.000466	0.00176	0.00048
F0732	N	normal fault, 32N, 108-109W, NM-AZ	S	combined offset rate (2 GCN data)					0.0000157	2.29E-6	0.000403	0.0164	0.091	0.416
F0728	N	normal fault, 32N, 109-110W, AZ	C	Dickinson, 1979			30-15	5-1	0.00166	0.0285	0.0331	0.0868	0.314	1.17
F0728	N	normal fault, 32N, 109-110W, AZ	C	Keller et al., 1990			10	3	0.0000115	1.37E-6	0.000317	0.000466	0.00176	0.00048
F0728	N	normal fault, 32N, 109-110W, AZ	S	combined offset rate (2 GCN data)					0.0000157	2.29E-6	0.000403	0.0164	0.091	0.416
F0729	N	normal fault, 32N, 109W, AZ	C	Dickinson, 1979			30-15	5-1	0.00166	0.0285	0.0331	0.0868	0.314	1.17
F0729	N	normal fault, 32N, 109W, AZ	C	Keller et al., 1990			10	3	0.0000115	1.37E-6	0.000317	0.000466	0.00176	0.00048
F0729	N	normal fault, 32N, 109W, AZ	S	combined offset rate (2 GCN data)					0.0000157	2.29E-6	0.000403	0.0164	0.091	0.416
F0721	N	normal fault, 32N, 110W, AZ	C	Dickinson, 1979			30-15	5-1	0.00166	0.0285	0.0331	0.0868	0.314	1.17
F0721	N	normal fault, 32N, 110W, AZ	S	combined offset rate (1 GCN data)					0.00101	2.29E-6	0.0358	0.11	0.536	1.09
F0713	N	normal fault, 32N, 111W, AZ	C	Dickinson, 1979			30-15	5-1	0.00166	0.0285	0.0331	0.0868	0.314	1.17
F0713	N	normal fault, 32N, 111W, AZ	S	combined offset rate (1 GCN data)					0.00101	2.29E-6	0.0358	0.11	0.536	1.09
F0714	N	normal fault, 32N, 111W, AZ	C	Dickinson, 1979			30-15	5-1	0.00166	0.0285	0.0331	0.0868	0.314	1.17
F0714	N	normal fault, 32N, 111W, AZ	S	combined offset rate (1 GCN data)					0.00101	2.29E-6	0.0358	0.11	0.536	1.09
F0708	N	normal fault, 32N, 113W, AZ	C	Dickinson, 1979			30-15	5-1	0.00166	0.0285	0.0331	0.0868	0.314	1.17
F0708	N	normal fault, 32N, 113W, AZ	B	Shafiqullah et al., 1980			~15	8	4.3E-6	7.65E-7	0.000118	0.00017	0.00063	0.00017
F0708	N	normal fault, 32N, 113W, AZ	C	Christiansen and Yeats, 1992			13	8	4.3E-6	7.65E-7	0.000118	0.00017	0.00063	0.00017
F0708	N	normal fault, 32N, 113W, AZ	C	Stewart, 1998			15-10	8	4.3E-6	7.65E-7	0.000118	0.00017	0.00063	0.00017
F0708	N	normal fault, 32N, 113W, AZ	S	combined offset rate (4 GCN data)					3.71E-6	2.29E-6	0.0000414	0.0000588	0.000211	0.0000566
F0719	N	normal fault, 33N, 110W, AZ	C	Dickinson, 1979			30-15	5-1	0.00166	0.0285	0.0331	0.0868	0.314	1.17
F0719	N	normal fault, 33N, 110W, AZ	S	combined offset rate (1 GCN data)					0.00101	2.29E-6	0.0358	0.11	0.536	1.09
F0712	N	normal fault, 33N, 111-112W, AZ	C	Dickinson, 1979			30-15	5-1	0.00166	0.0285	0.0331	0.0868	0.314	1.17
F0712	N	normal fault, 33N, 111-112W, AZ	C	Christiansen and Yeats, 1992			13	8	4.3E-6	7.65E-7	0.000118	0.00017	0.00063	0.00017
F0712	N	normal fault, 33N, 111-112W, AZ	S	combined offset rate (2 GCN data)					7.32E-6	2.29E-6	0.000152	0.0162	0.0911	0.416
F0706	N	normal fault, 33N, 112-113W, AZ	C	Dickinson, 1979			30-15	5-1	0.00166	0.0285	0.0331	0.0868	0.314	1.17
F0706	N	normal fault, 33N, 112-113W, AZ	B	Shafiqullah et al., 1980			~15	8	4.3E-6	7.65E-7	0.000118	0.00017	0.00063	0.00017
F0706	N	normal fault, 33N, 112-113W, AZ	C	Christiansen and Yeats, 1992			13	8	4.3E-6	7.65E-7	0.000118	0.00017	0.00063	0.00017
F0706	N	normal fault, 33N, 112-113W, AZ	C	Stewart, 1998			15-10	8	4.3E-6	7.65E-7	0.000118	0.00017	0.00063	0.00017
F0706	N	normal fault, 33N, 112-113W, AZ	S	combined offset rate (4 GCN data)					3.71E-6	2.29E-6	0.0000414	0.0000588	0.000211	0.0000566
F0709	N	normal fault, 33N, 112W, AZ	C	Dickinson, 1979			30-15	5-1	0.00166	0.0285	0.0331	0.0868	0.314	1.17
F0709	N	normal fault, 33N, 112W, AZ	B	Shafiqullah et al., 1980			~15	8	4.3E-6	7.65E-7	0.000118	0.00017	0.00063	0.00017
F0709	N	normal fault, 33N, 112W, AZ	C	Christiansen and Yeats, 1992			13	8	4.3E-6	7.65E-7	0.000118	0.00017	0.00063	0.00017
F0709	N	normal fault, 33N, 112W, AZ	S	combined offset rate (3 GCN data)					4.72E-6	2.29E-6	0.0000709	0.00161	0.000526	0.128
F0710	N	normal fault, 33N, 112W, AZ	C	Dickinson, 1979			30-15	5-1	0.00166	0.0285	0.0331	0.0868	0.314	1.17
F0710	N	normal fault, 33N, 112W, AZ	B	Shafiqullah et al., 1980			~15	8	4.3E-6	7.65E-7	0.000118	0.00017	0.00063	0.00017
F0710	N	normal fault, 33N, 112W, AZ	C	Christiansen and Yeats, 1992			13	8	4.3E-6	7.65E-7	0.000118	0.00017	0.00063	0.00017
F0710	N	normal fault, 33N, 112W, AZ	S	combined offset rate (3 GCN data)					4.72E-6	2.29E-6	0.0000709	0.00161	0.000526	0.128
F0704	N	normal fault, 33N, 113W, AZ	C	Dickinson, 1979			30-15	5-1	0.00166	0.0285	0.0331	0.0868	0.314	1.17
F0704	N	normal fault, 33N, 113W, AZ	B	Shafiqullah et al., 1980			~15	8	4.3E-6	7.65E-7	0.000118	0.00017	0.00063	0.00017
F0704	N	normal fault, 33N, 113W, AZ	C	Christiansen and Yeats, 1992			13	8	4.3E-6	7.65E-7	0.000118	0.00017	0.00063	0.00017
F0704	N	normal fault, 33N, 113W, AZ	S	combined offset rate (3 GCN data)					4.72E-6	2.29E-6	0.0000709	0.00161	0.000526	0.128
F0705	N	normal fault, 33N, 113W, AZ	C	Dickinson, 1979			30-15	5-1	0.00166	0.0285	0.0331	0.0868	0.314	1.17
F0705	N	normal fault, 33N, 113W, AZ	B	Shafiqullah et al., 1980			~15	8	4.3E-6	7.65E-7	0.000118	0.00017	0.00063	0.00017
F0705	N	normal fault, 33N, 113W, AZ	C	Christiansen and Yeats, 1992			13	8	4.3E-6	7.65E-7	0.000118	0.00017	0.00063	0.00017
F0705	N	normal fault, 33N, 113W, AZ	S	combined offset rate (3 GCN data)					4.72E-6	2.29E-6	0.0000709	0.00161	0.000526	0.128
F0707	N	normal fault, 33N, 113W, AZ	C	Dickinson, 1979			30-15	5-1	0.00166	0.0285	0.0331	0.0868	0.314	1.17
F0707	N	normal fault, 33N, 113W, AZ	B	Shafiqullah et al., 1980			~15	8	4.3E-6	7.65E-7	0.000118	0.00017	0.00063	0.00017
F0707	N	normal fault, 33N, 113W, AZ	C	Christiansen and Yeats, 1992			13	8	4.3E-6	7.65E-7	0.000118	0.00017	0.00063	0.00017
F0707	N	normal fault, 33N, 113W, AZ	C	Stewart, 1998			15-10	8	4.3E-6	7.65E-7	0.000118	0.00017	0.00063	0.00017
F0707	N	normal fault, 33N, 113W, AZ	S	combined offset rate (4 GCN data)					3.71E-6	2.29E-6	0.0000414	0.0000588	0.000211	0.0000566
F0701	N	normal fault, 34-35N, 113W, AZ	C	Stewart, 1978	2-5		13-11		0.128	0.289	0.292	0.293	0.465	0.0857
F0701	N	normal fault, 34-35N, 113W, AZ	C	Dickinson, 1979			30-15	5-1	0.00166	0.0285	0.0331	0.0868	0.314	1.17
F0701	N	normal fault, 34-35N, 113W, AZ	S	combined offset rate (2 GCN data)					0.00205	0.00198	0.0903	0.16	0.437	0.756
F0703	N	normal fault, 34N, 111-112W, AZ	C	Dickinson, 1979			30-15	5-1	0.00166	0.0285	0.0331	0.0868	0.314	1.17
F0703	N	normal fault, 34N, 111-112W, AZ	C	Christiansen and Yeats, 1992			13	8	4.3E-6	7.65E-7	0.000118	0.00017	0.00063	0.00017
F0703	N	normal fault, 34N, 111-112W, AZ	S	combined offset rate (2 GCN data)					7.32E-6	2.29E-6	0.000152	0.0162	0.0911	0.416
F0698	N	normal fault, 35N, 114W, AZ	C	Stewart, 1978	2-5		13-11		0.128	0.289	0.292	0.293	0.465	0.0857
F0698	N	normal fault, 35N, 114W, AZ	C	Dickinson, 1979			30-15	5-1	0.00166	0.0285	0.0331	0.0868	0.314	1.17
F0698	N	normal fault, 35N, 114W, AZ	S	combined offset rate (2 GCN data)					0.00205	0.00198	0.0903	0.16	0.437	0.756
F0702	N	normal fault, 36N, 112W, AZ	S	combined offset rate (0 GCN data)					0.000304	0.00102	0.183	0.25	1.09	0.343
F1636	N	normal fault, Kofa Mountains, AZ	A	Sherrod and Tosdal, 1991	0.15-1.5		22	20	1.73E-6	1.12E-6	0.0000482	0.0000734	0.000288	0.0000816
F1636	N	normal fault, Kofa Mountains, AZ	C	Christiansen and Yeats, 1992			13	8	4.3E-6	7.65E-7	0.000118	0.00017	0.00063	0.00017
F1636	N	normal fault, Kofa Mountains, AZ	S	combined offset rate (2 GCN data)					1.4E-6	5.12E-7	0.0000369	0.00162	0.000257	0.0335
F1637	N	normal fault, Kofa Mountains, AZ	A	Sherrod and Tosdal, 1991	0.15-1.5		22	20	1.73E-6	1.12E-6	0.0000482	0.0000734	0.000288	0.0000816
F1637	N	normal fault, Kofa Mountains, AZ	C	Christiansen and Yeats, 1992			13	8	4.3E-6	7.65E-7	0.000118	0.00017	0.00063	0.00017
F1637	N	normal fault, Kofa Mountains, AZ	S	combined offset rate (2 GCN data)					1.4E-6	5.12E-7	0.0000369	0.00162	0.000257	0.0335
F1638	N	normal fault, Kofa Mountains, AZ	A	Sherrod and Tosdal, 1991	0.15-1.5		22	20	1.73E-6	1.12E-6	0.0000482	0.0000734	0.000288	0.0000816
F1638	N	normal fault, Kofa Mountains, AZ	C	Christiansen and Yeats, 1992			13	8	4.3E-6	7.65E-7	0.000118	0.00017	0.00063	0.00017
F1638	N	normal fault, Kofa Mountains, AZ	S	combined offset rate (2 GCN data)					1.4E-6	5.12E-7	0.0000369	0.00162	0.000257	0.0335
F1639	N	normal fault, Kofa Mountains, AZ	A	Sherrod and Tosdal, 1991	0.15-1.5		22	20	1.73E-6	1.12E-6	0.0000482	0.0000734	0.000288	0.0000816
F1639	N	normal fault, Kofa Mountains, AZ	C	Christiansen and Yeats, 1992			13	8	4.3E-6	7.65E-7	0.000118	0.00017	0.00063	0.00017
F1639	N	normal fault, Kofa Mountains, AZ	S	combined offset rate (2 GCN data)					1.4E-6	5.12E-7	0.0000369	0.00162	0.000257	0.0335
F1633	N	normal fault, Trigo Mountains, AZ	C	Christiansen and Yeats, 1992			13	8	4.3E-6	7.65E-7	0.000118	0.00017	0.00063	0.00017
F1633	N	normal fault, Trigo Mountains, AZ	S	combined offset rate (1 GCN data)					5.11E-6	5.1E-7	0.000149	0.0364	0.399	0.157
F1356	N	Oak Creek normal fault, AZ [see F1355T]	A	Holm and Cloud, 1990	0.3		6		0.0328	0.0493	0.05	0.0504	0.0699	0.00944
F1356	N	Oak Creek normal fault, AZ [see F1355T]	S	combined offset rate (1 GCN data)					0.00146	0.0494	0.0512	0.092	0.463	0.176
F1262	N	Toroweap normal fault, AZ (see F0515N)	C	Haller et al., 2002 (997bcd = S part, Sevier/Toro	0.0065		0.1-0.025	0	0.0276	0.0592	0.0909	0.108	0.268	0.0649
F1262	N	Toroweap normal fault, AZ (see F0515N)	S	combined offset rate (1 GCN data)					0.00232	0.00187	0.0937	0.129	0.405	0.152
F0616	D	Virgin-Beaver Dam-Piedmont-Castle Cliff d., NV-AZ	A	Shafiqullah et al., 1980				14-11	3.16E-6	1.97E-7	0.0000866	0.000125	0.000465	0.000126
F0616	D	Virgin-Beaver Dam-Piedmont-Castle Cliff d., NV-AZ	C	Rehrig, 986			<35	>16	1.07E-6	1.27E-7	0.000032	0.0000525	0.000222	0.000061
F0616	D	Virgin-Beaver Dam-Piedmont-Castle Cliff d., NV-AZ	C	Oldow et al., 1989			~15	~11	3.59E-6	5.9E-7	0.0000983	0.000142	0.000524	0.000142
F0616	D	Virgin-Beaver Dam-Piedmont-Castle Cliff d., NV-AZ	A	Axen et al., 1990	24		14-5.3	<5.3	1.71	1.85	2.49	2.68	4.35	0.768
F0616	D	Virgin-Beaver Dam-Piedmont-Castle Cliff d., NV-AZ	C	Bartley and Glazner, 1991			15	11	3.59E-6	5.9E-7	0.0000983	0.000142	0.000524	0.000142
F0616	D	Virgin-Beaver Dam-Piedmont-Castle Cliff d., NV-AZ	A	Bohannon et al., 1993	8-12		~13	0	0.564	0.767	0.769	0.77	0.983	0.107
F0616	D	Virgin-Beaver Dam-Piedmont-Castle Cliff d., NV-AZ	S	combined offset rate (2* GCN data)					5.74E-6	5.71E-7	0.000179	0.608	3.86	2.86
F0697	N	Wheeler normal fault, AZ	C	Stewart, 1978	2-5		13-11		0.128	0.289	0.292	0.293	0.465	0.0857
F0697	N	Wheeler normal fault, AZ	A	Lucchitta, 1979	0.42		5.5	0	0.074	0.0764	0.0764	0.0764	0.0787	0.00119
F0697	N	Wheeler normal fault, AZ	S	combined offset rate (2 GCN data)					0.0416	0.0765	0.0766	0.113	0.403	0.131
F0036	R	Agua Blanca dextral fault, B.C.	A	Allen et al., 1960	11~23		<135		0.0959	0.156	0.252	0.942	4.93	5.27
F0036	R	Agua Blanca dextral fault, B.C.	S	combined offset rate (1 GCN data)					0.0808	0.157	0.78	6.5	37.9	11.1
F1942	D	Canada David-Monte Blanco detachment, B.C.	S	combined offset rate (0 GCN data)					0.0453	0.0499	1.17	3.93	30.6	7.45
F1944	D	Cerro Centinela detachment, B.C.	S	combined offset rate (0 GCN data)					0.0453	0.0499	1.17	3.93	30.6	7.45
F1429	R	Cerro Prieto tr., 31-32N, Gulf of California-B.C.	B	DeMets et al., 1987 [-Agua Blanca slip]	<160		3.4	0	1.18	0.0208	23.5	23.6	46.2	13.6
F1429	R	Cerro Prieto tr., 31-32N, Gulf of California-B.C.	B	Abbott and Smith, 1989	375	15	60?-36.6	0	5.77	7.06	7.76	7.87	10.2	1.25
F1429	R	Cerro Prieto tr., 31-32N, Gulf of California-B.C.	S	combined offset rate (2 GCN data)					0.964	7.13	9.32	16	44.9	12.8
F1943	D	detachment in eastern Sierra Juarez, B.C.	S	combined offset rate (0 GCN data)					0.0453	0.0499	1.17	3.93	30.6	7.45
F1017	D	listric n. f., E side Sierra San Pedro Martir,B.C.	C	Henry, 1989			12	9	4.39E-6	2.52E-7	0.00012	0.000174	0.000642	0.000174
F1017	D	listric n. f., E side Sierra San Pedro Martir,B.C.	B	O'Connor and Chase, 1989 (throw and throw rate)	5		14-6	<6	0.328	0.411	0.5	0.531	0.868	0.147
F1017	D	listric n. f., E side Sierra San Pedro Martir,B.C.	S	combined offset rate (2 GCN data)					6.95E-6	5.71E-7	0.000223	0.564	3.83	2.84
F1018	N	n. f., W side of Sierra San Pedro Martir, B.C.	C	Henry, 1989			12	9	3.83E-6	6.58E-7	0.000105	0.000151	0.00056	0.000151
F1018	N	n. f., W side of Sierra San Pedro Martir, B.C.	B	O'Connor and Chase, 1989	0.8		14-6	<6	0.055	0.0638	0.08	0.085	0.136	0.0226
F1018	N	n. f., W side of Sierra San Pedro Martir, B.C.	S	combined offset rate (2 GCN data)					5.63E-6	4.4E-7	0.000192	0.0457	0.367	0.143
F2001	R	San Clemente-San Isidro de. f., off B.C. [F1863R]	S	combined offset rate (0 GCN data)					0.0381	0.00713	6.18	11.6	42.8	12.6
F2002	R	San Diego Trough dextral f, off CA [.NE.F0820R]	S	combined offset rate (0 GCN data)					0.0381	0.00713	6.18	11.6	42.8	12.6
F1863	R	Santa Catalina dextral f., off B.C. [F2001R]	B	Crouch and Suppe, 1993 (transform phase)	230-270		<21		11.9	13.1	22.6	37.1	U	36.6
F1863	R	Santa Catalina dextral f., off B.C. [F2001R]	S	combined offset rate (1 GCN data)					0.108	2.29E-6	16	22.8	112	29
F1430	D	spreading rise under Colorado R. delta, 32N, B.C.	B	DeMets et al., 1987 [-Elsinore/Laguna Salada, -Ag	<160		3.4	0	1.18	0.00695	23.5	23.6	46.2	13.6
F1430	D	spreading rise under Colorado R. delta, 32N, B.C.	B	Abbott and Smith, 1989 [-Elsinore/Laguna Salada,	<375		60?-36.6	0	0.192	0.00129	3.84	3.93	8.57	2.38
F1430	D	spreading rise under Colorado R. delta, 32N, B.C.	S	combined offset rate (2 GCN data)					0.277	0.0429	6.7	13.8	44.8	14
F1603	T	Beufort Ra.-Cameron Ri.-President thrust, BC	A	England and Calon, 1991	~2.2		68-40	36.6	4.45E-7	1.02E-7	0.0000121	0.0000175	0.0000646	0.0000175
F1603	T	Beufort Ra.-Cameron Ri.-President thrust, BC	S	combined offset rate (1 GCN data)					5.06E-7	8.15E-8	0.000013	0.0235	0.131	0.181
F1606	T	Cowichan Lake thrust, BC	A	England and Calon, 1991	~1.4		68-40	36.6	4.45E-7	1.02E-7	0.0000121	0.0000175	0.0000646	0.0000175
F1606	T	Cowichan Lake thrust, BC	S	combined offset rate (1 GCN data)					5.06E-7	8.15E-8	0.000013	0.0235	0.131	0.181
F1610	P	W. Coast-W. San Juan-Survey Mtn. plate, BC	B	England and Calon, 1991 (trace; 28d dip in Lithop	large		68-40	36.6	1.22E-6	5.58E-8	0.0000334	0.0000481	0.000177	0.0000479
F1610	P	W. Coast-W. San Juan-Survey Mtn. plate, BC	S	combined offset rate (1 GCN data)					1.63E-6	2.86E-7	0.000039	0.434	5.41	1.41
F0429	D	Amargosa-Death Valley detachment fault, CA	A	Hooke, 1972 (neotectonic rate)	0.15-0.23		0.041	0	3.89	5.18	6.4	11.2	53.9	17.4
F0429	D	Amargosa-Death Valley detachment fault, CA	A	Troxel and Butler, 1980	>1.8		8.8-7	0	0.312	0.477	1.47	4.31	31.8	7.8
F0429	D	Amargosa-Death Valley detachment fault, CA	B	Snow and White, 1990 [total Cottonwood/Funeral se	<70		<~35	>~4	4.1E-6	8.39E-7	0.000125	0.000207	0.000892	0.000246
F0429	D	Amargosa-Death Valley detachment fault, CA	A	Holm et al., 1992 (15-20 km unroofing)	>15-20		10-9		1.31	2.08	3.76	8.15	41.4	10.8
F0429	D	Amargosa-Death Valley detachment fault, CA	C	Wernicke, 1992			8	4	9.87E-6	8.39E-7	0.000272	0.000396	0.00148	0.000401
F0429	D	Amargosa-Death Valley detachment fault, CA	C	Stewart, 1998			<14	>4	4.1E-6	8.39E-7	0.000125	0.000207	0.000892	0.000246
F0429	D	Amargosa-Death Valley detachment fault, CA	S	combined offset rate (3* GCN data)					0.0000888	2.29E-6	5.17	6.62	22	9.49
F1986	N	Antelope Valley normal fault, NV-CA	C	dePolo, 1998	0.0058		.012-.004	0	0.273	0.58	0.733	0.807	1.63	0.346
F1986	N	Antelope Valley normal fault, NV-CA	S	combined offset rate (1 GCN data)					0.0029	8.67E-8	0.679	0.726	1.61	0.397
F1988	T	Bald Mountain-Big Lagoon thrust fault, OR-CA	C	Petersen et al., 1996	0.287		~1?	0	0.145	0.21	0.283	0.522	1.75	2.7
F1988	T	Bald Mountain-Big Lagoon thrust fault, OR-CA	S	combined offset rate (1 GCN data)					0.0247	2.29E-6	0.281	0.525	2.02	2.51
F1987	N	Battle Creek normal fault, CA	S	combined offset rate (0 GCN data)					0.000304	0.00102	0.183	0.25	1.09	0.343
F0008	L	Big Pine sinistral fault, CA [see paleo-N]	A	Kahle, 1966	<6.44		5.9-1.8		0.0422	0.0166	0.837	0.933	2.56	0.658
F0008	L	Big Pine sinistral fault, CA [see paleo-N]	B	Bohannon, 1975	14		~20	~14	5.22E-6	2.74E-7	0.000143	0.000206	0.000761	0.000206
F0008	L	Big Pine sinistral fault, CA [see paleo-N]	B	Bohannon and Howell, 1982	15		19.6-17.4		0.739	0.807	0.811	0.812	0.888	0.0389
F0008	L	Big Pine sinistral fault, CA [see paleo-N]	C	Stewart and Crowell, 1992	12		11.2-5.3		1.06	1.16	1.45	1.52	2.22	0.338
F0008	L	Big Pine sinistral fault, CA [see paleo-N]	C	Petersen and Wesnousky, 1994	~13~16		1.8-6		2.26	2.77	3.72	4.15	7.71	1.53
F0008	L	Big Pine sinistral fault, CA [see paleo-N]	S	combined offset rate (4* GCN data)					0.745	0.809	1.18	1.41	2.78	1.05
F0403	R	Blackwater-Calico-Hidalgo dextral f, CA	A	Dibblee, 1968b	4.1		<10		0.252	0.375	0.747	2.48	14.9	9.2
F0403	R	Blackwater-Calico-Hidalgo dextral f, CA	C	Garfunkel, 1974	10-20		20		0.376	0.672	0.75	0.81	1.6	0.342
F0403	R	Blackwater-Calico-Hidalgo dextral f, CA	B	Dokka and Travis, 1990a [revised initiation]	8.2-9.6		10-6	0	0.489	0.817	0.944	0.966	1.54	0.287
F0403	R	Blackwater-Calico-Hidalgo dextral f, CA	S	combined offset rate (3 GCN data)					0.346	0.662	0.776	1.73	14.7	5.34
F0934	T	blind thrust of Kettleman Hls-Anticline Rdg, CA	A	Namson et al., 1983	2.5		3	0	0.626	0.792	0.833	0.859	1.24	0.158
F0934	T	blind thrust of Kettleman Hls-Anticline Rdg, CA	A	Wentworth et al., 1983	9.1		<~10	0	0.559	0.837	1.65	4.8	30.7	13.3
F0934	T	blind thrust of Kettleman Hls-Anticline Rdg, CA	A	Bloch et al., 1993	>1.7		16-6	0	0.148	0.229	0.723	1.02	3.51	0.927
F0934	T	blind thrust of Kettleman Hls-Anticline Rdg, CA	S	combined offset rate (3 GCN data)					0.612	0.785	0.823	0.888	1.27	1.42
F1849	L	Blue Cut sinstral fault, CA	S	combined offset rate (0 GCN data)					0.00356	0.00356	2.23	4.33	15.4	4.56
F1851	T	Blue Ridge-Rumsey Hills-Salt Arroyo thrust, CA	A	Unruh and Moores, 1992	~2?		<1	0	0.999	1.81	3.58	8.99	58.3	19
F1851	T	Blue Ridge-Rumsey Hills-Salt Arroyo thrust, CA	S	combined offset rate (1 GCN data)					0.346	2.29E-6	3.4	8.63	56.4	18.6
F2271	D	Boundary Peak detachment(?) fault, CA-NV	S	combined offset rate (0 GCN data)					0.0453	0.0499	1.17	3.93	30.6	7.45
F1995	R	Brawley dextral zone, CA (see D above)	B	DeMets et al., 1987 [-San Jacinto, -Elsinore/LS,	<139		3.4	0	1.02	0.0164	20.4	20.4	39.9	11.8
F1995	R	Brawley dextral zone, CA (see D above)	B	Abbott and Smith, 1989 [-Elsinore/Laguna Salada,	<325		60?-36.6	0	0.166	0.00112	3.33	3.41	7.43	2.06
F1995	R	Brawley dextral zone, CA (see D above)	S	combined offset rate (2 GCN data)					0.258	0.011	6.29	12.5	39.1	12.2
F1995	D	Brawley extensional zone, CA (see R below)	B	DeMets et al., 1987 [-San Jacinto, -Elsinore/LS,	<80		3.4	0	0.588	0.0115	11.8	11.8	23.6	6.88
F1995	D	Brawley extensional zone, CA (see R below)	B	Abbott and Smith, 1989 [-Elsinore/Laguna Salada,	<188		60?-36.6	0	0.0963	0.000652	1.93	1.97	4.3	1.19
F1995	D	Brawley extensional zone, CA (see R below)	S	combined offset rate (2 GCN data)					0.147	0.0429	3.44	7.04	22.8	7.16
F1989	R	Burnt Mountain dextral fault, CA	S	combined offset rate (0 GCN data)					0.0381	0.00713	6.18	11.6	42.8	12.6
F0831	R	Carneros-Franklin-Sunol-northern Calaveras f, CA	C	Fox et al., 1985	20-35		<~15	0	1.55	2.21	3.64	8.88	55.8	18.4
F0831	R	Carneros-Franklin-Sunol-northern Calaveras f, CA	A	Sarna_Wojcicki et al., 1986	18		6	0	2.55	2.96	3	3.02	3.61	0.27
F0831	R	Carneros-Franklin-Sunol-northern Calaveras f, CA	A	Kelson et al., 1996	.040-.072		.0105-.0145	0	2.63	4.4	4.48	4.52	6.61	1.01
F0831	R	Carneros-Franklin-Sunol-northern Calaveras f, CA	S	combined offset rate (3 GCN data)					2.59	3.04	3.15	3.41	5.61	1.77
F1990	T	Casmalia-Orcutt Frontal reverse fault, CA	S	combined offset rate (0 GCN data)					0.000958	0.000519	0.228	0.544	2.41	0.691
F1991	N	Cedar Mountain normal fault, CA	S	combined offset rate (0 GCN data)					0.000304	0.00102	0.183	0.25	1.09	0.343
F0380	R	Chino-Central Ave. dextral f, CA [see T above]	B	McCulloh et al., 2000	<2		33.7		0.00153	0.000797	0.0298	0.0316	0.0727	0.02
F0380	R	Chino-Central Ave. dextral f, CA [see T above]	A	SCEC Working Group C, 2001 (neotectonic rate)	0.004-0.006		.0095-.0115		0.0627	0.483	0.511	0.551	1.3	0.31
F0380	R	Chino-Central Ave. dextral f, CA [see T above]	S	combined offset rate (2 GCN data)					0.00377	0.0303	0.231	0.601	1.49	2.65
F0380	T	Chino-Central Avenue thrust, CA [see R below]	B	Yerkes et al., 1965 (neotectonic rate)	0.37-0.74		6-4	0	0.0595	0.106	0.111	0.114	0.184	0.0316
F0380	T	Chino-Central Avenue thrust, CA [see R below]	A	Heath et al., 1982 (neotectonic rate)	0.008		~0.125	0	0.0529	0.0692	0.0762	0.109	0.243	0.869
F0380	T	Chino-Central Avenue thrust, CA [see R below]	S	combined offset rate (2 GCN data)					0.0576	0.0733	0.0832	0.0976	0.159	0.404
F1992	T	Clamshell-Sawpit Canyon thrust fault, CA	S	combined offset rate (0 GCN data)					0.000958	0.000519	0.228	0.544	2.41	0.691
F0889	L	Cleghorn sinistral fault, CA	A	Meisling and Weldon, 1982	3.5-4		4-2	0	0.832	1.07	1.25	1.35	2.43	0.443
F0889	L	Cleghorn sinistral fault, CA	S	combined offset rate (1 GCN data)					0.812	1.08	1.26	1.48	3.12	1.2
F0452	N	Clemens Well nor.(?) f., Orocopia Mountains, CA	B	Bohannon, 1975			~25	~19	1.81E-6	2.74E-7	0.0000496	0.0000715	0.000264	0.0000713
F0452	N	Clemens Well nor.(?) f., Orocopia Mountains, CA	B	Tennyson, 1989			~24	~20	1.73E-6	1.12E-6	0.0000482	0.0000734	0.000288	0.0000816
F0452	N	Clemens Well nor.(?) f., Orocopia Mountains, CA	S	combined offset rate (2 GCN data)					1.05E-6	1.84E-7	0.0000271	0.00225	0.000192	0.0398
F1993	R	Collayomi dextral fault, CA	S	combined offset rate (0 GCN data)					0.0381	0.00713	6.18	11.6	42.8	12.6
F1562	R	Death Valley-Furnace Creek dextral f (S sec.), CA	C	Cao et al., 2003?	35		~9	0	3.49	3.86	3.89	3.9	4.38	0.225
F1562	R	Death Valley-Furnace Creek dextral f (S sec.), CA	S	combined offset rate (1 GCN data)					0.19	3.86	3.92	7.04	35.8	8.87
F1994	N	Deep Springs normal fault, CA	S	combined offset rate (0 GCN data)					0.000304	0.00102	0.183	0.25	1.09	0.343
F2249	R	dextral(?) fault, 38N, 118W, CA-NV	S	combined offset rate (0 GCN data)					0.0381	0.00713	6.18	11.6	42.8	12.6
F1406	D	domino-style extension z. NW of Saline Valley, CA	A	Burchfiel et al., 1987	8-10		3	0	2.17	2.85	3	3.09	4.55	0.612
F1406	D	domino-style extension z. NW of Saline Valley, CA	S	combined offset rate (1 GCN data)					1.77	2.85	2.99	3.13	4.7	1.67
F1954	R	Eagle Lake dextral fault, CA [c.f. F0684N]	S	combined offset rate (0 GCN data)					0.0381	0.00713	6.18	11.6	42.8	12.6
F1997	R	Earthquake Valley dextral fault, CA	S	combined offset rate (0 GCN data)					0.0381	0.00713	6.18	11.6	42.8	12.6
F1963	N	East Goose Lake graben normal fault, CA-OR	S	combined offset rate (0 GCN data)					0.000304	0.00102	0.183	0.25	1.09	0.343
F2118	N	East Tahoe normal fault, CA-NV	S	combined offset rate (0 GCN data)					0.000304	0.00102	0.183	0.25	1.09	0.343
F0439	L	eastern Garlock sinistral fault, CA [see F0539L]	B	Davis and Burchfiel, 1973	64		<144		0.456	0.455	0.887	2.78	16.5	9.68
F0439	L	eastern Garlock sinistral fault, CA [see F0539L]	A	Kistler and Peterman, 1978	52		<208		0.256	0.256	0.499	1.71	9.59	7.35
F0439	L	eastern Garlock sinistral fault, CA [see F0539L]	A	Carter, 1982	43		3.8-3		11.3	11.7	12.9	13.4	18.5	1.97
F0439	L	eastern Garlock sinistral fault, CA [see F0539L]	C	Petersen and Wesnousky, 1994 (neotectonic rate)	16-20		3-0.65	0	5.15	6.93	9.85	11.6	25.5	5.57
F0439	L	eastern Garlock sinistral fault, CA [see F0539L]	C	Petersen and Wesnousky, 1994 (neotectonic rate)	.081-.106		.01-.0138	0	6.18	7.58	8.98	11.8	34.4	11.5
F0439	L	eastern Garlock sinistral fault, CA [see F0539L]	C	Petersen and Wesnousky, 1994 (neotectonic rate)	.043-.08		.03-.034	0	1.17	2	2.05	2.09	3.23	0.52
F0439	L	eastern Garlock sinistral fault, CA [see F0539L]	S	combined offset rate (6 GCN data)					1.91	11.6	12	11.9	15.3	2.36
F1550	D	Eastern Panamint detachment fault system, CA	A	McKenna and Hodges, 1990 [25-55 total for 2 syste	<55		11.2-5.3		0.167	0.00417	3.33	3.49	8.2	2.2
F1550	D	Eastern Panamint detachment fault system, CA	B	Snow and White, 1990 [total Cottonwood/Funeral se	<70		<~35	>~4	4.1E-6	8.39E-7	0.000125	0.000207	0.000892	0.000246
F1550	D	Eastern Panamint detachment fault system, CA	S	combined offset rate (2 GCN data)					5.1E-6	5.71E-7	0.000147	0.341	4.66	1.71
F1998	L	Elmore Ranch sinistral fault, CA	S	combined offset rate (0 GCN data)					0.00356	0.00356	2.23	4.33	15.4	4.56
F0799	R	Elsinore-Laguna Salada dextral fault, CA-B.C.	A	Kennedy, 1977 (neotectonic rate)	>5		0.7	0	7.29	18.2	19.5	22.2	48.4	11.2
F0799	R	Elsinore-Laguna Salada dextral fault, CA-B.C.	B	Crowell and Sylvester, 1979	40		<49		0.761	0.953	1.63	4.61	28.7	12.8
F0799	R	Elsinore-Laguna Salada dextral fault, CA-B.C.	B	Lowman, 1980	<3		180		0.000425	0.00017	0.00834	0.00858	0.0186	0.0052
F0799	R	Elsinore-Laguna Salada dextral fault, CA-B.C.	A	Pinault and Rockwell, 1984 (neotectonic, est. soi	0.040		.012-.008?	0	2.59	3.85	4	4.07	5.87	0.838
F0799	R	Elsinore-Laguna Salada dextral fault, CA-B.C.	A	Millman and Rockwell, 1986 (neotectonic rate)	>0.152		<0.040	0	5.18	7.93	22.9	37.2	U	39.4
F0799	R	Elsinore-Laguna Salada dextral fault, CA-B.C.	A	Millman and Rockwell, 1986 (neotectonic rate)	<0.933		>0.100	0	0.103	0.599	2.11	3.12	11.2	5.2
F0799	R	Elsinore-Laguna Salada dextral fault, CA-B.C.	C	Stewart and Crowell, 1992	40		66.4-57.8		0.482	0.642	0.644	0.645	0.814	0.0846
F0799	R	Elsinore-Laguna Salada dextral fault, CA-B.C.	A	Hull and Nicholson, 1992	<15		10.6		0.0355	0.00263	0.708	0.708	1.39	0.41
F0799	R	Elsinore-Laguna Salada dextral fault, CA-B.C.	C	Petersen and Wesnousky, 1994 (neotectonic rate)	>0.01		.0023-.0027	0	1.8	18.3	16.9	18.6	46.6	12.3
F0799	R	Elsinore-Laguna Salada dextral fault, CA-B.C.	C	WGCEP, 1995 (Temecula section)	>(.009-.011)		.0024-.002	0	4.5	7.38	18.3	21.3	54.5	13.8
F0799	R	Elsinore-Laguna Salada dextral fault, CA-B.C.	S	combined offset rate (10 GCN data)					3.44	5.98	5.77	5.64	7.49	1.26
F1552	D	Emigrant-Surprise detachment f., Panamint R., CA	B	Hodges et al., 1990	4		~15-6.1	<3.6	0.236	0.312	0.379	0.404	0.674	0.119
F1552	D	Emigrant-Surprise detachment f., Panamint R., CA	A	Labotka and Albee, 1990 [2.2-2.4 on Surprise stra	>2.2		<70	>10.6	1.57E-6	1.72E-7	0.0000474	0.0000781	0.000332	0.0000913
F1552	D	Emigrant-Surprise detachment f., Panamint R., CA	B	Snow and White, 1990 [total Cottonwood/Funeral se	<70		<~35	>~4	4.1E-6	8.39E-7	0.000125	0.000207	0.000892	0.000246
F1552	D	Emigrant-Surprise detachment f., Panamint R., CA	S	combined offset rate (2* GCN data)					5.77E-6	5.71E-7	0.000188	0.375	2.85	2.39
F1999	R	Eureka Peak dextral fault, CA	S	combined offset rate (0 GCN data)					0.0381	0.00713	6.18	11.6	42.8	12.6
F2000	T	Fickle Hill thrust fault, CA	S	combined offset rate (0 GCN data)					0.000958	0.000519	0.228	0.544	2.41	0.691
F1531	R	Fish Lake-Death Vly-Furnace Crk dextral f, NV-CA	C	Christiansen and Yeats, 1992	50-80		~15		3.01	4.32	4.33	4.34	5.69	0.682
F1531	R	Fish Lake-Death Vly-Furnace Crk dextral f, NV-CA	S	combined offset rate (1 GCN data)					0.12	5.71E-7	4.43	8.19	37.5	9.84
F2037	R	Garberville-Briceland dex. f, CA [see F0930R]	S	combined offset rate (0 GCN data)					0.0381	0.00713	6.18	11.6	42.8	12.6
F0688	N	Genoa normal fault, CA	C	Stewart, 1978	2-5		13-11		0.128	0.289	0.292	0.293	0.465	0.0857
F0688	N	Genoa normal fault, CA	C	Cole and Armentrout, 1979				>5.3	2.69E-6	3.06E-7	0.0000817	0.000135	0.000576	0.000158
F0688	N	Genoa normal fault, CA	S	combined offset rate (2 GCN data)					3.35E-6	8.16E-8	0.000113	0.0397	0.381	0.134
F2038	N	Gillem normal fault, CA	S	combined offset rate (0 GCN data)					0.000304	0.00102	0.183	0.25	1.09	0.343
F0404	R	Gravel H-Harper L-Camp Rock-Emerson-Copper M f,CA	A	Dibblee, 1968b	<3.2		10		0.00779	0.0855	0.156	0.299	1.06	2.02
F0404	R	Gravel H-Harper L-Camp Rock-Emerson-Copper M f,CA	B	Dokka and Travis, 1990a [revised initiation]	1.6-4		10-6	0	0.106	0.243	0.287	0.304	0.591	0.127
F0404	R	Gravel H-Harper L-Camp Rock-Emerson-Copper M f,CA	C	Petersen and Wesnousky, 1994 (neotectonic rate)	.002-.006		0.009	0	0.0481	0.46	0.514	0.568	1.45	0.36
F0404	R	Gravel H-Harper L-Camp Rock-Emerson-Copper M f,CA	A	Rubin and Sieh, 1997 (neotectonic rate)	<0.006		0.0089	0	0.0298	0.342	0.454	0.515	1.41	0.366
F0404	R	Gravel H-Harper L-Camp Rock-Emerson-Copper M f,CA	S	combined offset rate (4 GCN data)					0.1	0.227	0.232	0.246	0.459	0.0919
F2039	T	Great Valley thrust fault 1, CA	S	combined offset rate (0 GCN data)					0.000958	0.000519	0.228	0.544	2.41	0.691
F2040	T	Great Valley thrust fault 2, CA	S	combined offset rate (0 GCN data)					0.000958	0.000519	0.228	0.544	2.41	0.691
F2041	T	Great Valley thrust fault 5, CA	S	combined offset rate (0 GCN data)					0.000958	0.000519	0.228	0.544	2.41	0.691
F2042	T	Great Valley thrust fault(?) 6, CA	S	combined offset rate (0 GCN data)					0.000958	0.000519	0.228	0.544	2.41	0.691
F2043	T	Great Valley thrust fault 7, CA	S	combined offset rate (0 GCN data)					0.000958	0.000519	0.228	0.544	2.41	0.691
F2044	T	Great Valley thrust fault 8, CA	S	combined offset rate (0 GCN data)					0.000958	0.000519	0.228	0.544	2.41	0.691
F2045	T	Great Valley thrust fault 9, CA	S	combined offset rate (0 GCN data)					0.000958	0.000519	0.228	0.544	2.41	0.691
F2046	T	Great Valley thrust fault 10, CA	S	combined offset rate (0 GCN data)					0.000958	0.000519	0.228	0.544	2.41	0.691
F2047	T	Great Valley thrust fault 11, CA	S	combined offset rate (0 GCN data)					0.000958	0.000519	0.228	0.544	2.41	0.691
F2048	T	Great Valley thrust fault 12, CA	S	combined offset rate (0 GCN data)					0.000958	0.000519	0.228	0.544	2.41	0.691
F1551	D	Harrisburg detachment fault, Panamint Range, CA	B	Hodges et al., 1990 [6-8 km unroofing]	8-16		16.6-11.2?	>9.7	1.71E-6	1.89E-7	0.0000517	0.0000852	0.000363	0.0000997
F1551	D	Harrisburg detachment fault, Panamint Range, CA	B	Snow and White, 1990 [total Cottonwood/Funeral se	<70		<~35	>~4	4.1E-6	8.39E-7	0.000125	0.000207	0.000892	0.000246
F1551	D	Harrisburg detachment fault, Panamint Range, CA	C	Hodges and Walker, 1992			<101	>11	1.51E-6	1.97E-7	0.0000458	0.0000754	0.000321	0.0000883
F1551	D	Harrisburg detachment fault, Panamint Range, CA	C	Axen et al., 1993			<~16.6	>1.6	0.0000102	1.27E-6	0.000309	0.000512	0.00219	0.000602
F1551	D	Harrisburg detachment fault, Panamint Range, CA	S	combined offset rate (4 GCN data)					1.1E-6	5.71E-7	0.0000154	0.0000235	0.0000918	0.0000251
F1664	N	Hartley Springs normal fault, CA	S	combined offset rate (0 GCN data)					0.000304	0.00102	0.183	0.25	1.09	0.343
F1955	R	Hat Creek dextral fault, CA [c.f. F2050N]	S	combined offset rate (0 GCN data)					0.0381	0.00713	6.18	11.6	42.8	12.6
F2050	N	Hat Creek normal fault, CA [c.f. F1955R]	S	combined offset rate (0 GCN data)					0.000304	0.00102	0.183	0.25	1.09	0.343
F0830	R	Hayward dextral fault, CA	C	Fox et al., 1985	~43		8	0	4.78	5.33	5.38	5.4	6.14	0.346
F0830	R	Hayward dextral fault, CA	A	Sarna_Wojcicki et al., 1986	45		6	0	6.44	7.4	7.5	7.55	8.97	0.647
F0830	R	Hayward dextral fault, CA	A	Lienkaemper et al., 1989 (neotectonic rate)	0.07-0.10		0.014	0.004	0.0183	0.0481	0.43	0.638	2.45	0.665
F0830	R	Hayward dextral fault, CA	A	Andrews et al., 1993	>0.064		0.008	0	8.57	18.3	20.2	23.1	48.5	10.8
F0830	R	Hayward dextral fault, CA	A	Borchardt, 1993	0.067		0.0083	0	7.06	8.11	8.12	8.11	9.12	0.491
F0830	R	Hayward dextral fault, CA	A	Lienkaemper and Borchardt, 1996	.060-.072		.0082-.0084	0	6.59	7.96	7.96	7.95	9.3	0.683
F0830	R	Hayward dextral fault, CA	S	combined offset rate (6 GCN data)					7.46	8.08	8.05	8.04	8.6	0.281
F0829	R	Healdsburg-Rodgers Creek dextral fault, CA	C	Fox et al., 1985	~43		8	0	4.78	5.33	5.38	5.4	6.14	0.346
F0829	R	Healdsburg-Rodgers Creek dextral fault, CA	A	Budding et al., 1991	0.002		<0.0013	0	0.443	2.25	4.4	10.4	66.6	20.3
F0829	R	Healdsburg-Rodgers Creek dextral fault, CA	S	combined offset rate (2 GCN data)					0.957	5.28	5.31	7.3	32	12.6
F0689	N	Hilton Creek normal fault, CA	C	Stewart, 1978	2-5		13-11		0.128	0.289	0.292	0.293	0.465	0.0857
F0689	N	Hilton Creek normal fault, CA	S	combined offset rate (1 GCN data)					0.000638	0.00198	0.268	0.273	0.731	0.245
F2051	T	Holser reverse fault, CA	S	combined offset rate (0 GCN data)					0.000958	0.000519	0.228	0.544	2.41	0.691
F2343	R	Homestead Valley dextral fault, CA	A	Hecker et al., 1993 (neotectonic rate)	.003-.00375		.0085-.0057	0	0.0538	0.485	0.558	0.639	1.73	0.428
F2343	R	Homestead Valley dextral fault, CA	S	combined offset rate (1 GCN data)					0.0533	0.486	0.571	1.11	3.78	3.45
F2053	R	Honey Lake dextral fault, CA [F0685N; F2225R]	C	USGS Quaternary Fault & Fold Database, 2005.01(22	.014-.018		.0125-.007	0	0.733	1.52	1.65	1.7	2.87	0.532
F2053	R	Honey Lake dextral fault, CA [F0685N; F2225R]	S	combined offset rate (1 GCN data)					0.471	1.51	1.69	3.13	23.9	5.94
F0685	N	Honey Lake normal fault, CA [see F2053R]	S	combined offset rate (0 GCN data)					0.000304	0.00102	0.183	0.25	1.09	0.343
F1940	R	Hosgri dextral f, off Sta Maria basin, CA [F0538]	A	Hamilton and Willingham, 1977	10-20		5		1.65	2.94	3	3.03	4.58	0.745
F1940	R	Hosgri dextral f, off Sta Maria basin, CA [F0538]	A	Graham and Dickinson, 1978	115		16		6.77	7.17	7.19	7.19	7.66	0.227
F1940	R	Hosgri dextral f, off Sta Maria basin, CA [F0538]	A	Hall, 1978	80-95		5		14.1	17.2	17.5	17.7	22.3	2.08
F1940	R	Hosgri dextral f, off Sta Maria basin, CA [F0538]	C	Stewart and Crowell, 1992	70-115		23.7-5.3		3.34	4.66	6.38	7.53	16.8	3.64
F1940	R	Hosgri dextral f, off Sta Maria basin, CA [F0538]	A	Steritz and Luyendyk, 1994	<20		>5	<0.020	0.0413	0.00769	0.887	1.13	3.51	0.935
F1940	R	Hosgri dextral f, off Sta Maria basin, CA [F0538]	S	combined offset rate (5 GCN data)					1.33	3.21	3.11	3.57	15.2	3.06
F1940	T	Hosgri thrust, off Sta Maria basin, CA [F0538RT]	C	McCulloch, 1987	>1		<11.2?	>3.4?	1.98E-6	2.3E-7	0.00006	0.0000992	0.000424	0.000117
F1940	T	Hosgri thrust, off Sta Maria basin, CA [F0538RT]	A	Steritz and Luyendyk, 1994 (throw rate)	>0.4		~6-~4	<0.020	0.0868	0.112	0.548	0.821	2.85	0.777
F1940	T	Hosgri thrust, off Sta Maria basin, CA [F0538RT]	S	combined offset rate (2 GCN data)					4.23E-6	1.53E-7	0.0159	0.393	2.34	0.672
F0819	R	Hunter Mt.-Panamint Vly. dextral f [F0692N], CA	A	Smith, 1979	0.020		0.010-0.020	0	0.442	1.05	1.33	1.78	5.12	3.46
F0819	R	Hunter Mt.-Panamint Vly. dextral f [F0692N], CA	A	Burchfiel et al., 1987	8-10		3	0	2.17	2.85	3	3.09	4.55	0.612
F0819	R	Hunter Mt.-Panamint Vly. dextral f [F0692N], CA	A	Zhang et al., 1990	0.025-0.040		0.015	0	1.32	2.17	2.17	2.18	3.04	0.435
F0819	R	Hunter Mt.-Panamint Vly. dextral f [F0692N], CA	S	combined offset rate (3 GCN data)					1.85	2.39	2.43	2.44	3.09	0.377
F0932	R	Hunting Crk-Berryessa-Green Vly-Concord d f, CA	C	Frizzel and Brown, 1976 (creep rate)	0.00031		.000052	0	7.86	8.64	17	22.8	71.3	17.7
F0932	R	Hunting Crk-Berryessa-Green Vly-Concord d f, CA	A	Borchardt et al., 1999 (neotectonic rate)	.0186-.0222		0.006	0	1.94	3.4	3.44	3.45	5.01	0.748
F0932	R	Hunting Crk-Berryessa-Green Vly-Concord d f, CA	S	combined offset rate (2 GCN data)					1.93	3.41	3.48	4.25	13.7	5.16
F1431	R	Imperial dextral fault, CA-B.C.	A	Winker and Kidwell, 1986	105-155		2.8	0	34.7	46.4	46.4	46.4	58.3	6
F1431	R	Imperial dextral fault, CA-B.C.	B	DeMets et al., 1987 [-Elsinore/Laguna Salada, -Ag	<160		3.4	0	1.18	0.0208	23.5	23.6	46.2	13.6
F1431	R	Imperial dextral fault, CA-B.C.	B	Abbott and Smith, 1989 [-Elsinore/Laguna Salada,	<375		60?-36.6	0	0.192	0.00129	3.84	3.93	8.57	2.38
F1431	R	Imperial dextral fault, CA-B.C.	S	combined offset rate (3 GCN data)					4.69	44.4	42.7	40.6	51.2	9.33
F2054	R	Johnson Valley dextral fault, CA	S	combined offset rate (0 GCN data)					0.0381	0.00713	6.18	11.6	42.8	12.6
F1404	R	Keene Wonder (Keane Wonder) dextral fault, CA	A	Cemen and Wright, 1990	5		<14?		0.342	0.411	0.713	2.31	13.5	8.72
F1404	R	Keene Wonder (Keane Wonder) dextral fault, CA	S	combined offset rate (1 GCN data)					0.188	0.414	1.15	6.13	37.1	11.4
F1404	N	Keene Wonder (Keane Wonder) normal fault, CA	A	Reynolds et al., 1986	>1.1		<5	0	0.257	0.348	0.767	2.62	16.1	9.56
F1404	N	Keene Wonder (Keane Wonder) normal fault, CA	S	combined offset rate (1 GCN data)					0.00184	2.29E-6	0.629	2.23	13.6	8.78
F1526	T	Kramer Hills thrust, CA	A	Bartley et al., 1990b	1-3		<16	0	0.066	0.142	0.252	0.933	4.9	5.26
F1526	T	Kramer Hills thrust, CA	S	combined offset rate (1 GCN data)					0.0113	2.29E-6	0.245	0.761	3.1	3.96
F1522	T	La Panza-Ozena-Morales thrust, CA [see paleo-N]	S	combined offset rate (0 GCN data)					0.000958	0.000519	0.228	0.544	2.41	0.691
F2055	R	Lake Mountain dextral fault, CA	S	combined offset rate (0 GCN data)					0.0381	0.00713	6.18	11.6	42.8	12.6
F1979	R	Likely dextral fault, 40-41N, CA [c.f. F0683N]	S	combined offset rate (0 GCN data)					0.0381	0.00713	6.18	11.6	42.8	12.6
F0683	N	Likely normal fault, CA [see 1979R]	S	combined offset rate (0 GCN data)					0.000304	0.00102	0.183	0.25	1.09	0.343
F2359	T	Lions Head reverse fault, CA	S	combined offset rate (0 GCN data)					0.000958	0.000519	0.228	0.544	2.41	0.691
F2345	R	Little Lake dextral fault, CA	S	combined offset rate (0 GCN data)					0.0381	0.00713	6.18	11.6	42.8	12.6
F2056	T	Little Salmon (offshore) thrust fault, off CA	S	combined offset rate (0 GCN data)					0.000958	0.000519	0.228	0.544	2.41	0.691
F2057	T	Little Salmon (onshore) thrust fault, CA	S	combined offset rate (0 GCN data)					0.000958	0.000519	0.228	0.544	2.41	0.691
F0921	R	Lockhart-Lenwood-Old Woman Springs d.f., CA	B	Dokka and Travis, 1990a [revised initiation]	1.5-3		10-6	0	0.101	0.2	0.233	0.244	0.447	0.0911
F0921	R	Lockhart-Lenwood-Old Woman Springs d.f., CA	A	Strane et al., 2005	0.2625	0.04375	.1~.05	0	1.34	2.4	2.97	3.15	5.84	1.2
F0921	R	Lockhart-Lenwood-Old Woman Springs d.f., CA	A	Strane et al., 2005	1.87	0.045	<23.8	0	0.0804	0.0826	0.157	0.627	3.1	4.19
F0921	R	Lockhart-Lenwood-Old Woman Springs d.f., CA	S	combined offset rate (3 GCN data)					0.248	0.505	0.571	1.3	4.77	1.89
F2058	T	Los Alamos-West Baseline thrust fault, CA	S	combined offset rate (0 GCN data)					0.000958	0.000519	0.228	0.544	2.41	0.691
F1937	T	Los Osos thrust fault, CA	A	Lettis and Hall, 1994 (neotectonic rate)	0.20-0.33		1	0	0.12	0.193	0.261	0.484	1.63	2.59
F1937	T	Los Osos thrust fault, CA	S	combined offset rate (1 GCN data)					0.105	0.193	0.261	0.487	1.75	2.54
F0930	R	Maacama-Garberville dextral fault, CA (see F2037R	S	combined offset rate (0 GCN data)					0.0381	0.00713	6.18	11.6	42.8	12.6
F2059	T	Mad River thrust fault, CA	S	combined offset rate (0 GCN data)					0.000958	0.000519	0.228	0.544	2.41	0.691
F2083	N	Mahogany Mountain normal fault, CA-OR	S	combined offset rate (0 GCN data)					0.000304	0.00102	0.183	0.25	1.09	0.343
F2060	T	Malibu Coast reverse fault, CA [see L below]	C	Petersen and Wesnousky, 1994 (neotectonic rate)	.005-.0163		.185-.2	0	0.0147	0.0473	0.0487	0.0494	0.0878	0.0187
F2060	T	Malibu Coast reverse fault, CA [see L below]	S	combined offset rate (1 GCN data)					0.0125	0.0467	0.0505	0.121	1.2	0.316
F2060	L	Malibu Coast sinistral fault, CA [see T above]	C	Petersen and Wesnousky, 1994 (neotectonic rate)	>0.1		0.02	0	1.09	5.67	8.18	9.66	26.3	6.91
F2060	L	Malibu Coast sinistral fault, CA [see T above]	A	Treiman, 1994 (Quaternary rate)	<4		2	0	0.0502	0.194	1	1.1	2.84	0.791
F2060	L	Malibu Coast sinistral fault, CA [see T above]	A	Treiman, 1994 (neotectonic rate)	<0.005		0.010?	0	0.0209	0.199	0.362	0.731	2.93	3.3
F2060	L	Malibu Coast sinistral fault, CA [see T above]	S	combined offset rate (3 GCN data)					0.0353	0.279	0.487	0.647	1.9	0.778
F1982	R	Marsh Creek-Greenville-Arroyo Mocho f., CA	A	Sweeney, 1982 (neotectonic rate)	2		4.5	0	0.227	0.444	0.444	0.444	0.663	0.111
F1982	R	Marsh Creek-Greenville-Arroyo Mocho f., CA	A	Wright et al., 1982 (neotectonic rate)	0.09		0.18-0.125	0	0.464	0.558	0.59	0.596	0.752	0.077
F1982	R	Marsh Creek-Greenville-Arroyo Mocho f., CA	S	combined offset rate (2 GCN data)					0.429	0.531	0.544	0.616	0.702	1.3
F1956	R	Mayfield dextral fault, CA [c.f. F2049N]	S	combined offset rate (0 GCN data)					0.0381	0.00713	6.18	11.6	42.8	12.6
F2049	N	Mayfield normal fault, CA [c.f. F1956R]	S	combined offset rate (0 GCN data)					0.000304	0.00102	0.183	0.25	1.09	0.343
F0684	N	McArthur-Eagle Lake normal fault, CA [F1954R]	S	combined offset rate (0 GCN data)					0.000304	0.00102	0.183	0.25	1.09	0.343
F2062	T	McKinleyville thrust fault, CA	S	combined offset rate (0 GCN data)					0.000958	0.000519	0.228	0.544	2.41	0.691
F2063	T	Mission Ridge-Arroyo Parida-Santa Ana f, CA	C	Petersen and Wesnousky, 1994 (neotectonic rate)	0.014		.0365-.0395	0	0.312	0.369	0.369	0.369	0.424	0.0279
F2063	T	Mission Ridge-Arroyo Parida-Santa Ana f, CA	S	combined offset rate (1 GCN data)					0.0247	0.369	0.368	0.394	1.2	0.271
F2064	N	Mono Lake normal fault, CA	S	combined offset rate (0 GCN data)					0.000304	0.00102	0.183	0.25	1.09	0.343
F2358	T	Montalvo-Oakridge-Mid Channel structure, CA	S	combined offset rate (0 GCN data)					0.000958	0.000519	0.228	0.544	2.41	0.691
F2065	T	Monte Vista-Shannon thrust fault, CA	S	combined offset rate (0 GCN data)					0.000958	0.000519	0.228	0.544	2.41	0.691
F0374	R	Monterey Bay-King-N. Rinconada f, CA [F0826R]	A	Durham, 1965	17.7		<5		3.42	4.01	6.97	15	88.2	24.1
F0374	R	Monterey Bay-King-N. Rinconada f, CA [F0826R]	A	Hart, 1976	53		22		2.3	2.41	2.41	2.41	2.53	0.0593
F0374	R	Monterey Bay-King-N. Rinconada f, CA [F0826R]	C	Hart et al., 1986	56		23.8-16.4		2.37	2.41	2.79	2.82	3.38	0.305
F0374	R	Monterey Bay-King-N. Rinconada f, CA [F0826R]	C	Hart et al., 1986 (partial slip)	11		5.3-3.6		2.02	2.25	2.47	2.5	3.1	0.304
F0374	R	Monterey Bay-King-N. Rinconada f, CA [F0826R]	C	Stewart and Crowell, 1992	60		66.4-23.7		0.863	1.02	1.33	1.45	2.48	0.456
F0374	R	Monterey Bay-King-N. Rinconada f, CA [F0826R]	C	Stewart and Crowell, 1992	18		5.3-3.4		3.38	3.6	4.14	4.21	5.28	0.556
F0374	R	Monterey Bay-King-N. Rinconada f, CA [F0826R]	S	combined offset rate (6 GCN data)					2.34	2.4	2.41	2.42	2.53	0.123
F2360	T	Mount Diablo thrust, CA	C	WGCEP, 2003 {using their 30 degree dip}	5.8-9.8		9-3.4	0	0.701	1.04	1.26	1.35	2.43	0.458
F2360	T	Mount Diablo thrust, CA	S	combined offset rate (1 GCN data)					0.014	4.16E-8	1.11	1.1	2.42	0.661
F1564	T	Mule Spring-Old Mormon Spring thrust system, CA	S	combined offset rate (0 GCN data)					0.000958	0.000519	0.228	0.544	2.41	0.691
F0443	R	N Newport-Inglewood dextral f, CA [F0825R]	A	California Division of Oil and Gas, 1961	1.5		3.6-1.8	0	0.415	0.446	0.556	0.578	0.822	0.119
F0443	R	N Newport-Inglewood dextral f, CA [F0825R]	A	Yeats, 1973	3		7-4	0	0.332	0.505	0.545	0.565	0.901	0.146
F0443	R	N Newport-Inglewood dextral f, CA [F0825R]	A	Wright et al., 1973 (total offset, Inglewood)	1.4		4	0	0.278	0.34	0.35	0.356	0.467	0.0484
F0443	R	N Newport-Inglewood dextral f, CA [F0825R]	A	Freeman et al., 1992 (total offset, Huntington Be	4		7	0	0.42	0.566	0.571	0.574	0.746	0.0831
F0443	R	N Newport-Inglewood dextral f, CA [F0825R]	A	Grant et al., 1997 (neotectonic rate, N branch)	.0025-.006		0.011	0	0.0438	0.397	0.436	0.479	1.2	0.295
F0443	R	N Newport-Inglewood dextral f, CA [F0825R]	S	combined offset rate (5 GCN data)					0.407	0.443	0.457	0.463	0.552	0.0377
F1439	R	Navarro dextral(?) fault, offshore CA	S	combined offset rate (0 GCN data)					0.0381	0.00713	6.18	11.6	42.8	12.6
F1628	N	nor. f. btw. Black Hills & N. Palo Verde Mts., CA	C	Christiansen and Yeats, 1992			13	8	4.3E-6	7.65E-7	0.000118	0.00017	0.00063	0.00017
F1628	N	nor. f. btw. Black Hills & N. Palo Verde Mts., CA	S	combined offset rate (1 GCN data)					5.11E-6	5.1E-7	0.000149	0.0364	0.399	0.157
F0693	N	normal fault E of Cottonwood Mountains, CA	C	Stewart, 1978	2-5		13-11		0.128	0.289	0.292	0.293	0.465	0.0857
F0693	N	normal fault E of Cottonwood Mountains, CA	S	combined offset rate (1 GCN data)					0.000638	0.00198	0.268	0.273	0.731	0.245
F1629	N	normal fault W of Colorado River, 33N, CA	C	Christiansen and Yeats, 1992			13	8	4.3E-6	7.65E-7	0.000118	0.00017	0.00063	0.00017
F1629	N	normal fault W of Colorado River, 33N, CA	S	combined offset rate (1 GCN data)					5.11E-6	5.1E-7	0.000149	0.0364	0.399	0.157
F0691	N	normal fault, 36-37N, 117W, CA	C	Stewart, 1978	2-5		13-11		0.128	0.289	0.292	0.293	0.465	0.0857
F0691	N	normal fault, 36-37N, 117W, CA	S	combined offset rate (1 GCN data)					0.000638	0.00198	0.268	0.273	0.731	0.245
F2277	N	normal fault, 36N, 116W, CA-NV	S	combined offset rate (0 GCN data)					0.000304	0.00102	0.183	0.25	1.09	0.343
F0690	N	normal fault, 37-36N, 117W, CA	C	Stewart, 1978	2-5		13-11		0.128	0.289	0.292	0.293	0.465	0.0857
F0690	N	normal fault, 37-36N, 117W, CA	S	combined offset rate (1 GCN data)					0.000638	0.00198	0.268	0.273	0.731	0.245
F2262	N	normal fault, 37N, 117W, CA-NV	S	combined offset rate (0 GCN data)					0.000304	0.00102	0.183	0.25	1.09	0.343
F2052	N	normal fault, 39N, 120W, CA	S	combined offset rate (0 GCN data)					0.000304	0.00102	0.183	0.25	1.09	0.343
F0521	N	normal faults of Mono Basin, NV-CA	C	Loring, 1976			16.6	1.6	0.0000215	5.54E-6	0.000588	0.000848	0.00313	0.000846
F0521	N	normal faults of Mono Basin, NV-CA	S	combined offset rate (1 GCN data)					0.000025	4.44E-6	0.000725	0.037	0.399	0.157
F2066	P	North Channel Slope thrust plate, off CA	S	combined offset rate (0 GCN data)					2.48	4.88	4.72	4.59	7.49	1.4
F1462	L	North Channel-Pitas Point-Ventura sin. f. s., CA	S	combined offset rate (0 GCN data)					0.00356	0.00356	2.23	4.33	15.4	4.56
F1462	T	North Channel-Pitas Point-Ventura thrust, CA	A	Yerkes et al., 1987 (fold amplitude; exceeds faul	3.0		0.20	0	9.32	14.7	17.4	20.7	53	14.1
F1462	T	North Channel-Pitas Point-Ventura thrust, CA	S	combined offset rate (1 GCN data)					0.355	2.29E-6	17.1	19.9	52.1	14.4
F0937	T	North Frontal thrust fault zone, CA	C	Clark et al., 1984 (neotectonic rate)	0.07		1.-0.5	0	0.0389	0.0642	0.0802	0.084	0.146	0.0292
F0937	T	North Frontal thrust fault zone, CA	S	combined offset rate (1 GCN data)					0.0247	0.0641	0.0826	0.151	1.2	0.31
F2390	N	North Peavine Mountain normal fault, CA-NV	S	combined offset rate (0 GCN data)					0.000304	0.00102	0.183	0.25	1.09	0.343
F0687	N	North Tahoe-Tahoe normal fault, CA	S	combined offset rate (0 GCN data)					0.000304	0.00102	0.183	0.25	1.09	0.343
F0824	R	northern Palos Verdes dextral f, CA [see F0378T]	A	Stephanson et al., 1995 (neotectonic rate)	0.3		0.12-0.08	0	1.91	2.89	3	3.05	4.44	0.648
F0824	R	northern Palos Verdes dextral f, CA [see F0378T]	A	McNeilan et al., 1996 (neotectonic rate)	0.021-0.024		.008-.0078	0	1.69	2.78	2.77	2.76	3.8	0.507
F0824	R	northern Palos Verdes dextral f, CA [see F0378T]	S	combined offset rate (2 GCN data)					2.13	2.81	2.82	2.85	3.66	0.757
F1947	T	Northridge Hills blind thrust-Verdugo thrust, CA	A	Baldwin et al., 2000	0.005-0.007		0.030-0.006	0	0.151	0.235	0.332	0.4	0.962	0.217
F1947	T	Northridge Hills blind thrust-Verdugo thrust, CA	B	SCEC Working Group C, 2001 (continuity; dip to N)	>1		13-5.3	0	0.0501	0.134	0.594	0.89	3.26	0.883
F1947	T	Northridge Hills blind thrust-Verdugo thrust, CA	S	combined offset rate (2 GCN data)					0.136	0.226	0.298	0.375	0.984	0.269
F1441	P	Oak Ridge thrust, CA [S dip; c.f. F0816T, F1948T]	A	Sarna-Wojcicki et al., 1987 (throw 0.055 km)	~0.118		0.050	0	2.15	2.55	3.22	5.98	28.1	12.2
F1441	P	Oak Ridge thrust, CA [S dip; c.f. F0816T, F1948T]	A	Yeats, 1993b (revised neotec. rate, using new dat	2.4		0.5	0	4.03	4.77	4.88	4.94	6.22	0.565
F1441	P	Oak Ridge thrust, CA [S dip; c.f. F0816T, F1948T]	A	Huftile and Yeats, 1996	1.3-1.6		0.5		2.33	2.88	2.95	2.99	3.86	0.394
F1441	P	Oak Ridge thrust, CA [S dip; c.f. F0816T, F1948T]	S	combined offset rate (3 GCN data)					2.92	4.05	4.12	4.13	5.03	0.688
F2067	R	Ortigalita dextral fault, CA	C	Hart et al., 1986	<5?		<1.8?	0	0.138	1.45	2.77	6.91	45.3	16.5
F2067	R	Ortigalita dextral fault, CA	S	combined offset rate (1 GCN data)					0.118	2.29E-6	2.91	7.59	44.1	16.1
F2068	R	Owens Valley dextral fault, CA [c.f. F0382N]	S	combined offset rate (0 GCN data)					0.0381	0.00713	6.18	11.6	42.8	12.6
F2069	L	Owl Lake sinistral fault, CA	S	combined offset rate (0 GCN data)					0.00356	0.00356	2.23	4.33	15.4	4.56
F1850	R	Pahrump dextral(?) fault, NV-CA	S	combined offset rate (0 GCN data)					0.0381	0.00713	6.18	11.6	42.8	12.6
F0378	T	Palos Verdes thrust, CA [see also F0824R]	B	Yerkes et al., 1965	0.55-0.70		1.8-1.2	0	0.32	0.392	0.417	0.423	0.554	0.0621
F0378	T	Palos Verdes thrust, CA [see also F0824R]	C	Petersen and Wesnousky, 1994 (neotectonic rate)	0.003		.03-.13	0	0.0118	0.0287	0.0377	0.0447	0.113	0.0262
F0378	T	Palos Verdes thrust, CA [see also F0824R]	B	Ward and Valensise, 1994	1.05		2.1-1.2	0	0.501	0.527	0.636	0.654	0.872	0.109
F0378	T	Palos Verdes thrust, CA [see also F0824R]	S	combined offset rate (3 GCN data)					0.314	0.507	0.51	0.501	0.583	0.0736
F2003	R	Palos Verdes-Coronado Bank dextral f, off CA-B.C.	S	combined offset rate (0 GCN data)					0.0381	0.00713	6.18	11.6	42.8	12.6
F0692	N	Panamint Valley normal fault [see F0819R], CA	C	Stewart, 1978	2-5		13-11		0.128	0.289	0.292	0.293	0.465	0.0857
F0692	N	Panamint Valley normal fault [see F0819R], CA	S	combined offset rate (1 GCN data)					0.000638	0.00198	0.268	0.273	0.731	0.245
F1938	T	Pecho-Wilmar Ave.-Oceano thrust fault zone, CA	A	Nitchman and Slemmons, 1994 (initiation and throw	0.25-0.30		<3.8		0.0724	0.0799	0.145	0.583	2.86	4.02
F1938	T	Pecho-Wilmar Ave.-Oceano thrust fault zone, CA	A	Nitchman and Slemmons, 1994 (neotectonic rate)	0.007		0.124	0	0.057	0.0855	0.0898	0.13	0.309	1.08
F1938	T	Pecho-Wilmar Ave.-Oceano thrust fault zone, CA	B	Lettis et al., 1994 (neotectonic rate)	.0043-.0064		0.120	0	0.00346	0.0855	0.0678	0.107	0.302	1.1
F1938	T	Pecho-Wilmar Ave.-Oceano thrust fault zone, CA	S	combined offset rate (3 GCN data)					0.0661	0.08	0.0886	0.0925	0.113	0.275
F1948	T	Pico blind thrust, CA [c.f. F1441P]	B	Davis and Namson, 1994	2.3		2.3-2.0	0	0.983	1.05	1.16	1.24	1.98	0.304
F1948	T	Pico blind thrust, CA [c.f. F1441P]	B	Huftile and Yeats, 1996	2.83		2.3		1.18	1.23	1.23	1.23	1.29	0.0269
F1948	T	Pico blind thrust, CA [c.f. F1441P]	S	combined offset rate (2 GCN data)					1.05	1.23	1.23	1.22	1.31	0.13
F1981	L	Pinto Mountain sinistral fault, CA	A	Dibblee, 1968a	9.6		~1.8?		5.05	5.32	5.33	5.34	5.65	0.151
F1981	L	Pinto Mountain sinistral fault, CA	A	Dibblee, 1975	16		<66.4		0.246	0.256	0.482	1.65	9.26	7.23
F1981	L	Pinto Mountain sinistral fault, CA	S	combined offset rate (2 GCN data)					1.45	5.33	5.32	5.24	5.66	1.36
F0922	R	Pisgah-Bullion-Mesquite Lake dextral fault, CA	B	Dokka and Travis, 1990a [revised initiation]	6.4-14.4		10-6	0	0.429	0.911	1.07	1.13	2.14	0.447
F0922	R	Pisgah-Bullion-Mesquite Lake dextral fault, CA	S	combined offset rate (1 GCN data)					0.242	0.927	1.23	4.57	34.5	8.72
F0364	L	Point Dume-Santa Monica s f, CA (c.f. F0770T)	A	Lamar, 1961	8		11	2?	0.0000366	0.0000237	0.00102	0.00155	0.00611	0.00173
F0364	L	Point Dume-Santa Monica s f, CA (c.f. F0770T)	C	Christiansen and Yeats, 1992	60-90		16.6	11.2	6.52E-6	3.02E-7	0.000179	0.000257	0.000949	0.000256
F0364	L	Point Dume-Santa Monica s f, CA (c.f. F0770T)	A	Tsutsumi et al., 2001 (now purely dip-slip)			>17	7	0.0000104	6.47E-7	0.000286	0.000414	0.00153	0.000415
F0364	L	Point Dume-Santa Monica s f, CA (c.f. F0770T)	S	combined offset rate (3 GCN data)					4.34E-6	2.86E-7	0.000112	0.00134	0.000727	0.103
F1437	T	Point Reyes thrust fault, offshore CA	C	McCulloch, 1987	>1.4		5.3	0	0.284	0.364	0.928	1.07	2.78	0.696
F1437	T	Point Reyes thrust fault, offshore CA	S	combined offset rate (1 GCN data)					0.0161	4.46E-8	0.759	0.925	2.7	0.734
F2347	T	Puente Hills blind thrust fault, CA	A	Shaw and Shearer, 1989 (neotectonic rate)	0.338		<1.6	0	0.216	0.225	0.422	1.48	8.16	6.78
F2347	T	Puente Hills blind thrust fault, CA	A	Dolan et al., 2003 (neotectonic rate)	0.0061	0.0005	0.011	0	0.369	0.56	0.559	0.558	0.739	0.0912
F2347	T	Puente Hills blind thrust fault, CA	S	combined offset rate (2 GCN data)					0.275	0.543	0.532	0.565	0.734	1.39
F2070	R	Quien Sabe dextral fault, CA	S	combined offset rate (0 GCN data)					0.0381	0.00713	6.18	11.6	42.8	12.6
F1945	L	Raymond sinistral fault, CA (see T below)	A	Marin et al., 2000 (neotectonic rate)	0.044		<0.0256	0	1.69	1.9	3.41	8.46	53.1	17.9
F1945	L	Raymond sinistral fault, CA (see T below)	S	combined offset rate (1 GCN data)					1.57	1.9	3.39	8.28	51.4	17.6
F1945	T	Raymond thrust, CA (see L above)	B	Yerkes et al., 1965	1.2		11.2-5.3		0.106	0.116	0.145	0.152	0.222	0.0338
F1945	T	Raymond thrust, CA (see L above)	A	Marin et al., 2000 (neotectonic rate)	0.0005		0.012-0.009	0	0.00575	0.0595	0.0643	0.0758	0.22	0.0547
F1945	T	Raymond thrust, CA (see L above)	S	combined offset rate (2 GCN data)					0.0156	0.113	0.119	0.122	0.215	0.108
F0816	T	Red Mountain thrust system, CA [N dip; c.f. F1441	A	Sarna-Wojcicki et al., 1979 (abstract)	6.5		0.5	0	11	12.9	13.2	13.4	16.8	1.51
F0816	T	Red Mountain thrust system, CA [N dip; c.f. F1441	C	Petersen and Wesnousky, 1994 (neotectonic rate)	0.085-1.48		0.2-0.3	0	0.382	2.86	3.25	3.53	8.44	2.13
F0816	T	Red Mountain thrust system, CA [N dip; c.f. F1441	C	Petersen and Wesnousky, 1994 (neotectonic rate)	.052-.103		0.045-0.06	0	0.806	1.43	1.46	1.47	2.2	0.356
F0816	T	Red Mountain thrust system, CA [N dip; c.f. F1441	S	combined offset rate (3 GCN data)					1.05	12.1	12	10	15.3	4.79
F2071	N	Robinson Creek normal fault, CA	S	combined offset rate (0 GCN data)					0.000304	0.00102	0.183	0.25	1.09	0.343
F0456	R	Rose Cyn-Old Town-Silver Strand dex. f, CA	A	Kennedy, 1975	4		3.9-1.8		0.906	1.2	1.4	1.47	2.33	0.383
F0456	R	Rose Cyn-Old Town-Silver Strand dex. f, CA	A	Lindvall and Rockwell, 1995 (trace; neotectonic r	>0.0087		<0.0081		1.54	2.48	13.9	27	U	35.7
F0456	R	Rose Cyn-Old Town-Silver Strand dex. f, CA	S	combined offset rate (2 GCN data)					0.987	1.37	1.59	2.67	10.3	8.86
F2344	N	Round Valley normal fault, CA	C	Stewart, 1978	2-5		13-11		0.128	0.289	0.292	0.293	0.465	0.0857
F2344	N	Round Valley normal fault, CA	S	combined offset rate (1 GCN data)					0.000638	0.00198	0.268	0.273	0.731	0.245
F0931	R	Round Vly-Bartlett Sprgs-Wilson dextral f, CA	S	combined offset rate (0 GCN data)					0.0381	0.00713	6.18	11.6	42.8	12.6
F0371	N	S Sangre de Cristo normal fault, NM [see F0460N,	B	Sutherland, 1963			<23.7	>5.3	2.69E-6	3.06E-7	0.0000817	0.000135	0.000576	0.000158
F0825	R	S. Newport-Inglewood f, CA [F0443R, F0456R]	S	combined offset rate (0 GCN data)					0.0381	0.00713	6.18	11.6	42.8	12.6
F0396	R	San Andreas d. f., train A (offshore), CA	A	Prentice et al., 1999 (neotectonic rate, onshore	0.18		<0.0132	0	13.9	14.5	25.7	40.8	U	38
F0396	R	San Andreas d. f., train A (offshore), CA	S	combined offset rate (1 GCN data)					10.2	14.6	25.1	39.6	U	37.7
F0397	R	San Andreas d. f., train B (N coast), CA	B	Graham, 1979	305		16.6	0	18.3	18.4	18.4	18.4	18.5	0.0629
F0397	R	San Andreas d. f., train B (N coast), CA	A	Mattinson and James, 1985	900-1400		80		10.1	14.3	14.4	14.4	19.1	2.28
F0397	R	San Andreas d. f., train B (N coast), CA	A	Prentice, 1989	<0.050		0.00208	0	0.958	10.8	12.6	12.8	26.1	7.27
F0397	R	San Andreas d. f., train B (N coast), CA	A	Niemi and Hall, 1992	0.039-0.046		0.0017-.0018	0	18.9	24.4	24.3	24.3	29.5	2.62
F0397	R	San Andreas d. f., train B (N coast), CA	C	Stewart and Crowell, 1992 (total slip)	330		<22	0	15.3	15.8	28.1	43.7	U	38.9
F0397	R	San Andreas d. f., train B (N coast), CA	C	Stewart and Crowell, 1992 (partial slip)	240		11.2-5.3	0	21.6	22.4	29.1	30.4	44.1	6.67
F0397	R	San Andreas d. f., train B (N coast), CA	S	combined offset rate (6 GCN data)					18.2	18.4	18.4	19.7	25.6	2.38
F0398	R	San Andreas d. f., train C (Peninsula), CA	A	Cummings, 1968	28		3.0-1.0		8.1	10.7	14	17.4	47.5	13.1
F0398	R	San Andreas d. f., train C (Peninsula), CA	A	Addicott, 1969	32-40		5.3-1.8		6.57	7.6	10.1	11.1	19.4	3.64
F0398	R	San Andreas d. f., train C (Peninsula), CA	B	Graham, 1979	305		16.6	0	18.3	18.4	18.4	18.4	18.5	0.0629
F0398	R	San Andreas d. f., train C (Peninsula), CA	A	Cummings, 1983	3		0.45	0	4.52	6.71	6.72	6.73	8.98	1.14
F0398	R	San Andreas d. f., train C (Peninsula), CA	A	Mattinson and James, 1985	900-1400		80		10.1	14.3	14.4	14.4	19.1	2.28
F0398	R	San Andreas d. f., train C (Peninsula), CA	A	Sarna-Wojcicki et al., 1986	225		6	0	32.2	37	37.5	37.8	44.8	3.21
F0398	R	San Andreas d. f., train C (Peninsula), CA	A	Graham et al., 1989	315-320		23	0	13.2	13.8	13.8	13.8	14.4	0.309
F0398	R	San Andreas d. f., train C (Peninsula), CA	A	Ward and Page, 1989 (revising Hall, 1984 age)	>0.015		0.002	0	6.73	13.3	20.8	25.3	69.1	17.3
F0398	R	San Andreas d. f., train C (Peninsula), CA	C	Brown, 1990 (neotectonic rate)	>11		2-0.4	0	6.45	11.3	22.9	31.1	106	26.4
F0398	R	San Andreas d. f., train C (Peninsula), CA	A	Dieterich et al., 1990 (revising Hall, 1984 age)	0.024		.0028~.0018	0	6.53	9.7	10.5	10.6	15.1	2.17
F0398	R	San Andreas d. f., train C (Peninsula), CA	C	Stewart and Crowell, 1992 (total slip)	330		<22	0	15.3	15.8	28.1	43.7	U	38.9
F0398	R	San Andreas d. f., train C (Peninsula), CA	C	Stewart and Crowell, 1992 (partial slip)	240		11.2-5.3	0	21.6	22.4	29.1	30.4	44.1	6.67
F0398	R	San Andreas d. f., train C (Peninsula), CA	A	Hall et al., 1999 (neotectonic rate)	0.028-0.032		.00219-.00195	0	10.3	14.6	14.6	14.5	18.5	1.98
F0398	R	San Andreas d. f., train C (Peninsula), CA	S	combined offset rate (13 GCN data)					9.88	13.8	13.8	13.6	14.5	0.916
F0399	R	San Andreas d. f., train D (creeping), CA	B	Dickinson et al., 1972	160-200		3.4-5	0	31.2	41.4	42.6	42.8	55.4	6.43
F0399	R	San Andreas d. f., train D (creeping), CA	C	Crowell, 1975	300		12	0	16.7	24.9	25	25	33.6	4.3
F0399	R	San Andreas d. f., train D (creeping), CA	B	Graham, 1979	305		16.6	0	18.3	18.4	18.4	18.4	18.5	0.0629
F0399	R	San Andreas d. f., train D (creeping), CA	C	Bohannon and Howell, 1982	305		16.6-11.2	0	18.5	18.6	21.9	22.2	26.9	2.53
F0399	R	San Andreas d. f., train D (creeping), CA	C	Clark et al., 1984	0.062-0.066		<0.0021	0	30.4	33.3	53.8	70.7	U	44.1
F0399	R	San Andreas d. f., train D (creeping), CA	C	Clark et al., 1984	0.127		0.0038	0	31.4	33.8	33.8	33.8	36.3	1.19
F0399	R	San Andreas d. f., train D (creeping), CA	A	Mattinson and James, 1985	900-1400		80	0	10.1	14.3	14.4	14.4	19.1	2.28
F0399	R	San Andreas d. f., train D (creeping), CA	A	Hay et al., 1989 (neotectonic rate)	0.0028		0.000081	0	18.3	42.9	55.1	64.9	U	33.7
F0399	R	San Andreas d. f., train D (creeping), CA	A	Graham et al., 1989	315-320		23	0	13.2	13.8	13.8	13.8	14.4	0.309
F0399	R	San Andreas d. f., train D (creeping), CA	A	Perkins et al., 1989 (neotectonic rate)	0.014-0.018		0.0008	0	10.9	22	22.5	23	37.4	6.68
F0399	R	San Andreas d. f., train D (creeping), CA	C	Stewart and Crowell, 1992 (total slip)	330		<22	0	15.3	15.8	28.1	43.7	U	38.9
F0399	R	San Andreas d. f., train D (creeping), CA	C	Stewart and Crowell, 1992 (partial slip)	240		11.2-5.3	0	21.6	22.4	29.1	30.4	44.1	6.67
F0399	R	San Andreas d. f., train D (creeping), CA	S	combined offset rate (12 GCN data)					18.4	33.5	33.4	32.8	35.5	3.03
F0400	R	San Andreas d. f., train E (Carrizo), CA	B	Dickinson et al., 1972	160-200		3.4-5	0	31.2	41.4	42.6	42.8	55.4	6.43
F0400	R	San Andreas d. f., train E (Carrizo), CA	C	Crowell, 1975	300		12	0	16.7	24.9	25	25	33.6	4.3
F0400	R	San Andreas d. f., train E (Carrizo), CA	B	Graham, 1979	305		16.6	0	18.3	18.4	18.4	18.4	18.5	0.0629
F0400	R	San Andreas d. f., train E (Carrizo), CA	C	Bohannon and Howell, 1982	305		16.6-11.2	0	18.5	18.6	21.9	22.2	26.9	2.53
F0400	R	San Andreas d. f., train E (Carrizo), CA	A	Sieh and Jahns, 1984 (neotectonic rate)	0.475		0.0133	0	35.1	35.8	35.8	35.8	36.6	0.355
F0400	R	San Andreas d. f., train E (Carrizo), CA	A	Sieh and Jahns, 1984 (neotectonic rate)	0.128		.0038-.0035	0	32.3	35	35.1	35.1	37.9	1.43
F0400	R	San Andreas d. f., train E (Carrizo), CA	C	Clark et al., 1984	0.062-0.066		<0.0021	0	30.4	33.3	53.8	70.7	U	44.1
F0400	R	San Andreas d. f., train E (Carrizo), CA	C	Clark et al., 1984	0.127		0.0038	0	31.4	33.8	33.8	33.8	36.3	1.19
F0400	R	San Andreas d. f., train E (Carrizo), CA	A	Mattinson and James, 1985	900-1400		80	0	10.1	14.3	14.4	14.4	19.1	2.28
F0400	R	San Andreas d. f., train E (Carrizo), CA	A	Graham et al., 1989	315-320		23	0	13.2	13.8	13.8	13.8	14.4	0.309
F0400	R	San Andreas d. f., train E (Carrizo), CA	C	Stewart and Crowell, 1992 (total slip)	330		<22	0	15.3	15.8	28.1	43.7	U	38.9
F0400	R	San Andreas d. f., train E (Carrizo), CA	C	Stewart and Crowell, 1992 (partial slip)	240		11.2-5.3	0	21.6	22.4	29.1	30.4	44.1	6.67
F0400	R	San Andreas d. f., train E (Carrizo), CA	S	combined offset rate (12 GCN data)					34.7	35.7	35.6	35.6	36.3	0.384
F0401	R	San Andreas d. f., train F (San Gabriel), CA	C	Crowell, 1975	240		12	0	18.3	19.9	20	20	22	0.936
F0401	R	San Andreas d. f., train F (San Gabriel), CA	B	Graham, 1979	305		16.6	0	18.3	18.4	18.4	18.4	18.5	0.0629
F0401	R	San Andreas d. f., train F (San Gabriel), CA	C	Bohannon and Howell, 1982	305		16.6-11.2	0	18.5	18.6	21.9	22.2	26.9	2.53
F0401	R	San Andreas d. f., train F (San Gabriel), CA	A	Rust, 1982 (neotectonic rate)	.041-.047		.00078-.00115	0	34.4	42.7	45.6	46.2	59.7	6.72
F0401	R	San Andreas d. f., train F (San Gabriel), CA	A	Barrows et al., 1985 (Qh)	~16		1.2~0.5	0	13.1	14.6	18.8	20.1	32.5	5.46
F0401	R	San Andreas d. f., train F (San Gabriel), CA	A	Barrows et al., 1985 (Qhs)	14~16		1.2~0.5	0	12.2	13.8	17.6	18.9	30.6	5.16
F0401	R	San Andreas d. f., train F (San Gabriel), CA	A	Barrows et al., 1985 (Qn)	~9		0.6~0.3	0	13.9	17.1	20	21.1	34.1	5.42
F0401	R	San Andreas d. f., train F (San Gabriel), CA	A	Barrows et al., 1985 (Qbl)	~8		0.6~0.3	0	12.3	15.2	17.8	18.8	30.4	4.85
F0401	R	San Andreas d. f., train F (San Gabriel), CA	A	Barrows et al., 1985 (Qs)	~8		0.6~0.3	0	12.3	15.2	17.8	18.8	30.4	4.85
F0401	R	San Andreas d. f., train F (San Gabriel), CA	A	Barrows et al., 1985 (Qbb)	3~5		0.3~0.1	0	10.1	15.6	19.9	24.6	68.1	17.2
F0401	R	San Andreas d. f., train F (San Gabriel), CA	A	Barrows et al., 1985 (Qbp)	2~4		0.3~0.1	0	6.76	11.8	15	18.6	52.7	14.4
F0401	R	San Andreas d. f., train F (San Gabriel), CA	A	Frizzell et al., 1986 [Liebre Mt. tie]	150-170		215	0	0.683	0.744	0.744	0.744	0.805	0.031
F0401	R	San Andreas d. f., train F (San Gabriel), CA	A	Meisling and Weldon, 1986 [Liebre Mt. allochthano	150-170		11.2-3.4	0	14.3	15.4	21.9	24.5	44.6	8.69
F0401	R	San Andreas d. f., train F (San Gabriel), CA	A	Scwartz and Weldon, 1986	0.019		<0.0012	0	13.3	18.2	29.6	45.1	U	39.6
F0401	R	San Andreas d. f., train F (San Gabriel), CA	A	Scwartz and Weldon, 1986	<0.130		0.00329	0	1.34	10.2	20.2	20.3	39.7	11.5
F0401	R	San Andreas d. f., train F (San Gabriel), CA	A	Salyards et al., 1992	0.0167-.0245		0.00058	0	22.7	39.8	41	42.6	72.6	13.4
F0401	R	San Andreas d. f., train F (San Gabriel), CA	C	Stewart and Crowell, 1992 (total slip)	270		11.2-5.5	0	24.3	25.1	32.3	33.7	47.9	7.01
F0401	R	San Andreas d. f., train F (San Gabriel), CA	C	Stewart and Crowell, 1992 (partial slip)	160		5.5	0	27.2	29.1	29.1	29.1	31	0.946
F0401	R	San Andreas d. f., train F (San Gabriel), CA	A	Weldon et al., 2004 (neotectonic rate)	0.046		0.0015	0	25.6	31.5	31.6	31.6	37.7	2.93
F0401	R	San Andreas d. f., train F (San Gabriel), CA	A	Matmon et al., 2005 (neotectonic rate, fan #0)	0.68	0.25	.021~.0104	0	12.6	40	43.4	45.2	88	19.1
F0401	R	San Andreas d. f., train F (San Gabriel), CA	A	Matmon et al., 2005 (neotectonic rate, fan #1)	1.75	0.25	.0369~.0221	0	39.4	55.6	59.3	60.6	87.7	12.6
F0401	R	San Andreas d. f., train F (San Gabriel), CA	A	Matmon et al., 2005 (neotectonic rate, fan #3)	7.40	0.55	<0.4694	0	15.5	17.6	29.5	45.2	U	39.4
F0401	R	San Andreas d. f., train F (San Gabriel), CA	A	Matmon et al., 2005 (neotectonic rate, fan #4)	9.60	0.55	.4624~.1004	0	20.6	22.8	34.1	40.5	87.9	18.7
F0401	R	San Andreas d. f., train F (San Gabriel), CA	A	Matmon et al., 2005 (neotectonic rate, fan #5)	16.50	0.55	.5978~.2278	0	27.7	29.4	40	43	69.8	12.3
F0401	R	San Andreas d. f., train F (San Gabriel), CA	S	combined offset rate (24 GCN data)					25.2	27.1	28.5	28.2	30.4	1.81
F0402	R	San Andreas d. f., train G (Salton), CA	C	Crowell, 1975	240		12	0	18.3	19.9	20	20	22	0.936
F0402	R	San Andreas d. f., train G (Salton), CA	A	Ehlert and Ehlig, 1977	210-240		10-6	0	12.4	20.7	23.9	24.4	38.7	7.23
F0402	R	San Andreas d. f., train G (Salton), CA	B	Crowell and Sylvester, 1979	215		<10	0	13	19.8	35.5	51.7	U	43.2
F0402	R	San Andreas d. f., train G (Salton), CA	B	Crowell and Sylvester, 1979	12.9-24		<1.2	0	12.4	18.7	28.8	44.1	U	39.4
F0402	R	San Andreas d. f., train G (Salton), CA	B	Graham, 1979	305		16.6	0	18.3	18.4	18.4	18.4	18.5	0.0629
F0402	R	San Andreas d. f., train G (Salton), CA	A	Morton, 1980 (neotectonic rate)	<25		1.0-0.7	0	0.578	0.0588	11.6	12.4	29.7	8.05
F0402	R	San Andreas d. f., train G (Salton), CA	A	Weldon and Sieh, 1981	0.250		>0.0085	0	4.65	10.1	14.7	15.4	28.4	6.83
F0402	R	San Andreas d. f., train G (Salton), CA	A	Buesch and Ehlig, 1982	240		22.5	0	10.2	10.7	10.7	10.7	11.1	0.223
F0402	R	San Andreas d. f., train G (Salton), CA	A	Keller et al., 1982b (neotectonic rate, S branch)	0.700		0.07-0.02	0	9.42	11.4	15.6	18	38.7	8.18
F0402	R	San Andreas d. f., train G (Salton), CA	A	Rasmussen, 1982 (neotectonic rate)	0.75		>0.03	0	3.96	8.64	12.5	13.4	27	6.34
F0402	R	San Andreas d. f., train G (Salton), CA	C	Engel and Schultejann, 1984	300		10-5.3	0	15.2	27.3	33.1	34.6	61.3	12.4
F0402	R	San Andreas d. f., train G (Salton), CA	A	Weldon and Sieh, 1985 (neotectonic rate)	0.3-0.4		0.0144	0	19.8	24.4	24.4	24.4	29	2.34
F0402	R	San Andreas d. f., train G (Salton), CA	A	Prentice et al., 1986 (neotectonic rate)	1.3-1.4		0.10-0.05	0	7.62	12.3	15.5	16.2	27.6	5.51
F0402	R	San Andreas d. f., train G (Salton), CA	A	Harden and Matti, 1989	0.66-1.02		0.030	0	21.3	30.7	40.3	53.4	U	36.8
F0402	R	San Andreas d. f., train G (Salton), CA	C	Stewart and Crowell, 1992 (total slip)	270		11.2-5.5	0	24.3	25.1	32.3	33.7	47.9	7.01
F0402	R	San Andreas d. f., train G (Salton), CA	C	Stewart and Crowell, 1992 (partial slip)	160		5.5	0	27.2	29.1	29.1	29.1	31	0.946
F0402	R	San Andreas d. f., train G (Salton), CA	C	Petersen and Wesnousky, 1994 (neotectonic rate)	~0.7		0.02-0.07	0	9.42	11.4	15.6	18	38.7	8.18
F0402	R	San Andreas d. f., train G (Salton), CA	S	combined offset rate (17 GCN data)					18.3	18.4	18.4	19.2	26.7	1.93
F0402	T	San Andreas thrust, train G (Salton), CA	S	combined offset rate (0 GCN data)					0.000958	0.000519	0.228	0.544	2.41	0.691
F1946	T	San Cayetano thrust fault, CA	A	Rockwell, 1988 (from dip-slip rates)	3.7		<1		2.27	3.4	6.64	14.6	88.9	24.5
F1946	T	San Cayetano thrust fault, CA	S	combined offset rate (1 GCN data)					0.355	2.29E-6	6.32	14	86.6	24.1
F2005	R	San Diego Basin dextral fault, off CA	S	combined offset rate (0 GCN data)					0.0381	0.00713	6.18	11.6	42.8	12.6
F0447	R	San Gabriel-Vasquez Creek dextral fault, CA	B	Bohannon, 1975	60		~20	~14	5.22E-6	2.74E-7	0.000143	0.000206	0.000761	0.000206
F0447	R	San Gabriel-Vasquez Creek dextral fault, CA	C	Crowell, 1975	60		12-5.3	1.6	0.0000457	2.35E-6	0.00125	0.0018	0.00666	0.0018
F0447	R	San Gabriel-Vasquez Creek dextral fault, CA	C	Christiansen and Yeats, 1992	60		<16.6	5-4	0.0000162	1.55E-6	0.000447	0.000652	0.00244	0.000661
F0447	R	San Gabriel-Vasquez Creek dextral fault, CA	C	Stewart and Crowell, 1992	60		11	5	0.0000146	1.06E-6	0.000401	0.000583	0.00217	0.000587
F0447	R	San Gabriel-Vasquez Creek dextral fault, CA	A	Yeats et al., 1994 (neotectonic rate)	2-5		2	0	0.712	1.57	1.75	1.89	3.89	0.875
F0447	R	San Gabriel-Vasquez Creek dextral fault, CA	C	Ingersoll and Rumelhart, 1999	60		12	5	0.0000146	1.06E-6	0.000401	0.000583	0.00217	0.000587
F0447	R	San Gabriel-Vasquez Creek dextral fault, CA	B	SCEC Working Group C, 2001 (neotectonic rate is R	0.5		~0.5	0	0.763	0.994	1.02	1.03	1.37	0.155
F0447	R	San Gabriel-Vasquez Creek dextral fault, CA	S	combined offset rate (2* GCN data)					0.0000426	5.71E-7	0.911	1.3	10.5	4.08
F0538	R	San Gregorio-Hosgri dex. f., CA [see F1940R]	A	Hamilton and Willingham, 1977	10-20		5		1.65	2.94	3	3.03	4.58	0.745
F0538	R	San Gregorio-Hosgri dex. f., CA [see F1940R]	A	Graham and Dickinson, 1978	115		16		6.77	7.17	7.19	7.19	7.66	0.227
F0538	R	San Gregorio-Hosgri dex. f., CA [see F1940R]	A	Hall, 1978	80-95		5		14.1	17.2	17.5	17.7	22.3	2.08
F0538	R	San Gregorio-Hosgri dex. f., CA [see F1940R]	A	Weber and Cotton, 1981 (neotectonic rate)	0.73-1.16		0.105	0	7.14	9.97	11	14	40.9	13.1
F0538	R	San Gregorio-Hosgri dex. f., CA [see F1940R]	C	Hart et al., 1986	80-110		16.4-11.2		5.11	6.61	6.88	6.97	9.2	1.07
F0538	R	San Gregorio-Hosgri dex. f., CA [see F1940R]	C	Stewart and Crowell, 1992	70-115		23.7-5.3		3.34	4.66	6.38	7.53	16.8	3.64
F0538	R	San Gregorio-Hosgri dex. f., CA [see F1940R]	A	Hanson and Lettis, 1994 (neotectonic rate)	0.15-0.55		0.210	0	0.529	1.85	1.92	2.04	4.07	1.71
F0538	R	San Gregorio-Hosgri dex. f., CA [see F1940R]	A	Hall et al., 1994 (neotectonic rate)	.0102-.0133		.0092-.0099	0	0.402	1.24	1.24	1.24	2.12	0.408
F0538	R	San Gregorio-Hosgri dex. f., CA [see F1940R]	C	WGCEP, 2003 (N section of San Gregorio fault)	>0.3		.085-.08	0	3.72	7.23	17.3	19	46.5	11.9
F0538	R	San Gregorio-Hosgri dex. f., CA [see F1940R]	S	combined offset rate (9 GCN data)					2.63	7.16	7.17	6.94	7.64	1.1
F0538	T	San Gregorio-Hosgri thrust f, CA [see F1940RT]	C	Bird, unpubl., 2006: scarp/[Atwater & Stock 98 ag	0.7~1.4		7.8	0	0.076	0.135	0.135	0.135	0.193	0.0299
F0538	T	San Gregorio-Hosgri thrust f, CA [see F1940RT]	S	combined offset rate (1 GCN data)					0.0125	4.16E-8	0.138	0.287	1.84	0.467
F0544	R	San Jacinto-Coyote Creek dextral fault, CA	A	Sharp, 1967 (total slip)	24		<~110	0	0.22	0.237	0.436	1.52	8.41	6.89
F0544	R	San Jacinto-Coyote Creek dextral fault, CA	A	Bartholomew, 1970	16		0.9	0	15.7	17.7	17.8	17.8	20.2	1.14
F0544	R	San Jacinto-Coyote Creek dextral fault, CA	A	Sharp, 1981 (Anza section)	5.7-8.6		<0.73	0	8.97	11.5	18.8	32.1	U	34.6
F0544	R	San Jacinto-Coyote Creek dextral fault, CA	A	Sharp, 1981 (Borrego section)	0.011		.0045-.0065	0	0.625	1.97	2.02	2.05	3.61	0.71
F0544	R	San Jacinto-Coyote Creek dextral fault, CA	A	Morton et al., 1986	12		0.9-0.5	0	12.8	14.8	17.1	17.7	25.5	3.47
F0544	R	San Jacinto-Coyote Creek dextral fault, CA	A	Prentice et al., 1986	0.6-0.7		0.10-0.05	0	3.64	5.92	7.46	7.8	13.4	2.68
F0544	R	San Jacinto-Coyote Creek dextral fault, CA	A	Merifield et al., 1987	0.36-0.51		0.030	0	11.5	15.8	21.2	32	U	30.4
F0544	R	San Jacinto-Coyote Creek dextral fault, CA	A	Rockwell et al., 1990	0.088		<0.0095	0	9.4	9.9	17.8	30.9	U	34
F0544	R	San Jacinto-Coyote Creek dextral fault, CA	C	Stewart and Crowell, 1992 (total slip)	30		11.2-5.3?		2.17	3.2	3.64	3.8	6.18	1.05
F0544	R	San Jacinto-Coyote Creek dextral fault, CA	C	Petersen and Wesnousky, 1994 (neotectonic rate)	0.58-0.66		.044-.059	0	10.2	11.4	12	12.1	14.4	1.16
F0544	R	San Jacinto-Coyote Creek dextral fault, CA	A	Pollard and Rockwell, 1995 (Coyote Creek section)	0.0014		<0.0003	0	2.24	6.47	13	23.6	U	29.5
F0544	R	San Jacinto-Coyote Creek dextral fault, CA	S	combined offset rate (11 GCN data)					11.7	13	13.6	13.8	16.6	1.26
F1950	T	San Joaquin Hills blind thrust, CA	A	Grant et al., 1999	0.305		1.45-1.13	0	0.211	0.213	0.236	0.238	0.268	0.0172
F1950	T	San Joaquin Hills blind thrust, CA	S	combined offset rate (1 GCN data)					0.21	0.213	0.236	0.251	0.27	0.157
F2072	L	San Jose sinistral/reverse fault, CA	S	combined offset rate (0 GCN data)					0.00356	0.00356	2.23	4.33	15.4	4.56
F2073	R	San Juan dextral fault, CA	S	combined offset rate (0 GCN data)					0.0381	0.00713	6.18	11.6	42.8	12.6
F0770	T	Santa Cruz Is.-Santa Monica M-Hollywood th., CA	B	Yerkes et al., 1965	2		10.5		0.0972	0.19	0.19	0.19	0.284	0.0476
F0770	T	Santa Cruz Is.-Santa Monica M-Hollywood th., CA	A	McGill, 1981 (neotectonic rate)	0.047		0.125	0	0.373	0.387	0.439	0.605	1.41	2.07
F0770	T	Santa Cruz Is.-Santa Monica M-Hollywood th., CA	A	McGill, 1989 (neotectonic rate)	~0.055		~0.12	0	0.442	0.483	0.541	0.763	1.88	2.49
F0770	T	Santa Cruz Is.-Santa Monica M-Hollywood th., CA	A	Pinter and Sorlien, 1991 (neotectonic rate)	0.015		0.006-0.012	0	1.19	1.39	1.67	1.74	2.6	0.388
F0770	T	Santa Cruz Is.-Santa Monica M-Hollywood th., CA	C	Petersen and Wesnousky, 1994 (Santa Monica sec.)	.034-.047		.122-.126	0	0.257	0.327	0.327	0.327	0.397	0.0358
F0770	T	Santa Cruz Is.-Santa Monica M-Hollywood th., CA	C	Petersen and Wesnousky, 1994 (Hollywood section)	.002-.003		.004-.006	0	0.163	0.491	0.508	0.518	0.918	0.183
F0770	T	Santa Cruz Is.-Santa Monica M-Hollywood th., CA	A	Dolan and Pratt, 1997 (neotectonic rate)	>0.09		<1.2	0	0.113	0.144	0.816	2.93	18.8	10.4
F0770	T	Santa Cruz Is.-Santa Monica M-Hollywood th., CA	A	Dolan and Pratt, 1997 (neotectonic rate)	0.010		~0.05		0.044	0.257	0.296	0.67	2.75	3.78
F0770	T	Santa Cruz Is.-Santa Monica M-Hollywood th., CA	B	Tsutsumi et al., 2001 (neotectonic rate)	0.047-0.110		~0.12		0.363	0.712	0.807	1.07	2.77	2.99
F0770	T	Santa Cruz Is.-Santa Monica M-Hollywood th., CA	S	combined offset rate (9 GCN data)					0.398	0.431	0.431	0.432	0.471	0.0214
F2004	R	Santa Cruz-Santa Catalina Ridge dextral f, off CA	S	combined offset rate (0 GCN data)					0.0381	0.00713	6.18	11.6	42.8	12.6
F1436	R	Santa Lucia Bank dextral fault, offshore CA	S	combined offset rate (0 GCN data)					0.0381	0.00713	6.18	11.6	42.8	12.6
F2074	L	Santa Rosa Island sinistral/reverse fault, CA	S	combined offset rate (0 GCN data)					0.00356	0.00356	2.23	4.33	15.4	4.56
F0430	T	Santa Susana-San Fernando thrust, CA	A	Yeats, 1979	1.27-1.9		1.0-0.5	0	0.842	1.44	1.8	1.9	3.43	0.698
F0430	T	Santa Susana-San Fernando thrust, CA	C	Petersen and Wesnousky, 1994 (neotectonic rate)	>~4		0.5-2	0	1.66	2.64	3.81	4.44	10.3	2.34
F0430	T	Santa Susana-San Fernando thrust, CA	A	Huftile and Yeats, 1996	2.5-4.25		2.3-0.6	0	1.22	1.76	2.33	2.67	5.68	1.2
F0430	T	Santa Susana-San Fernando thrust, CA	S	combined offset rate (3 GCN data)					1.37	1.94	2.11	2.19	3.41	0.554
F0383	L	Santa Ynez River sinistral fault, CA	A	Dibblee, 1966	>3		10.5-5		0.5	1.08	3.37	5.27	19.5	5.29
F0383	L	Santa Ynez River sinistral fault, CA	S	combined offset rate (1 GCN data)					0.231	9.72E-7	3.12	5.02	18.5	5.12
F2075	R	Sargent dextral fault, CA	S	combined offset rate (0 GCN data)					0.0381	0.00713	6.18	11.6	42.8	12.6
F1530	D	Schwaub Peak low-angle normal fault, CA	A	Cemens and Wright, 1990	5		<14?		0.342	0.411	0.713	2.31	13.5	8.72
F1530	D	Schwaub Peak low-angle normal fault, CA	S	combined offset rate (1 GCN data)					0.0639	0.429	0.831	2.97	22.7	8.26
F0890	T	Sierra Madre-Cucamonga thrust system, CA	A	Morton et al., 1982 (neotectonic rate)	0.036		<0.013	0	2.8	3	5.47	12.4	75.2	21.9
F0890	T	Sierra Madre-Cucamonga thrust system, CA	C	Petersen and Wesnousky, 1994 (neotectonic rate)	0.244-~0.6		0.2-0.5	0	0.488	1.03	1.21	1.33	2.88	0.631
F0890	T	Sierra Madre-Cucamonga thrust system, CA	C	Petersen and Wesnousky, 1994 (neotectonic rate)	~0.004		.001-.011	0	0.266	0.428	0.668	1.05	3.76	1.87
F0890	T	Sierra Madre-Cucamonga thrust system, CA	A	Dolan et al., 1996 (neotectonic rate)	0.005		0.004-.002	0	0.904	1.47	1.67	1.8	3.42	0.673
F0890	T	Sierra Madre-Cucamonga thrust system, CA	A	Rubin et al., 1998 (neotectonic rate)	0.0044		0.018	0	0.141	0.251	0.248	0.245	0.342	0.0469
F0890	T	Sierra Madre-Cucamonga thrust system, CA	S	combined offset rate (5 GCN data)					0.232	0.285	0.389	1.08	3.16	1.07
F0382	N	Sierra Nevada Frontal normal f, CA [F2068R]	A	Christensen, 1966	1.2		1.8-1.0		0.654	0.722	0.902	1.24	3.27	2.88
F0382	N	Sierra Nevada Frontal normal f, CA [F2068R]	B	Bachman, 1974	1.2-3.4		2.3		0.379	0.999	1	1	1.63	0.318
F0382	N	Sierra Nevada Frontal normal f, CA [F2068R]	A	Clark, 1979 (neotectonic rate)	0.1		0.15-0.09	0	0.138	0.797	0.846	0.877	1.81	0.428
F0382	N	Sierra Nevada Frontal normal f, CA [F2068R]	A	Saint-Amand and Roquemore, 1979	0.9-1.6		3-2	0	0.279	0.455	0.5	0.532	0.974	0.187
F0382	N	Sierra Nevada Frontal normal f, CA [F2068R]	C	Clark et al., 1984 (neotectonic rate)	0.034-0.083		0.013-0.06	0	0.606	1.21	1.6	1.9	4.68	1.06
F0382	N	Sierra Nevada Frontal normal f, CA [F2068R]	B	Chase and Wallace, 1986	~2.7		10		0.136	0.198	0.266	0.493	1.64	2.61
F0382	N	Sierra Nevada Frontal normal f, CA [F2068R]	A	Huber, 1990 (footwall uplift only)	>2.15		10		0.151	0.25	0.442	0.947	4.06	3.83
F0382	N	Sierra Nevada Frontal normal f, CA [F2068R]	S	combined offset rate (7 GCN data)					0.627	0.697	0.724	0.742	0.95	0.0833
F2076	L	Simi-Santa Rosa sinistral fault, CA	S	combined offset rate (0 GCN data)					0.00356	0.00356	2.23	4.33	15.4	4.56
F2076	T	Simi-Santa Rosa thrust fault, CA	S	combined offset rate (0 GCN data)					0.000958	0.000519	0.228	0.544	2.41	0.691
F0659	N	Smith Valley-Sweetwater Flat n. f., NV-CA	C	Stewart, 1978	2-5		12.5-8		0.147	0.33	0.342	0.349	0.586	0.111
F0659	N	Smith Valley-Sweetwater Flat n. f., NV-CA	C	dePolo, 1998	0.0059		0.0115	0	0.194	0.521	0.525	0.519	0.802	0.143
F0659	N	Smith Valley-Sweetwater Flat n. f., NV-CA	C	Haller et al., 2002 (1291; Smith Valley fault)	0.0068		0.018	0	0.167	0.391	0.385	0.38	0.576	0.0949
F0659	N	Smith Valley-Sweetwater Flat n. f., NV-CA	S	combined offset rate (3 GCN data)					0.24	0.394	0.406	0.412	0.599	0.0924
F0923	R	South Lockhart-Helendale dextral fault, CA	B	Dokka and Travis, 1990a [revised initiation]	3		10-6	0	0.149	0.271	0.313	0.326	0.566	0.111
F0923	R	South Lockhart-Helendale dextral fault, CA	S	combined offset rate (1 GCN data)					0.135	0.271	0.377	4.03	34.5	8.93
F0832	R	southern Calaveras-Paicines dextral fault, CA	C	Hart et al., 1986 (neotectonic rate)	~0.143		0.013	0	10	11	11	11.1	12.1	0.53
F0832	R	southern Calaveras-Paicines dextral fault, CA	S	combined offset rate (1 GCN data)					0.7	11	11	11.1	23.9	4.81
F0826	R	southern Rinconada fault, CA [see also F0374R]	A	Durham, 1965	17.7		<5		3.42	4.01	6.97	15	88.2	24.1
F0826	R	southern Rinconada fault, CA [see also F0374R]	A	Hart, 1976	53		22		2.3	2.41	2.41	2.41	2.53	0.0593
F0826	R	southern Rinconada fault, CA [see also F0374R]	A	Graham, 1978	43		23	0	1.78	1.87	1.87	1.87	1.96	0.0461
F0826	R	southern Rinconada fault, CA [see also F0374R]	C	Stewart and Crowell, 1992	60		66.4-23.7		0.863	1.02	1.33	1.45	2.48	0.456
F0826	R	southern Rinconada fault, CA [see also F0374R]	C	Stewart and Crowell, 1992	18		5.3-3.4		3.38	3.6	4.14	4.21	5.28	0.556
F0826	R	southern Rinconada fault, CA [see also F0374R]	S	combined offset rate (5 GCN data)					1.85	3.79	4.05	4.2	5.26	5.37
F2077	R	Superstition Hills dextral fault, CA	C	Petersen and Wesnousky, 1994	0.0011	0.00005	0.00033	0	0.955	4.19	6.63	9.7	33.5	10.7
F2077	R	Superstition Hills dextral fault, CA	S	combined offset rate (1 GCN data)					0.416	2.29E-6	6.61	9.98	36.5	11
F2078	T	Table Bluff thrust fault, CA	C	Petersen et al., 1996	0.424		~1?	0	0.214	0.31	0.418	0.753	2.58	3.28
F2078	T	Table Bluff thrust fault, CA	S	combined offset rate (1 GCN data)					0.0247	2.29E-6	0.408	0.723	2.52	3.05
F2346	N	Tank Canyon normal fault, CA	S	combined offset rate (0 GCN data)					0.000304	0.00102	0.183	0.25	1.09	0.343
F1434	T	thrust (?) f btw Sur, Sta Cruz basins, off CA	S	combined offset rate (0 GCN data)					0.000958	0.000519	0.228	0.544	2.41	0.691
F1754	T	thrust of Antelope Buttes, Mojave Desert, CA	S	combined offset rate (0 GCN data)					0.000958	0.000519	0.228	0.544	2.41	0.691
F2079	T	Trinidad thrust fault, CA	S	combined offset rate (0 GCN data)					0.000958	0.000519	0.228	0.544	2.41	0.691
F1405	D	Tucki Mountain detachment fault, CA	S	combined offset rate (0 GCN data)					0.0453	0.0499	1.17	3.93	30.6	7.45
F1907	T	Upper Elysian Park blind thrust, CA	S	combined offset rate (0 GCN data)					0.000958	0.000519	0.228	0.544	2.41	0.691
F1953	R	Warm Springs Valley dex. f., CA-NV [F0686N]	S	combined offset rate (0 GCN data)					0.0381	0.00713	6.18	11.6	42.8	12.6
F0686	N	Warm Springs Valley normal f, NV-CA [F1953R]	S	combined offset rate (0 GCN data)					0.000304	0.00102	0.183	0.25	1.09	0.343
F2080	R	West Napa dextral fault, CA	S	combined offset rate (0 GCN data)					0.0381	0.00713	6.18	11.6	42.8	12.6
F0539	L	western Garlock sinistral fault, CA [see F0439L]	A	Burke and Clark, 1978	0.08		0.0147	0	4.59	5.46	5.46	5.46	6.32	0.439
F0539	L	western Garlock sinistral fault, CA [see F0439L]	A	Carter, 1982	43		3.8-3	0	11.3	11.7	12.9	13.4	18.5	1.97
F0539	L	western Garlock sinistral fault, CA [see F0439L]	C	Petersen and Wesnousky, 1994 (neotectonic rate)	0.2-0.3		.09-.19	0	1.14	1.55	1.79	1.87	2.98	0.489
F0539	L	western Garlock sinistral fault, CA [see F0439L]	C	Petersen and Wesnousky, 1994 (neotectonic rate)	.075-.085		.011-.015	0	4.95	5.91	6.15	6.21	7.74	0.734
F0539	L	western Garlock sinistral fault, CA [see F0439L]	S	combined offset rate (4 GCN data)					4.97	5.57	5.62	5.68	6.43	0.883
F2081	R	White Mountains dextral fault, CA	S	combined offset rate (0 GCN data)					0.0381	0.00713	6.18	11.6	42.8	12.6
F0878	P	White Wolf-Wheeler Ridge-Pleito plate, CA	B	Stein and Thatcher, 1981 (throw 3.6-5.1 km)	>7.7		1.2-0.6	0	6.72	7.98	9.61	10.1	15.7	2.47
F0878	P	White Wolf-Wheeler Ridge-Pleito plate, CA	B	Stein and Thatcher, 1981 (throw 5.0 km)	>10.7		20-15	0	2	4.3	4.48	4.72	9.07	1.87
F0878	P	White Wolf-Wheeler Ridge-Pleito plate, CA	A	Namson and Davis, 1988	17		3	0	4.24	5.38	5.67	5.84	8.44	1.08
F0878	P	White Wolf-Wheeler Ridge-Pleito plate, CA	A	Medwedeff, 1992 (neotectonic rate)	0.66		0.15	0	4.29	4.6	5.04	6.04	12.8	5.56
F0878	P	White Wolf-Wheeler Ridge-Pleito plate, CA	S	combined offset rate (4 GCN data)					4.63	6.65	6.71	6.65	8.08	0.8
F0878	L	White Wolf-Wheeler Ridge-Pleito sin. f., CA	S	combined offset rate (0 GCN data)					0.00356	0.00356	2.23	4.33	15.4	4.56
F0365	R	Whittier dextral fault, CA [see paleo-F1861D]	A	Lamar, 1961	5.2		5-3.5		0.94	1.18	1.22	1.22	1.48	0.15
F0365	R	Whittier dextral fault, CA [see paleo-F1861D]	B	Crouch and Suppe, 1993 (total right slip; none ol	<15		3.4		0.111	0.00854	2.21	2.21	4.33	1.28
F0365	R	Whittier dextral fault, CA [see paleo-F1861D]	A	Gath et al., 1988 (neotectonic rate)	0.4		0.2-0.14	0	1.34	2.14	2.19	2.21	3.18	0.481
F0365	R	Whittier dextral fault, CA [see paleo-F1861D]	S	combined offset rate (3 GCN data)					1.07	1.44	1.37	1.45	2.65	0.554
F1541	P	W-vergent thrusts in basal Great Vly seq., CA	A	Glen, 1990	>7		<88.5?		0.342	2.1	4.45	10.3	66.8	20.6
F1541	P	W-vergent thrusts in basal Great Vly seq., CA	S	combined offset rate (1 GCN data)					0.569	2.88	4.67	7.32	37.8	14.6
F2082	R	Zayante-Vergeles dextral fault, CA [see paleo-N]	S	combined offset rate (0 GCN data)					0.0381	0.00713	6.18	11.6	42.8	12.6
F0835	N	Alvarado normal fault, CO	C	Christiansen and Yeats, 1992	~6		<13	3	0.0000115	1.37E-6	0.000317	0.000466	0.00176	0.00048
F0835	N	Alvarado normal fault, CO	S	combined offset rate (1 GCN data)					0.0000134	8.16E-8	0.000397	0.0367	0.399	0.157
F0834	N	Blue River normal fault, CO	B	Tweto, 1979b	0.35?		24-20		0.0144	0.0152	0.017	0.0183	0.0292	0.00448
F0834	N	Blue River normal fault, CO	S	combined offset rate (1 GCN data)					0.000533	0.0153	0.0214	0.15	0.828	0.283
F0885	N	buried normal fault below San Luis Valley, CO	A	McCalpin, 1982	1.85		<35	5.3-~0.8	0.0000113	2.55E-6	0.00033	0.00057	0.0026	0.000737
F0885	N	buried normal fault below San Luis Valley, CO	S	combined offset rate (1 GCN data)					0.0000119	8.16E-8	0.000353	0.0113	0.116	0.0873
F0886	N	buried normal fault below San Luis Valley, CO	A	McCalpin, 1982	1.6		<35	5.3-~0.8	0.0000113	2.55E-6	0.00033	0.00057	0.0026	0.000737
F0886	N	buried normal fault below San Luis Valley, CO	S	combined offset rate (1 GCN data)					0.0000119	8.16E-8	0.000353	0.0113	0.116	0.0873
F0887	N	buried normal fault below San Luis Valley, CO	A	McCalpin, 1982	1.0		<35	5.3-~0.8	0.0000113	2.55E-6	0.00033	0.00057	0.0026	0.000737
F0887	N	buried normal fault below San Luis Valley, CO	S	combined offset rate (1 GCN data)					0.0000119	8.16E-8	0.000353	0.0113	0.116	0.0873
F2385	N	Cheraw normal fault, CO (Great Plains)	A	Crone and Machette, 1997 {neotectonic slip rate}	{0.00325}		0.025	0	0.0163	0.109	0.113	0.118	0.257	0.0585
F2385	N	Cheraw normal fault, CO (Great Plains)	S	combined offset rate (1 GCN data)					0.0118	0.109	0.114	0.124	0.296	0.0951
F0028	N	Cunningham Park & Big Creek Park n. faults, WY-CO	A	De la Montagne, 1953	0.4		5.3		0.057	0.0755	0.0755	0.0755	0.094	0.00946
F0028	N	Cunningham Park & Big Creek Park n. faults, WY-CO	S	combined offset rate (1 GCN data)					0.0017	0.0754	0.0762	0.107	0.434	0.16
F0466	N	Current Creek(?) normal fault, CO [c.f. F0861R]	B	Epis et al., 1976			~20-16.6	5.3-~3	8.41E-6	1.37E-6	0.000233	0.000345	0.00131	0.000359
F0466	N	Current Creek(?) normal fault, CO [c.f. F0861R]	C	Christiansen and Yeats, 1992	~6		<13	3	0.0000115	1.37E-6	0.000317	0.000466	0.00176	0.00048
F0466	N	Current Creek(?) normal fault, CO [c.f. F0861R]	S	combined offset rate (2 GCN data)					5.5E-6	8.16E-8	0.000153	0.00364	0.00119	0.0494
F0470	N	Dead Horse normal fault, CO	A	Knepper, 1976	0.12		16.6-5.3	<5.3	0.00722	0.00782	0.011	0.0121	0.0216	0.00412
F0470	N	Dead Horse normal fault, CO	S	combined offset rate (1 GCN data)					0.000862	0.00783	0.0132	0.096	0.599	0.233
F0467	N	Florissant(?) normal fault, CO	B	Epis et al., 1976			~20-16.6	5.3-~3	8.41E-6	1.37E-6	0.000233	0.000345	0.00131	0.000359
F0467	N	Florissant(?) normal fault, CO	S	combined offset rate (1 GCN data)					9.35E-6	8.16E-8	0.000268	0.0238	0.332	0.128
F0458	N	Fourmile Creek normal fault, CO	B	Sanders, 1975			<23.7	>1.6	8.86E-6	1.11E-6	0.000269	0.000446	0.0019	0.000524
F0458	N	Fourmile Creek normal fault, CO	B	Epis et al., 1976			~20-16.6	5.3-~3	8.41E-6	1.37E-6	0.000233	0.000345	0.00131	0.000359
F0458	N	Fourmile Creek normal fault, CO	A	Knepper, 1976	0.6		16.6-5.3	<5.3	0.0346	0.0408	0.0548	0.0606	0.11	0.0211
F0458	N	Fourmile Creek normal fault, CO	C	Christiansen and Yeats, 1992	~6		<13	3	0.0000115	1.37E-6	0.000317	0.000466	0.00176	0.00048
F0458	N	Fourmile Creek normal fault, CO	S	combined offset rate (4 GCN data)					3E-6	8.16E-8	0.0000808	0.00012	0.000459	0.000126
F0833	N	Gore normal fault, CO	B	Tweto, 1979b	0.35		24-20		0.0144	0.0152	0.017	0.0183	0.0292	0.00448
F0833	N	Gore normal fault, CO	S	combined offset rate (1 GCN data)					0.000533	0.0153	0.0214	0.15	0.828	0.283
F0983	N	normal fault of San Juan Mts.\San Luis graben, CO	S	combined offset rate (0 GCN data)					0.000304	0.00102	0.183	0.25	1.09	0.343
F0471	N	normal fault on SW side of S. Arkansas graben, CO	A	Knepper, 1976	1.1-2.8		16.6-5.3	<5.3	0.0693	0.147	0.178	0.197	0.418	0.0897
F0471	N	normal fault on SW side of S. Arkansas graben, CO	S	combined offset rate (1 GCN data)					0.000862	0.00199	0.179	0.216	0.602	0.217
F0461	N	normal fault SE of Alamosa, CO	B	Taylor, 1975	11		<26		0.427	0.461	0.845	2.67	15.8	9.45
F0461	N	normal fault SE of Alamosa, CO	S	combined offset rate (1 GCN data)					0.000533	2.29E-6	0.427	1.28	7.03	6.3
F0469	N	normal fault SW of Antero basin, CO	A	Knepper, 1976	<0.3		~5.3(?)		0.00154	0.00245	0.0284	0.0292	0.063	0.0176
F0469	N	normal fault SW of Antero basin, CO	S	combined offset rate (1 GCN data)					0.000917	0.00203	0.0314	0.0687	0.434	0.169
F0406	N	normal fault swarm of South Park, CO	A	Hail, 1968 (maximum net throw of system)	0.3		<52		0.00505	0.00692	0.0115	0.061	0.231	1.15
F0406	N	normal fault swarm of South Park, CO	S	combined offset rate (1 GCN data)					0.000585	0.0069	0.0263	0.16	0.855	0.835
F0599	N	normal fault, 37N, 104W, CO	S	combined offset rate (0 GCN data)					0.000304	0.00102	0.183	0.25	1.09	0.343
F0598	N	normal fault, 39N, 106-107W, CO	S	combined offset rate (0 GCN data)					0.000304	0.00102	0.183	0.25	1.09	0.343
F0455	N	normal faults N of State Bridge, CO	S	combined offset rate (0 GCN data)					0.000304	0.00102	0.183	0.25	1.09	0.343
F0460	N	Northern Sangre de Cristo n. f., CO [c.f. F0371N]	B	Taylor, 1975	3		<26		0.101	0.138	0.231	0.874	4.53	5.05
F0460	N	Northern Sangre de Cristo n. f., CO [c.f. F0371N]	B	Epis et al., 1976			~20-16.6	5.3-~3	8.41E-6	1.37E-6	0.000233	0.000345	0.00131	0.000359
F0460	N	Northern Sangre de Cristo n. f., CO [c.f. F0371N]	A	Knepper, 1976	>0.9		~5.3(?)		0.179	0.297	0.337	0.441	1.53	0.386
F0460	N	Northern Sangre de Cristo n. f., CO [c.f. F0371N]	A	McCalpin, 1982	>5.4		<35	0	0.196	0.28	0.605	2.17	13	8.6
F0460	N	Northern Sangre de Cristo n. f., CO [c.f. F0371N]	A	Lindsey et al., 1983	2.1		29-27	0	0.0699	0.0749	0.075	0.0751	0.0805	0.00272
F0460	N	Northern Sangre de Cristo n. f., CO [c.f. F0371N]	C	Christiansen and Yeats, 1992	~6		<13	3	0.0000115	1.37E-6	0.000317	0.000466	0.00176	0.00048
F0460	N	Northern Sangre de Cristo n. f., CO [c.f. F0371N]	S	combined offset rate (6 GCN data)					7.13E-6	2.29E-6	0.000137	0.00454	0.000908	0.0489
F2367	N	Poncha Pass normal fault, CO	S	combined offset rate (0 GCN data)					0.000304	0.00102	0.183	0.25	1.09	0.343
F0837	N	Rampart normal fault, CO [see also F0033T]	B	Tweto, 1979b	>0.45		36-35		0.0158	0.0152	0.256	0.312	1.23	0.357
F0837	N	Rampart normal fault, CO [see also F0033T]	S	combined offset rate (1 GCN data)					0.000531	9.32E-8	0.222	0.276	1.15	0.35
F0459	N	Southern Sawatch Range normal fault, CO	B	Taylor, 1975	3		<26		0.101	0.138	0.231	0.874	4.53	5.05
F0459	N	Southern Sawatch Range normal fault, CO	A	Knepper, 1976	1.5-3.0		16.6-5.3	<5.3	0.0995	0.167	0.205	0.227	0.455	0.0933
F0459	N	Southern Sawatch Range normal fault, CO	C	Christiansen and Yeats, 1992	~6		<13	3	0.0000115	1.37E-6	0.000317	0.000466	0.00176	0.00048
F0459	N	Southern Sawatch Range normal fault, CO	C	Haller et al., 2002 (2308b; Southern Sawatch Rang	.008-.010		0.16-0.13	0	0.0329	0.0615	0.0622	0.0624	0.0928	0.0145
F0459	N	Southern Sawatch Range normal fault, CO	C	USGS Quaternary Fault & Fold Database, 2005.01	0.002		0.04-0.01	0	0.00575	0.0855	0.095	0.134	0.441	0.642
F0459	N	Southern Sawatch Range normal fault, CO	S	combined offset rate (4* GCN data)					0.0684	0.101	0.0981	0.0985	0.135	0.0179
F0453	N	Westcliffe normal fault, CO	B	Epis et al., 1976			~20-16.6	5.3-~3	8.41E-6	1.37E-6	0.000233	0.000345	0.00131	0.000359
F0453	N	Westcliffe normal fault, CO	C	Christiansen and Yeats, 1992	~6		<13	3	0.0000115	1.37E-6	0.000317	0.000466	0.00176	0.00048
F0453	N	Westcliffe normal fault, CO	S	combined offset rate (2 GCN data)					5.5E-6	8.16E-8	0.000153	0.00364	0.00119	0.0494
F0836	N	Wet Mountains normal fault, CO [see also F0024T]	S	combined offset rate (0 GCN data)					0.000304	0.00102	0.183	0.25	1.09	0.343
F0468	N	Woodland Park(?) normal fault, CO	B	Epis et al., 1976			~20-16.6	5.3-~3	8.41E-6	1.37E-6	0.000233	0.000345	0.00131	0.000359
F0468	N	Woodland Park(?) normal fault, CO	S	combined offset rate (1 GCN data)					9.35E-6	8.16E-8	0.000268	0.0238	0.332	0.128
F0567	N	Beaverhead normal fault, ID	B	Pierce and Morgan, 1992	1.5-2		6.5-4.3	<4.3	0.243	0.306	0.324	0.329	0.434	0.0505
F0567	N	Beaverhead normal fault, ID	C	Stewart, 1998 (scarp height only)	0.3-1.8		<6	0	0.0574	0.199	0.356	1.26	6.93	6.26
F0567	N	Beaverhead normal fault, ID	S	combined offset rate (2 GCN data)					0.0485	0.307	0.317	0.468	1.22	2.54
F2084	N	Big Flat-Jakes Creek normal fault, ID	S	combined offset rate (0 GCN data)					0.000304	0.00102	0.183	0.25	1.09	0.343
F2308	N	Cuddy Mountain-Lick Creek normal fault, ID	S	combined offset rate (0 GCN data)					0.000304	0.00102	0.183	0.25	1.09	0.343
F2312	N	Halfway n. f. of Pine Valley graben, OR-ID	C	Personius et al., 2003 (809)	0.17		12?	<1.6	0.0128	0.0141	0.0142	0.0142	0.0157	0.000743
F2312	N	Halfway n. f. of Pine Valley graben, OR-ID	S	combined offset rate (1 GCN data)					0.000638	0.0141	0.0147	0.127	0.731	0.264
F0565	N	Lemhi normal fault, ID	B	Pierce and Morgan, 1992	1.5-2		6.5-4.3	<4.3	0.243	0.306	0.324	0.329	0.434	0.0505
F0565	N	Lemhi normal fault, ID	C	Stewart, 1998 (scarp height only)	0.3-1.8		<6	0	0.0574	0.199	0.356	1.26	6.93	6.26
F0565	N	Lemhi normal fault, ID	S	combined offset rate (2 GCN data)					0.0485	0.307	0.317	0.468	1.22	2.54
F1967	N	Long Valley normal fault, ID	C	Pezzopane and Weldon, 1993 (neotectonic rate)	<1.6		<~1.2	0	0.0664	1.05	1.33	3.77	24	11.7
F1967	N	Long Valley normal fault, ID	S	combined offset rate (1 GCN data)					0.00215	2.29E-6	1.11	3.26	20.8	10.9
F0563	N	Lost River normal fault, ID	B	Pierce and Morgan, 1992	1.5-2		6.5-4.3	<4.3	0.243	0.306	0.324	0.329	0.434	0.0505
F0563	N	Lost River normal fault, ID	B	Pierce and Morgan, 1992 (neotectonic rate)	0.015		0.15	0	0.0806	0.107	0.117	0.147	0.299	0.781
F0563	N	Lost River normal fault, ID	C	Frankel et al., 1996	.0035-.0045		<0.015	0	0.129	0.313	0.547	1.83	10.5	7.66
F0563	N	Lost River normal fault, ID	C	Stewart, 1998 (scarp height only)	0.3-1.8		<6	0	0.0574	0.199	0.356	1.26	6.93	6.26
F0563	N	Lost River normal fault, ID	S	combined offset rate (4 GCN data)					0.232	0.285	0.299	0.303	0.394	0.042
F0551	N	normal fault, 48N, 116W, ID	S	combined offset rate (0 GCN data)					0.000304	0.00102	0.183	0.25	1.09	0.343
F2388	N	Rush Peak normal fault, ID	S	combined offset rate (0 GCN data)					0.000304	0.00102	0.183	0.25	1.09	0.343
F0562	N	Sawtooth normal fault, ID	S	combined offset rate (0 GCN data)					0.000304	0.00102	0.183	0.25	1.09	0.343
F2085	N	Squaw Creek normal fault, ID	S	combined offset rate (0 GCN data)					0.000304	0.00102	0.183	0.25	1.09	0.343
F0428	N	Blacktail normal fault, MT	A	Monroe, 1976	1.1		~38	8	4.3E-6	7.65E-7	0.000118	0.00017	0.00063	0.00017
F0428	N	Blacktail normal fault, MT	C	Stewart, 1998 (scarp height only)	0.3-1.8		<19	0	0.00813	0.0855	0.111	0.461	2.23	3.55
F0428	N	Blacktail normal fault, MT	C	Haller et al., 2002 (644)	.004-.005		<0.15	0	0.00264	0.0285	0.0528	0.247	1.12	2.51
F0428	N	Blacktail normal fault, MT	S	combined offset rate (2* GCN data)					0.00166	2.29E-6	0.0597	0.196	0.824	1.99
F0964	N	Bridger normal fault, MT	C	Stewart, 1998 (scarp height only)	0.3-1.8		<19	0	0.00813	0.0855	0.111	0.461	2.23	3.55
F0964	N	Bridger normal fault, MT	S	combined offset rate (1 GCN data)					0.000507	2.29E-6	0.138	0.338	1.43	2.3
F2086	N	Canyon Ferry normal fault, MT	S	combined offset rate (0 GCN data)					0.000304	0.00102	0.183	0.25	1.09	0.343
F1292	N	Centennial normal fault, MT	B	Pierce and Morgan, 1992 (Quaternary rate only)	1.5-1.8		2	0	0.542	0.742	0.825	0.891	1.63	0.317
F1292	N	Centennial normal fault, MT	C	Frankel et al., 1996	<0.02		0.015	0	0.0537	0.387	0.694	0.736	1.68	0.451
F1292	N	Centennial normal fault, MT	C	Stewart, 1998 (scarp height only)	0.3-1.8		<19	0	0.00813	0.0855	0.111	0.461	2.23	3.55
F1292	N	Centennial normal fault, MT	C	Haller et al., 2002 (643; Quaternary rate only)	1.5-1.8		2	0	0.542	0.742	0.825	0.891	1.63	0.317
F1292	N	Centennial normal fault, MT	S	combined offset rate (4 GCN data)					0.559	0.684	0.734	0.75	1.03	0.122
F2087	N	Emigrant normal fault, MT	C	USGS Quaternary Fault & Fold Database, 2005 (N se	0.2-0.3		1.8	0	0.102	0.139	0.139	0.139	0.176	0.0189
F2087	N	Emigrant normal fault, MT	C	USGS Quaternary Fault & Fold Database, 2005 (N se	0.035		0.2-0.1	0	0.132	0.187	0.233	0.324	0.845	1.35
F2087	N	Emigrant normal fault, MT	S	combined offset rate (2 GCN data)					0.113	0.148	0.15	0.172	0.37	0.483
F0561	N	Georgia Gulch normal fault, MT	C	Stewart, 1998 (scarp height only)	0.3-1.8		<19	0	0.00813	0.0855	0.111	0.461	2.23	3.55
F0561	N	Georgia Gulch normal fault, MT	C	Haller et al., 2002 (667)	0.004		~0.13?	0	0.00158	0.0285	0.0317	0.0428	0.111	0.485
F0561	N	Georgia Gulch normal fault, MT	S	combined offset rate (2 GCN data)					0.00123	2.29E-6	0.0358	0.084	0.397	0.948
F1293	N	Hebgen-Red Canyon normal fault, MT	C	Stewart, 1998 (scarp height only)	0.3-1.8		<19	0	0.00813	0.0855	0.111	0.461	2.23	3.55
F1293	N	Hebgen-Red Canyon normal fault, MT	S	combined offset rate (1 GCN data)					0.000507	2.29E-6	0.138	0.338	1.43	2.3
F2089	N	Helena Valley normal fault, MT	S	combined offset rate (0 GCN data)					0.000304	0.00102	0.183	0.25	1.09	0.343
F2090	N	Jocko normal fault, MT	S	combined offset rate (0 GCN data)					0.000304	0.00102	0.183	0.25	1.09	0.343
F0384	N	Madison normal fault, MT	A	Kuenzi, 1966			3.4	0.2?	0.00017	0.000112	0.00473	0.00717	0.0281	0.00796
F0384	N	Madison normal fault, MT	C	Dickinson et al., 1988			<75	>48	3.88E-7	3.39E-8	0.0000112	0.0000174	0.0000702	0.0000192
F0384	N	Madison normal fault, MT	B	Pierce and Morgan, 1992 (neotectonic rate)	0.8-0.9		2	0	0.283	0.382	0.425	0.459	0.835	0.162
F0384	N	Madison normal fault, MT	C	Stewart, 1998 (scarp height only)	0.3-1.8		<19	0	0.00813	0.0855	0.111	0.461	2.23	3.55
F0384	N	Madison normal fault, MT	C	USGS Quaternary Fault & Fold Database, 2005.01	0.8-0.9		2	0	0.283	0.382	0.425	0.459	0.835	0.162
F0384	N	Madison normal fault, MT	C	USGS Quaternary Fault & Fold Database, 2005.01	.006-.008		.04-.02?	0	0.0944	0.206	0.235	0.253	0.511	0.108
F0384	N	Madison normal fault, MT	C	USGS Quaternary Fault & Fold Database, 2005.01	0.011		0.03	0	0.265	0.428	0.551	1.43	6.87	6.12
F0384	N	Madison normal fault, MT	S	combined offset rate (5* GCN data)					0.29	0.349	0.362	0.365	0.466	0.0452
F2091	N	Mission normal fault, MT	C	Haller et al., 2002 (699)	.004-.007		.19-.15	0	0.00921	0.0321	0.0326	0.033	0.0593	0.0123
F2091	N	Mission normal fault, MT	S	combined offset rate (1 GCN data)					0.00188	0.032	0.0337	0.0645	0.399	0.152
F0926	N	normal fault between Madison Range & M. Cyn., MT	C	Stewart, 1998 (scarp height only)	0.3-1.8		<19	0	0.00813	0.0855	0.111	0.461	2.23	3.55
F0926	N	normal fault between Madison Range & M. Cyn., MT	S	combined offset rate (1 GCN data)					0.000507	2.29E-6	0.138	0.338	1.43	2.3
F0877	N	normal fault of lower Red Rock river valley, MT	A	Johnson, 1981	3		<22	0	0.119	0.163	0.273	1.01	5.33	5.48
F0877	N	normal fault of lower Red Rock river valley, MT	C	Stewart, 1998 (scarp height only)	0.3-1.8		<19	0	0.00813	0.0855	0.111	0.461	2.23	3.55
F0877	N	normal fault of lower Red Rock river valley, MT	S	combined offset rate (2 GCN data)					0.000975	2.29E-6	0.184	0.499	2.16	3.37
F0555	N	normal fault, 48N, 114W, MT	S	combined offset rate (0 GCN data)					0.000304	0.00102	0.183	0.25	1.09	0.343
F0552	N	normal fault, 48N, 115-116W, ID-MT	S	combined offset rate (0 GCN data)					0.000304	0.00102	0.183	0.25	1.09	0.343
F0553	N	normal fault, 48N, 115W, MT	S	combined offset rate (0 GCN data)					0.000304	0.00102	0.183	0.25	1.09	0.343
F0554	N	normal fault, 48N, 115W, MT	S	combined offset rate (0 GCN data)					0.000304	0.00102	0.183	0.25	1.09	0.343
F2093	N	Red Rock Hills normal fault, MT	C	USGS Quaternary Fault & Fold Database, 2005.01	.003-.004		.035-.012	0	0.0292	0.126	0.154	0.171	0.396	0.0926
F2093	N	Red Rock Hills normal fault, MT	S	combined offset rate (1 GCN data)					0.002	0.0017	0.156	0.183	0.471	0.158
F2092	N	Red Rock normal fault, MT	C	USGS Quaternary Fault & Fold Database, 2005.01	0.0025		.015-.005	0	0.0414	0.215	0.273	0.305	0.734	0.174
F2092	N	Red Rock normal fault, MT	S	combined offset rate (1 GCN data)					0.00202	0.00121	0.266	0.297	0.762	0.208
F0899	N	Roosevelt normal fault, MT	A	Mudge, 1982	2.7		57.8-40	<16	0.0467	0.0486	0.0553	0.0571	0.0769	0.00822
F0899	N	Roosevelt normal fault, MT	S	combined offset rate (1 GCN data)					0.000582	8.16E-8	0.06	0.158	0.78	0.266
F2094	N	Sweetwater normal fault, MT	C	Haller et al., 2002 (645; revised age assignment)	0.25		6	0	0.0356	0.0411	0.0417	0.042	0.05	0.00368
F2094	N	Sweetwater normal fault, MT	S	combined offset rate (1 GCN data)					0.000978	0.0411	0.0426	0.107	0.559	0.214
F1270	L	Thompson Pass sinistral fault, ID-MT	C	Hyndman et al., 1988	<90		<97.5	<70	0.046	0.599	0.923	2.79	17.2	9.88
F1270	L	Thompson Pass sinistral fault, ID-MT	S	combined offset rate (1 GCN data)					0.00545	2.29E-6	1.56	3.75	15.6	7.09
F2095	N	Thompson Valley normal fault, MT	C	Haller et al., 2002 (696)	0.0064		0.13-0.06	0	0.026	0.0583	0.0676	0.0713	0.132	0.0266
F2095	N	Thompson Valley normal fault, MT	S	combined offset rate (1 GCN data)					0.00215	0.0583	0.0693	0.0973	0.399	0.147
F0747	N	Alamogordo normal fault, NM	B	Seager et al., 1984			9	3	0.0000115	1.37E-6	0.000317	0.000466	0.00176	0.00048
F0747	N	Alamogordo normal fault, NM	C	USGS Quaternary Fault & Fold Database, 2005.01	.003-.018		<1.8?	0	0.00176	0.0285	0.0352	0.118	0.461	1.62
F0747	N	Alamogordo normal fault, NM	S	combined offset rate (1* GCN data)					0.00104	2.29E-6	0.0379	0.138	0.632	1.5
F2370	N	Black Mesa normal fault, NM	S	combined offset rate (0 GCN data)					0.000304	0.00102	0.183	0.25	1.09	0.343
F0745	N	Caballo normal fault, NM	C	Dickinson, 1979			30-15	5-1	0.00166	0.0285	0.0331	0.0868	0.314	1.17
F0745	N	Caballo normal fault, NM	B	Seager et al., 1984	2.4		9	3	0.0000115	1.37E-6	0.000317	0.000466	0.00176	0.00048
F0745	N	Caballo normal fault, NM	C	Keller et al., 1990			10	3	0.0000115	1.37E-6	0.000317	0.000466	0.00176	0.00048
F0745	N	Caballo normal fault, NM	C	Stewart, 1998			10	7	4.92E-6	9.14E-7	0.000135	0.000195	0.000722	0.000195
F0745	N	Caballo normal fault, NM	C	USGS Quaternary Fault & Fold Database, 2005.01	.005-.008		<0.25	0	0.00207	0.0285	0.0413	0.176	0.755	2.07
F0745	N	Caballo normal fault, NM	C	USGS Quaternary Fault & Fold Database, 2005.01	.025-.048		0.9-0.5	0	0.028	0.0484	0.0521	0.054	0.0895	0.0157
F0745	N	Caballo normal fault, NM	S	combined offset rate (2* GCN data)					0.0135	0.0484	0.0471	0.0682	0.167	0.732
F0851	N	Caballo-Campo Grande n. f., Chih.-TX-NM	B	Seager et al., 1984			9	3	0.0000115	1.37E-6	0.000317	0.000466	0.00176	0.00048
F0851	N	Caballo-Campo Grande n. f., Chih.-TX-NM	C	Christiansen and Yeats, 1992			28-23	17	2.02E-6	3.1E-7	0.0000554	0.0000799	0.000295	0.0000797
F0851	N	Caballo-Campo Grande n. f., Chih.-TX-NM	S	combined offset rate (2 GCN data)					2.08E-6	2.08E-7	0.0000575	0.00354	0.0011	0.0494
F1329	N	Canones normal fault, NM	A	Baldridge et al., 1994 (total throw of 8 faults)	1.1		>10	7.8-2.8	6.5E-6	5.99E-7	0.000183	0.000278	0.0011	0.000302
F1329	N	Canones normal fault, NM	C	Stewart, 1998			8	3	0.0000115	1.37E-6	0.000317	0.000466	0.00176	0.00048
F1329	N	Canones normal fault, NM	S	combined offset rate (2 GCN data)					4.5E-6	8.16E-8	0.000124	0.00175	0.000853	0.0335
F2368	N	East Franklin Mountains normal fault, NM-TX	S	combined offset rate (0 GCN data)					0.000304	0.00102	0.183	0.25	1.09	0.343
F2369	N	Embudo normal fault, NM [c.f. F0870L]	S	combined offset rate (0 GCN data)					0.000304	0.00102	0.183	0.25	1.09	0.343
F0870	L	Embudo-Velarde sinistral fault, NM	S	combined offset rate (0 GCN data)					0.00356	0.00356	2.23	4.33	15.4	4.56
F2371	N	Gallina normal fault, NM	S	combined offset rate (0 GCN data)					0.000304	0.00102	0.183	0.25	1.09	0.343
F1257	N	Hickman normal fault, NM [see also F1256T]	A	Cather, 1990	0.3		36	32	1.08E-6	1.56E-7	0.0000294	0.0000424	0.000157	0.0000423
F1257	N	Hickman normal fault, NM [see also F1256T]	S	combined offset rate (1 GCN data)					1.21E-6	1.04E-7	0.0000315	0.0108	0.117	0.0874
F2392	N	Hubbell Spring normal fault, NM	C	USGS Quaternary Fault & Fold Database, 2005.01	.002-.011		0.15-0.01	0	0.00462	0.0855	0.0886	0.142	0.607	0.545
F2392	N	Hubbell Spring normal fault, NM	S	combined offset rate (1 GCN data)					0.00151	2.29E-6	0.0917	0.158	0.679	0.523
F2372	N	Jemez-San Ysidro normal fault, NM	C	USGS Quaternary Fault & Fold Database, 2005.01	.012-.05		1.2	0	0.00626	0.0258	0.0259	0.0261	0.0471	0.0104
F2372	N	Jemez-San Ysidro normal fault, NM	S	combined offset rate (1 GCN data)					0.00182	0.0258	0.0271	0.0586	0.399	0.153
F0986	N	Jornada del Muerto normal fault, NM	S	combined offset rate (0 GCN data)					0.000304	0.00102	0.183	0.25	1.09	0.343
F2373	N	La Bajada normal fault, NM	C	USGS Quaternary Fault & Fold Database, 2005.01	0.25		2.5	0	0.0944	0.0999	0.1	0.1	0.106	0.00293
F2373	N	La Bajada normal fault, NM	C	USGS Quaternary Fault & Fold Database, 2005.01	0.09		1.16	0	0.0685	0.0776	0.0776	0.0776	0.0867	0.00462
F2373	N	La Bajada normal fault, NM	S	combined offset rate (2 GCN data)					0.0727	0.0937	0.0938	0.0959	0.104	0.055
F2374	N	La Canada del Amagre-Clara Peak n.f., NM	C	USGS Quaternary Fault & Fold Database, 2005.01	0.53		10.6-5?	0	0.0506	0.0514	0.0679	0.0716	0.109	0.0167
F2374	N	La Canada del Amagre-Clara Peak n.f., NM	S	combined offset rate (1 GCN data)					0.000814	8.16E-8	0.0726	0.138	0.62	0.227
F2375	N	La Jencia normal fault, NM	S	combined offset rate (0 GCN data)					0.000304	0.00102	0.183	0.25	1.09	0.343
F0980	D	Lemitar-Ladron-Lucero Mts. ext. zone, NM	A	Chamberlin, 1983a	>2.1		31	7	5.64E-6	3.49E-7	0.000155	0.000224	0.000829	0.000224
F0980	D	Lemitar-Ladron-Lucero Mts. ext. zone, NM	A	Chamberlin, 1983b	>4.2			30-2	2.8E-6	0.0000128	0.0000741	0.000153	0.000813	0.000254
F0980	D	Lemitar-Ladron-Lucero Mts. ext. zone, NM	C	Stewart, 1998			31	27	1.46E-6	2.14E-7	0.00004	0.0000577	0.000213	0.0000575
F0980	D	Lemitar-Ladron-Lucero Mts. ext. zone, NM	S	combined offset rate (3 GCN data)					1.51E-6	5.71E-7	0.0000238	0.00111	0.000161	0.139
F2377	N	Lobata Mesa normal fault, NM	C	USGS Quaternary Fault & Fold Database, 2005.01	0.5		10.6	0	0.0379	0.0472	0.0472	0.0472	0.0564	0.00472
F2377	N	Lobata Mesa normal fault, NM	C	USGS Quaternary Fault & Fold Database, 2005.01	0.015		1.59-1.22	0	0.00755	0.0104	0.0107	0.0107	0.0142	0.00164
F2377	N	Lobata Mesa normal fault, NM	S	combined offset rate (2 GCN data)					0.00578	0.0104	0.0113	0.0457	0.374	0.143
F0753	N	Manzano-Rincon normal fault, NM	C	Christiansen and Yeats, 1992	~6		<13	3	0.0000115	1.37E-6	0.000317	0.000466	0.00176	0.00048
F0753	N	Manzano-Rincon normal fault, NM	S	combined offset rate (1 GCN data)					0.0000134	8.16E-8	0.000397	0.0367	0.399	0.157
F2378	N	Nacimiento normal fault, NM	S	combined offset rate (0 GCN data)					0.000304	0.00102	0.183	0.25	1.09	0.343
F2379	N	Nambe normal fault, NM	S	combined offset rate (0 GCN data)					0.000304	0.00102	0.183	0.25	1.09	0.343
F0979	N	normal fault NE of Sierra de las Uvas uplift, NM	B	Chapin and Seager, 1975			<23.7	>5.3	2.69E-6	3.06E-7	0.0000817	0.000135	0.000576	0.000158
F0979	N	normal fault NE of Sierra de las Uvas uplift, NM	B	Seager et al., 1984	1.9		23.7	9.6	3.58E-6	8.32E-7	0.0000979	0.000141	0.00052	0.000141
F0979	N	normal fault NE of Sierra de las Uvas uplift, NM	C	Keller et al., 1990			30	15	2.3E-6	3.58E-7	0.0000628	0.0000906	0.000334	0.0000904
F0979	N	normal fault NE of Sierra de las Uvas uplift, NM	C	Stewart, 1998			10	7	4.92E-6	9.14E-7	0.000135	0.000195	0.000722	0.000195
F0979	N	normal fault NE of Sierra de las Uvas uplift, NM	S	combined offset rate (4 GCN data)					8.21E-7	3.34E-7	0.0000203	0.0000298	0.000112	0.0000304
F0978	N	normal fault SW of Caballo uplift, NM	B	Chapin and Seager, 1975			<23.7	>5.3	2.69E-6	3.06E-7	0.0000817	0.000135	0.000576	0.000158
F0978	N	normal fault SW of Caballo uplift, NM	B	Seager et al., 1984	1.9		23.7	9.6	3.58E-6	8.32E-7	0.0000979	0.000141	0.00052	0.000141
F0978	N	normal fault SW of Caballo uplift, NM	C	Keller et al., 1990			10	3	0.0000115	1.37E-6	0.000317	0.000466	0.00176	0.00048
F0978	N	normal fault SW of Caballo uplift, NM	C	Stewart, 1998			10	7	4.92E-6	9.14E-7	0.000135	0.000195	0.000722	0.000195
F0978	N	normal fault SW of Caballo uplift, NM	S	combined offset rate (4 GCN data)					1.08E-6	6.1E-7	0.0000277	0.0000411	0.000157	0.0000427
F0013	N	normal fault W of Cimarron Mts., NM	A	Smith and Ray, 1943	2		<66.4		0.0221	0.0374	0.0603	0.268	1.2	2.61
F0013	N	normal fault W of Cimarron Mts., NM	S	combined offset rate (1 GCN data)					0.000585	0.00203	0.0828	0.259	1.12	1.82
F0985	N	normal fault W of Organ Mountains, NM	C	Keller et al., 1990			10	3	0.0000115	1.37E-6	0.000317	0.000466	0.00176	0.00048
F0985	N	normal fault W of Organ Mountains, NM	C	Stewart, 1998			10	7	4.92E-6	9.14E-7	0.000135	0.000195	0.000722	0.000195
F0985	N	normal fault W of Organ Mountains, NM	S	combined offset rate (2 GCN data)					4.09E-6	6.1E-7	0.000114	0.00545	0.00141	0.0613
F0744	N	normal fault, 31-32N, 107-106W, NM	C	Dickinson, 1979			30-15	5-1	0.00166	0.0285	0.0331	0.0868	0.314	1.17
F0744	N	normal fault, 31-32N, 107-106W, NM	B	Seager et al., 1984	0.7-0.8		9.3	7.1	4.84E-6	1.13E-6	0.000132	0.000191	0.000704	0.00019
F0744	N	normal fault, 31-32N, 107-106W, NM	C	Keller et al., 1990			10	3	0.0000115	1.37E-6	0.000317	0.000466	0.00176	0.00048
F0744	N	normal fault, 31-32N, 107-106W, NM	C	Stewart, 1998			10	7	4.92E-6	9.14E-7	0.000135	0.000195	0.000722	0.000195
F0744	N	normal fault, 31-32N, 107-106W, NM	S	combined offset rate (4 GCN data)					4.28E-6	2.29E-6	0.0000571	0.0000814	0.000295	0.0000792
F1556	N	normal fault, 31-32N, 107-108W, Chih.-NM	C	Keller et al., 1990			30	3	0.0000115	1.37E-6	0.000317	0.000466	0.00176	0.00048
F1556	N	normal fault, 31-32N, 107-108W, Chih.-NM	S	combined offset rate (1 GCN data)					0.0000134	8.16E-8	0.000397	0.0367	0.399	0.157
F0735	N	normal fault, 31-32N, 108W, NM	C	Dickinson, 1979			30-15	5-1	0.00166	0.0285	0.0331	0.0868	0.314	1.17
F0735	N	normal fault, 31-32N, 108W, NM	S	combined offset rate (1 GCN data)					0.00101	2.29E-6	0.0358	0.11	0.536	1.09
F0736	N	normal fault, 31-32N, 108W, NM	C	Dickinson, 1979			30-15	5-1	0.00166	0.0285	0.0331	0.0868	0.314	1.17
F0736	N	normal fault, 31-32N, 108W, NM	S	combined offset rate (1 GCN data)					0.00101	2.29E-6	0.0358	0.11	0.536	1.09
F0740	N	normal fault, 31N, 107-108W, Chih.-NM	C	Dickinson, 1979			30-15	5-1	0.00166	0.0285	0.0331	0.0868	0.314	1.17
F0740	N	normal fault, 31N, 107-108W, Chih.-NM	C	Keller et al., 1990			30	15	2.3E-6	3.58E-7	0.0000628	0.0000906	0.000334	0.0000904
F0740	N	normal fault, 31N, 107-108W, Chih.-NM	S	combined offset rate (2 GCN data)					4.97E-6	2.29E-6	0.0000819	0.0161	0.0913	0.417
F0737	N	normal fault, 31N, 108W, NM	C	Dickinson, 1979			30-15	5-1	0.00166	0.0285	0.0331	0.0868	0.314	1.17
F0737	N	normal fault, 31N, 108W, NM	C	Keller et al., 1990			10	3	0.0000115	1.37E-6	0.000317	0.000466	0.00176	0.00048
F0737	N	normal fault, 31N, 108W, NM	S	combined offset rate (2 GCN data)					0.0000157	2.29E-6	0.000403	0.0164	0.091	0.416
F1558	N	normal fault, 31N, 108W, NM	C	Keller et al., 1990			30	15	2.3E-6	3.58E-7	0.0000628	0.0000906	0.000334	0.0000904
F1558	N	normal fault, 31N, 108W, NM	S	combined offset rate (1 GCN data)					2.77E-6	2.39E-7	0.0000795	0.0364	0.399	0.157
F0738	N	normal fault, 32-33N, 107-108W, NM	C	Dickinson, 1979			30-15	5-1	0.00166	0.0285	0.0331	0.0868	0.314	1.17
F0738	N	normal fault, 32-33N, 107-108W, NM	C	Keller et al., 1990			10	3	0.0000115	1.37E-6	0.000317	0.000466	0.00176	0.00048
F0738	N	normal fault, 32-33N, 107-108W, NM	S	combined offset rate (2 GCN data)					0.0000157	2.29E-6	0.000403	0.0164	0.091	0.416
F0748	N	normal fault, 32N, 105W, NM	B	Seager et al., 1984			9	3	0.0000115	1.37E-6	0.000317	0.000466	0.00176	0.00048
F0748	N	normal fault, 32N, 105W, NM	S	combined offset rate (1 GCN data)					0.0000127	8.16E-8	0.000364	0.0239	0.332	0.128
F0739	N	normal fault, 32N, 107W, NM	S	combined offset rate (0 GCN data)					0.000304	0.00102	0.183	0.25	1.09	0.343
F0742	N	normal fault, 32N, 107W, NM	C	Dickinson, 1979			30-15	5-1	0.00166	0.0285	0.0331	0.0868	0.314	1.17
F0742	N	normal fault, 32N, 107W, NM	B	Seager et al., 1984			9	3	0.0000115	1.37E-6	0.000317	0.000466	0.00176	0.00048
F0742	N	normal fault, 32N, 107W, NM	S	combined offset rate (2 GCN data)					0.0000149	2.29E-6	0.000369	0.0108	0.0534	0.335
F0743	N	normal fault, 32N, 107W, NM	C	Dickinson, 1979			30-15	5-1	0.00166	0.0285	0.0331	0.0868	0.314	1.17
F0743	N	normal fault, 32N, 107W, NM	B	Seager et al., 1984			9	3	0.0000115	1.37E-6	0.000317	0.000466	0.00176	0.00048
F0743	N	normal fault, 32N, 107W, NM	C	Stewart, 1998			10	7	4.92E-6	9.14E-7	0.000135	0.000195	0.000722	0.000195
F0743	N	normal fault, 32N, 107W, NM	S	combined offset rate (3 GCN data)					6.22E-6	2.29E-6	0.000114	0.00169	0.00115	0.128
F0734	N	normal fault, 32N, 108W, NM	C	Dickinson, 1979			30-15	5-1	0.00166	0.0285	0.0331	0.0868	0.314	1.17
F0734	N	normal fault, 32N, 108W, NM	C	Keller et al., 1990			10	3	0.0000115	1.37E-6	0.000317	0.000466	0.00176	0.00048
F0734	N	normal fault, 32N, 108W, NM	S	combined offset rate (2 GCN data)					0.0000157	2.29E-6	0.000403	0.0164	0.091	0.416
F1559	N	normal fault, 33-32N, 108-107W, NM	C	Keller et al., 1990			30	15	2.3E-6	3.58E-7	0.0000628	0.0000906	0.000334	0.0000904
F1559	N	normal fault, 33-32N, 108-107W, NM	C	Christiansen and Yeats, 1992	2-4		21-10		0.101	0.171	0.202	0.277	0.72	1.21
F1559	N	normal fault, 33-32N, 108-107W, NM	S	combined offset rate (2 GCN data)					5.32E-6	2.29E-6	0.0001	0.0644	0.449	0.44
F0751	N	normal fault, 33-34N, 106W, NM	S	combined offset rate (0 GCN data)					0.000304	0.00102	0.183	0.25	1.09	0.343
F0750	N	normal fault, 33N, 106W, NM	S	combined offset rate (0 GCN data)					0.000304	0.00102	0.183	0.25	1.09	0.343
F0741	N	normal fault, 33N, 107W, NM	C	Dickinson, 1979			30-15	5-1	0.00166	0.0285	0.0331	0.0868	0.314	1.17
F0741	N	normal fault, 33N, 107W, NM	B	Seager et al., 1984			9	3	0.0000115	1.37E-6	0.000317	0.000466	0.00176	0.00048
F0741	N	normal fault, 33N, 107W, NM	S	combined offset rate (2 GCN data)					0.0000149	2.29E-6	0.000369	0.0108	0.0534	0.335
F0733	N	normal fault, 33N, 108W, NM	C	Dickinson, 1979			30-15	5-1	0.00166	0.0285	0.0331	0.0868	0.314	1.17
F0733	N	normal fault, 33N, 108W, NM	C	Keller et al., 1990			10	3	0.0000115	1.37E-6	0.000317	0.000466	0.00176	0.00048
F0733	N	normal fault, 33N, 108W, NM	S	combined offset rate (2 GCN data)					0.0000157	2.29E-6	0.000403	0.0164	0.091	0.416
F0731	N	normal fault, 33N, 109-108W, AZ-NM	C	Dickinson, 1979			30-15	5-1	0.00166	0.0285	0.0331	0.0868	0.314	1.17
F0731	N	normal fault, 33N, 109-108W, AZ-NM	S	combined offset rate (1 GCN data)					0.00101	2.29E-6	0.0358	0.11	0.536	1.09
F1260	N	normal faults W of Espanola basin, NM	B	Ingersoll et al., 1990			~15	~8	4.3E-6	7.65E-7	0.000118	0.00017	0.00063	0.00017
F1260	N	normal faults W of Espanola basin, NM	C	Christiansen and Yeats, 1992	~6		<13	3	0.0000115	1.37E-6	0.000317	0.000466	0.00176	0.00048
F1260	N	normal faults W of Espanola basin, NM	C	Stewart, 1998			8	3	0.0000115	1.37E-6	0.000317	0.000466	0.00176	0.00048
F1260	N	normal faults W of Espanola basin, NM	C	USGS Quaternary Fault & Fold Database, 2005.01	.09-.12		2.8-2.2	0	0.0328	0.0414	0.042	0.0422	0.0528	0.00512
F1260	N	normal faults W of Espanola basin, NM	S	combined offset rate (1* GCN data)					0.00302	0.0415	0.0425	0.0724	0.399	0.15
F2381	N	Pajarito normal fault, NM	C	USGS Quaternary Fault & Fold Database, 2005.01	0.081		1.2	0	0.0615	0.0673	0.0675	0.0676	0.0744	0.00328
F2381	N	Pajarito normal fault, NM	S	combined offset rate (1 GCN data)					0.00302	0.0672	0.0677	0.0941	0.399	0.145
F2380	N	Picuris-Pecos normal fault, NM	S	combined offset rate (0 GCN data)					0.000304	0.00102	0.183	0.25	1.09	0.343
F0754	N	Pojoaque normal fault, NM	C	Christiansen and Yeats, 1992	~6		<13	3	0.0000115	1.37E-6	0.000317	0.000466	0.00176	0.00048
F0754	N	Pojoaque normal fault, NM	C	Stewart, 1998			8	3	0.0000115	1.37E-6	0.000317	0.000466	0.00176	0.00048
F0754	N	Pojoaque normal fault, NM	S	combined offset rate (2 GCN data)					6.73E-6	8.16E-8	0.000189	0.00555	0.00174	0.0613
F1255	N	Puertecito normal fault, NM [see also F1254T]	A	Cather, 1990			36	32	1.08E-6	1.56E-7	0.0000294	0.0000424	0.000157	0.0000423
F1255	N	Puertecito normal fault, NM [see also F1254T]	S	combined offset rate (1 GCN data)					1.21E-6	1.04E-7	0.0000315	0.0108	0.117	0.0874
F2382	N	Puye normal fault, NM	S	combined offset rate (0 GCN data)					0.000304	0.00102	0.183	0.25	1.09	0.343
F1259	N	Red Lake normal fault, NM [see also F1258T]	A	Cather, 1990	0.25		36	32	1.08E-6	1.56E-7	0.0000294	0.0000424	0.000157	0.0000423
F1259	N	Red Lake normal fault, NM [see also F1258T]	S	combined offset rate (1 GCN data)					1.21E-6	1.04E-7	0.0000315	0.0108	0.117	0.0874
F0371	N	S Sangre de Cristo normal fault, NM [see F0460N,	C	Christiansen and Yeats, 1992	~6		<13	3	0.0000115	1.37E-6	0.000317	0.000466	0.00176	0.00048
F0371	N	S Sangre de Cristo normal fault, NM [see F0460N,	C	USGS Quat. Fault & Fold Datab., 2005.01 (2017edca	0.48-0.92		4	0	0.0992	0.17	0.175	0.178	0.273	0.0442
F0371	N	S Sangre de Cristo normal fault, NM [see F0460N,	C	USGS Quat. Fault & Fold Datab., 2005.01 (2017b)	0.6		4.5-3.6	0	0.12	0.146	0.148	0.149	0.181	0.0158
F0371	N	S Sangre de Cristo normal fault, NM [see F0460N,	S	combined offset rate (3* GCN data)					0.0000559	8.16E-8	0.146	0.126	0.244	0.0967
F0746	N	San Andres-Organ Mountains normal fault, NM	B	Seager et al., 1984			9	3	0.0000115	1.37E-6	0.000317	0.000466	0.00176	0.00048
F0746	N	San Andres-Organ Mountains normal fault, NM	C	Keller et al., 1990			10	3	0.0000115	1.37E-6	0.000317	0.000466	0.00176	0.00048
F0746	N	San Andres-Organ Mountains normal fault, NM	C	USGS Quaternary Fault & Fold Database, 2005.01(20	.025-.05		0.4-0.25	0	0.0585	0.108	0.113	0.116	0.185	0.0324
F0746	N	San Andres-Organ Mountains normal fault, NM	C	USGS Quaternary Fault & Fold Database, 2005.01(20	.006-.015		0.13-0.07	0	0.0355	0.0982	0.105	0.109	0.203	0.0422
F0746	N	San Andres-Organ Mountains normal fault, NM	S	combined offset rate (2* GCN data)					0.0553	0.104	0.108	0.113	0.182	0.0607
F2383	N	San Francisco normal fault, NM	C	USGS Quaternary Fault & Fold Database, 2005.01	0.2?		1.59-1.22	0	0.0718	0.141	0.142	0.143	0.219	0.0375
F2383	N	San Francisco normal fault, NM	S	combined offset rate (1 GCN data)					0.00302	0.00203	0.143	0.159	0.399	0.14
F0752	N	Santa Fe normal fault, NM	A	Callender and Zilinski, 1976	2.7-3.5		<27.1		0.112	0.129	0.229	0.869	4.49	5.03
F0752	N	Santa Fe normal fault, NM	B	Chamberlin, 1983a	0.3		7-4		0.0332	0.0504	0.0545	0.0565	0.0901	0.0146
F0752	N	Santa Fe normal fault, NM	S	combined offset rate (2 GCN data)					0.0129	0.108	0.0984	0.193	0.715	1.72
F1358	N	Tijeras-Canoncito normal(?) fault, NM	S	combined offset rate (0 GCN data)					0.000304	0.00102	0.183	0.25	1.09	0.343
F1358	L	Tijeras-Canoncito sinistral f. s., NM [F0869R]	A	Lisenbee et al., 1979	0.4-0.6		37		0.00997	0.0135	0.0135	0.0135	0.0171	0.00181
F1358	L	Tijeras-Canoncito sinistral f. s., NM [F0869R]	S	combined offset rate (1 GCN data)					0.00681	0.0135	0.0167	2.27	13.8	3.94
F0749	N	West Delaware Mountains normal fault, TX-NM	B	Seager et al., 1984			9	3	0.0000115	1.37E-6	0.000317	0.000466	0.00176	0.00048
F0749	N	West Delaware Mountains normal fault, TX-NM	C	Keller et al., 1990			10	3	0.0000115	1.37E-6	0.000317	0.000466	0.00176	0.00048
F0749	N	West Delaware Mountains normal fault, TX-NM	C	Christiansen and Yeats, 1992			28-23	17	2.02E-6	3.1E-7	0.0000554	0.0000799	0.000295	0.0000797
F0749	N	West Delaware Mountains normal fault, TX-NM	S	combined offset rate (3 GCN data)					1.82E-6	2.08E-7	0.0000493	0.000587	0.000499	0.0189
F1261	N	West Mesa-Zia-County Dump normal fault, NM	B	Ingersoll et al., 1990			~21	~5	6.89E-6	1.5E-6	0.000189	0.000274	0.00102	0.000276
F1261	N	West Mesa-Zia-County Dump normal fault, NM	C	Christiansen and Yeats, 1992	~6		<13	3	0.0000115	1.37E-6	0.000317	0.000466	0.00176	0.00048
F1261	N	West Mesa-Zia-County Dump normal fault, NM	C	USGS Quat. Fault & Fold Datab., 2005.01 (2038)	0.02		0.527	0	0.0182	0.0382	0.0382	0.0383	0.0584	0.0102
F1261	N	West Mesa-Zia-County Dump normal fault, NM	C	USGS Quat. Fault & Fold Datab., 2005.01 (2046)	~0.06?		~1.6?	0	0.0307	0.0374	0.0375	0.0375	0.0446	0.00355
F1261	N	West Mesa-Zia-County Dump normal fault, NM	S	combined offset rate (2* GCN data)					0.0277	0.0375	0.0376	0.0421	0.0524	0.0585
F0619	N	Antelope Range-Kingsley Mt. normal fault, NV	C	Stewart, 1978	2-5		13-11		0.128	0.289	0.292	0.293	0.465	0.0857
F0619	N	Antelope Range-Kingsley Mt. normal fault, NV	S	combined offset rate (1 GCN data)					0.000638	0.00198	0.268	0.273	0.731	0.245
F1915	N	Bare Mountain normal fault, NV	S	combined offset rate (0 GCN data)					0.000304	0.00102	0.183	0.25	1.09	0.343
F2096	N	Battle Mountain normal fault, NV	S	combined offset rate (0 GCN data)					0.000304	0.00102	0.183	0.25	1.09	0.343
F2097	R	Benton Springs dextral fault, NV [F2194N]	C	Haller et al., 2002 (1320) (estimated dextral rat	0.0076		0.1-0.06	0	0.0143	0.0663	0.0795	0.0867	0.201	0.0474
F2097	R	Benton Springs dextral fault, NV [F2194N]	S	combined offset rate (1 GCN data)					0.015	0.0662	0.0879	1.76	23.9	6.27
F2194	N	Benton Springs normal fault, NV [F2097R]	C	USGS Quaternary Fault & Fold Database, 2005.01	0.0076		0.1-0.06	0	0.0313	0.0681	0.0791	0.0827	0.153	0.0318
F2194	N	Benton Springs normal fault, NV [F2097R]	S	combined offset rate (1 GCN data)					0.00256	0.00197	0.0809	0.107	0.399	0.146
F1660	N	Beowawe normal fault, NV	S	combined offset rate (0 GCN data)					0.000304	0.00102	0.183	0.25	1.09	0.343
F2098	R	Bettles Well-Petrified Springs dextral fault, NV	S	combined offset rate (0 GCN data)					0.0381	0.00713	6.18	11.6	42.8	12.6
F2099	N	Black Hills normal fault, NV	S	combined offset rate (0 GCN data)					0.000304	0.00102	0.183	0.25	1.09	0.343
F2100	N	Black Rock normal fault, NV	C	Haller et al., 2002 (1485)	0.004		.025-.014	0	0.0464	0.198	0.211	0.218	0.429	0.0934
F2100	N	Black Rock normal fault, NV	S	combined offset rate (1 GCN data)					0.00207	0.0019	0.21	0.223	0.486	0.157
F2101	N	Bloody Run Hills normal fault, NV	S	combined offset rate (0 GCN data)					0.000304	0.00102	0.183	0.25	1.09	0.343
F2179	N	Bonham Ranch normal fault, NV	C	Stewart, 1978	2-5		12.5-8		0.147	0.33	0.342	0.349	0.586	0.111
F2179	N	Bonham Ranch normal fault, NV	C	Haller et al., 2002 (1601; name: Bonham Ranch fau	0.0035		.012-.005	0	0.0926	0.362	0.431	0.459	0.941	0.209
F2179	N	Bonham Ranch normal fault, NV	S	combined offset rate (2 GCN data)					0.0553	0.00177	0.373	0.393	0.809	0.179
F2102	N	Buena Vista Valley normal fault, NV	C	Stewart, 1978	2-5		12.5-8		0.147	0.33	0.342	0.349	0.586	0.111
F2102	N	Buena Vista Valley normal fault, NV	S	combined offset rate (1 GCN data)					0.000693	0.00177	0.304	0.305	0.715	0.247
F2120	N	Buffalo Creek-E. Edwards Crk Vly n.f., NV	S	combined offset rate (0 GCN data)					0.000304	0.00102	0.183	0.25	1.09	0.343
F2103	N	Buffalo Mountain normal fault, NV	S	combined offset rate (0 GCN data)					0.000304	0.00102	0.183	0.25	1.09	0.343
F0908	N	Buffalo Valley normal fault, NV	C	Stewart, 1978	2-5		13-11		0.128	0.289	0.292	0.293	0.465	0.0857
F0908	N	Buffalo Valley normal fault, NV	C	Stewart, 1998 (scarp height only)	>(0.3-2)		<23.8	0	0.0405	0.142	0.36	1.45	8.49	6.93
F0908	N	Buffalo Valley normal fault, NV	S	combined offset rate (2 GCN data)					0.00102	0.00198	0.275	0.483	1.75	2.98
F0634	N	Butte Mountains normal fault, NV	C	Stewart, 1978	2-5		13-11		0.128	0.289	0.292	0.293	0.465	0.0857
F0634	N	Butte Mountains normal fault, NV	S	combined offset rate (1 GCN data)					0.000638	0.00198	0.268	0.273	0.731	0.245
F2104	N	California Wash normal fault, NV	S	combined offset rate (0 GCN data)					0.000304	0.00102	0.183	0.25	1.09	0.343
F2105	N	Carico Lake Valley normal fault, NV	S	combined offset rate (0 GCN data)					0.000304	0.00102	0.183	0.25	1.09	0.343
F2178	N	Carico Lake Valley normal fault, NV	S	combined offset rate (0 GCN data)					0.000304	0.00102	0.183	0.25	1.09	0.343
F2106	N	Carson City normal fault, NV	S	combined offset rate (0 GCN data)					0.000304	0.00102	0.183	0.25	1.09	0.343
F2107	N	Carson Range normal fault, NV	S	combined offset rate (0 GCN data)					0.000304	0.00102	0.183	0.25	1.09	0.343
F0669	N	Clan Alpine normal fault, NV	C	Stewart, 1978	2-5		12.5-8		0.147	0.33	0.342	0.349	0.586	0.111
F0669	N	Clan Alpine normal fault, NV	C	dePolo, 1998	0.0194		0.13?	0	0.13	0.159	0.176	0.242	0.544	1.24
F0669	N	Clan Alpine normal fault, NV	C	USGS Quaternary Fault & Fold Database, 2005.01	.003-.004		0.13?	0	0.00152	0.0285	0.0304	0.0381	0.101	0.41
F0669	N	Clan Alpine normal fault, NV	S	combined offset rate (3 GCN data)					0.0193	0.164	0.164	0.173	0.351	0.315
F2110	L	Coaldale sinistral(?) fault 1, NV	S	combined offset rate (0 GCN data)					0.00356	0.00356	2.23	4.33	15.4	4.56
F2111	L	Coaldale sinistral(?) fault 2, NV	S	combined offset rate (0 GCN data)					0.00356	0.00356	2.23	4.33	15.4	4.56
F0511	N	Cortez Mountain normal fault, NV	C	Loring, 1976			16.6	1.6	0.0000215	5.54E-6	0.000588	0.000848	0.00313	0.000846
F0511	N	Cortez Mountain normal fault, NV	C	Stewart, 1978	2-5		13-11		0.128	0.289	0.292	0.293	0.465	0.0857
F0511	N	Cortez Mountain normal fault, NV	C	Stewart, 1998 (scarp height only)	>(0.3-2)		<23.8	0	0.0405	0.142	0.36	1.45	8.49	6.93
F0511	N	Cortez Mountain normal fault, NV	S	combined offset rate (3 GCN data)					0.0000309	4.44E-6	0.000783	0.0709	0.407	1.15
F2173	N	Coyote Spring normal fault, NV	S	combined offset rate (0 GCN data)					0.000304	0.00102	0.183	0.25	1.09	0.343
F0656	N	Crescent Dunes-Liberty normal fault, NV	C	Stewart, 1978	2-5		12.5-8		0.147	0.33	0.342	0.349	0.586	0.111
F0656	N	Crescent Dunes-Liberty normal fault, NV	S	combined offset rate (1 GCN data)					0.000693	0.00177	0.304	0.305	0.715	0.247
F2113	N	Desatoya Mountains normal fault, NV	S	combined offset rate (0 GCN data)					0.000304	0.00102	0.183	0.25	1.09	0.343
F2275	R	dextral(?) fault, 36N, 116W, NV	S	combined offset rate (0 GCN data)					0.0381	0.00713	6.18	11.6	42.8	12.6
F2114	N	Diamond Mountains normal fault, NV	S	combined offset rate (0 GCN data)					0.000304	0.00102	0.183	0.25	1.09	0.343
F0641	N	Diamond Valley normal fault, NV	C	Stewart, 1978	2-5		13-11		0.128	0.289	0.292	0.293	0.465	0.0857
F0641	N	Diamond Valley normal fault, NV	C	Stewart, 1998 (scarp height only)	>(0.3-2)		<23.8	0	0.0405	0.142	0.36	1.45	8.49	6.93
F0641	N	Diamond Valley normal fault, NV	S	combined offset rate (2 GCN data)					0.00102	0.00198	0.275	0.483	1.75	2.98
F0524	N	Dixie Valley normal fault, NV	C	Stewart, 1978	2-5		12.5-8		0.147	0.33	0.342	0.349	0.586	0.111
F0524	N	Dixie Valley normal fault, NV	A	Parry et al., 1991 (phase 2)	3		10	0	0.135	0.218	0.296	0.544	1.84	2.76
F0524	N	Dixie Valley normal fault, NV	A	Parry et al., 1991 (total slip)	6		25	0	0.2	0.24	0.24	0.24	0.281	0.0206
F0524	N	Dixie Valley normal fault, NV	C	Stewart, 1998 (scarp height only)	>(0.3-2)		13	0	0.0605	0.295	0.304	0.381	1.39	0.374
F0524	N	Dixie Valley normal fault, NV	C	dePolo, 1998	0.031		0.5-0.2		0.0566	0.0711	0.0886	0.0978	0.188	0.0365
F0524	N	Dixie Valley normal fault, NV	C	USGS Quaternary Fault & Fold Database, 2005.01	3.48?		12.9-10.4	0	0.271	0.273	0.299	0.3	0.333	0.0187
F0524	N	Dixie Valley normal fault, NV	S	combined offset rate (6 GCN data)					0.269	0.272	0.275	0.277	0.296	0.00796
F1569	N	Dry Lake normal fault, NV	A	Taylor, 1990 [Dry Lake Vly f.; thickness of fill	>0.76		<~3		0.281	0.394	0.868	2.91	18	10.1
F1569	N	Dry Lake normal fault, NV	C	dePolo, 1998	0.004		0.55	0	0.00155	0.00732	0.00742	0.00761	0.015	0.00325
F1569	N	Dry Lake normal fault, NV	S	combined offset rate (2 GCN data)					0.0036	0.00733	0.616	2.23	14	8.94
F2115	N	Dry Valley-Smoke Creek Ranch n.f., NV	S	combined offset rate (0 GCN data)					0.000304	0.00102	0.183	0.25	1.09	0.343
F2116	N	Duck Flat normal fault, NV	S	combined offset rate (0 GCN data)					0.000304	0.00102	0.183	0.25	1.09	0.343
F2117	N	Dun Glen normal fault, NV	S	combined offset rate (0 GCN data)					0.000304	0.00102	0.183	0.25	1.09	0.343
F2119	N	Eastern Bilk Creek Mountains normal fault, NV	S	combined offset rate (0 GCN data)					0.000304	0.00102	0.183	0.25	1.09	0.343
F2121	N	Eastern Edwards Creek Valley n. f., NV	S	combined offset rate (0 GCN data)					0.000304	0.00102	0.183	0.25	1.09	0.343
F2122	N	Eastern Granite Range normal fault, NV	C	Stewart, 1978	2-5		12.5-8		0.147	0.33	0.342	0.349	0.586	0.111
F2122	N	Eastern Granite Range normal fault, NV	S	combined offset rate (1 GCN data)					0.000693	0.00177	0.304	0.305	0.715	0.247
F2123	N	Eastern Independence Valley normal fault, NV	S	combined offset rate (0 GCN data)					0.000304	0.00102	0.183	0.25	1.09	0.343
F0648	N	Eastern Monitor Range normal fault, NV	C	Stewart, 1978	2-5		13-11		0.128	0.289	0.292	0.293	0.465	0.0857
F0648	N	Eastern Monitor Range normal fault, NV	C	Stewart, 1998 (scarp height only)	>(0.3-2)		<23.8	0	0.0405	0.142	0.36	1.45	8.49	6.93
F0648	N	Eastern Monitor Range normal fault, NV	S	combined offset rate (2 GCN data)					0.00102	0.00198	0.275	0.483	1.75	2.98
F2124	N	Eastern Osgood Mountains normal fault, NV	S	combined offset rate (0 GCN data)					0.000304	0.00102	0.183	0.25	1.09	0.343
F1916	N	Eastern Osgood Mountains Piedmont n.f., NV	C	Stewart, 1998 (scarp height only)	>(0.3-2)		<23.8	0	0.0405	0.142	0.36	1.45	8.49	6.93
F1916	N	Eastern Osgood Mountains Piedmont n.f., NV	S	combined offset rate (1 GCN data)					0.000487	2.29E-6	0.247	0.701	3.37	4.3
F2155	N	Eastern Pine Forest Range normal f. zone, NV	S	combined offset rate (0 GCN data)					0.000304	0.00102	0.183	0.25	1.09	0.343
F2125	N	Eastern Pyramid Lake normal fault, NV	S	combined offset rate (0 GCN data)					0.000304	0.00102	0.183	0.25	1.09	0.343
F0637	N	Eastern Tuscarora Mountains normal fault, NV	C	Stewart, 1978	2-5		13-11		0.128	0.289	0.292	0.293	0.465	0.0857
F0637	N	Eastern Tuscarora Mountains normal fault, NV	C	Stewart, 1998 (scarp height only)	>(0.3-2)		10	0	0.0573	0.199	0.338	0.758	3.37	3.42
F0637	N	Eastern Tuscarora Mountains normal fault, NV	S	combined offset rate (2 GCN data)					0.00147	0.00198	0.28	0.405	1.46	1.8
F2164	N	Edna Mountain normal fault, NV	S	combined offset rate (0 GCN data)					0.000304	0.00102	0.183	0.25	1.09	0.343
F2126	N	Eglington normal fault, NV	C	USGS Quaternary Fault & Fold Database, 2005.01				.04-.013	0.00112	0.000703	0.0302	0.0475	0.195	0.0535
F2126	N	Eglington normal fault, NV	S	combined offset rate (1 GCN data)					0.000814	0.000564	0.0341	0.0769	0.406	0.157
F0525	N	Emigrant Peak normal fault, NV	C	Stewart, 1978	2-5		12.5-8		0.147	0.33	0.342	0.349	0.586	0.111
F0525	N	Emigrant Peak normal fault, NV	C	Haller et al., 2002 (1329)	0.038		0.05?	0	0.684	0.824	1.04	2.19	9.74	7.15
F0525	N	Emigrant Peak normal fault, NV	S	combined offset rate (2 GCN data)					0.0909	0.00177	0.722	1.2	4.16	4.45
F2127	N	Eugene Mountains normal fault, NV	C	Stewart, 1998 (scarp height only)	>(0.3-2)		23.8-8	0	0.0509	0.171	0.29	0.411	1.6	0.48
F2127	N	Eugene Mountains normal fault, NV	S	combined offset rate (1 GCN data)					0.000559	3.19E-7	0.243	0.324	1.35	0.419
F2128	N	Fairview normal fault zone, NV	C	USGS Quaternary Fault & Fold Database, 2005.01	0.005		0.1-0.035	0	0.0155	0.0454	0.0636	0.0724	0.171	0.041
F2128	N	Fairview normal fault zone, NV	S	combined offset rate (1 GCN data)					0.00197	0.0019	0.0664	0.0981	0.399	0.15
F2129	N	Fox Range normal fault, NV	S	combined offset rate (0 GCN data)					0.000304	0.00102	0.183	0.25	1.09	0.343
F2130	N	Freds Mountain normal fault, NV	S	combined offset rate (0 GCN data)					0.000304	0.00102	0.183	0.25	1.09	0.343
F2288	N	Frenchman Mountain normal fault, NV	C	dePolo, 1998	0.0075		0.5	0	0.00709	0.0149	0.0153	0.0155	0.0248	0.00426
F2288	N	Frenchman Mountain normal fault, NV	S	combined offset rate (1 GCN data)					0.00195	0.0149	0.0157	0.0495	0.399	0.154
F2109	N	Golden Gate-Coal Valley n. f., NV	S	combined offset rate (0 GCN data)					0.000304	0.00102	0.183	0.25	1.09	0.343
F0664	N	Granite Springs Valley normal fault, NV	C	Stewart, 1978	2-5		12.5-8		0.147	0.33	0.342	0.349	0.586	0.111
F0664	N	Granite Springs Valley normal fault, NV	C	Cole and Armentrout, 1979				>5.3	2.69E-6	3.06E-7	0.0000817	0.000135	0.000576	0.000158
F0664	N	Granite Springs Valley normal fault, NV	S	combined offset rate (2 GCN data)					3.3E-6	8.16E-8	0.00011	0.0445	0.439	0.143
F2132	N	Grass Valley normal fault, NV	S	combined offset rate (0 GCN data)					0.000304	0.00102	0.183	0.25	1.09	0.343
F2112	N	Hiko-Crystal Springs normal fault, NV	S	combined offset rate (0 GCN data)					0.000304	0.00102	0.183	0.25	1.09	0.343
F2225	R	Honey Lake dextral fault, NV [F2053R in CA]	C	USGS Quaternary Fault & Fold Database, 2005.01(22	.014-.018		.0125-.007	0	0.733	1.52	1.65	1.7	2.87	0.532
F2225	R	Honey Lake dextral fault, NV [F2053R in CA]	S	combined offset rate (1 GCN data)					0.471	1.51	1.69	3.13	23.9	5.94
F0677	N	Hoppin Peaks normal fault, NV	C	Stewart, 1978	2-5		12.5-8		0.147	0.33	0.342	0.349	0.586	0.111
F0677	N	Hoppin Peaks normal fault, NV	C	USGS Quaternary Fault & Fold Database, 2005.01	1.85-3.1		17-15?		0.103	0.154	0.155	0.155	0.209	0.0271
F0677	N	Hoppin Peaks normal fault, NV	S	combined offset rate (2 GCN data)					0.00127	0.00177	0.185	0.24	0.587	0.196
F2133	N	Hot Springs normal fault, NV	S	combined offset rate (0 GCN data)					0.000304	0.00102	0.183	0.25	1.09	0.343
F2138	N	Independence Valley normal fault zone, NV	S	combined offset rate (0 GCN data)					0.000304	0.00102	0.183	0.25	1.09	0.343
F2140	N	Indian Head normal fault, NV	S	combined offset rate (0 GCN data)					0.000304	0.00102	0.183	0.25	1.09	0.343
F0670	N	Ione Valley normal fault, NV	C	Stewart, 1978	2-5		12.5-8		0.147	0.33	0.342	0.349	0.586	0.111
F0670	N	Ione Valley normal fault, NV	C	Stewart, 1998 (scarp height only)	>(0.3-2)		13	0	0.0605	0.295	0.304	0.381	1.39	0.374
F0670	N	Ione Valley normal fault, NV	S	combined offset rate (2 GCN data)					0.0014	0.00177	0.309	0.326	0.826	0.253
F0678	N	Jackson Mountains normal fault zone, NV	C	Stewart, 1978	2-5		12.5-8		0.147	0.33	0.342	0.349	0.586	0.111
F0678	N	Jackson Mountains normal fault zone, NV	C	Stewart, 1998 (scarp height only)	>(0.3-2)		<23.8	0	0.0405	0.142	0.36	1.45	8.49	6.93
F0678	N	Jackson Mountains normal fault zone, NV	S	combined offset rate (2 GCN data)					0.00111	0.00177	0.309	0.496	1.63	2.86
F2141	N	Jakes Valley normal fault, NV	S	combined offset rate (0 GCN data)					0.000304	0.00102	0.183	0.25	1.09	0.343
F2142	N	Jersey Valley normal fault 1, NV	S	combined offset rate (0 GCN data)					0.000304	0.00102	0.183	0.25	1.09	0.343
F2143	N	Jersey Valley normal fault 2, NV	S	combined offset rate (0 GCN data)					0.000304	0.00102	0.183	0.25	1.09	0.343
F2144	L	Kane Springs Wash sinistral fault, NV	C	USGS Quaternary Fault & Fold Database, 2005.01	4.5		14	0	0.299	0.321	0.321	0.322	0.347	0.0121
F2144	L	Kane Springs Wash sinistral fault, NV	S	combined offset rate (1 GCN data)					0.00693	0.321	0.336	2.38	13.7	3.83
F0649	N	Kawich-Hot Creek Range normal fault, NV	C	Stewart, 1978	2-5		13-11		0.128	0.289	0.292	0.293	0.465	0.0857
F0649	N	Kawich-Hot Creek Range normal fault, NV	C	Stewart, 1998 (scarp height only)	>(0.3-2)		<23.8	0	0.0405	0.142	0.36	1.45	8.49	6.93
F0649	N	Kawich-Hot Creek Range normal fault, NV	S	combined offset rate (2 GCN data)					0.00102	0.00198	0.275	0.483	1.75	2.98
F2389	N	Kings Canyon normal fault zone, NV	S	combined offset rate (0 GCN data)					0.000304	0.00102	0.183	0.25	1.09	0.343
F2145	N	Little Fish Lake Valley normal fault, NV	S	combined offset rate (0 GCN data)					0.000304	0.00102	0.183	0.25	1.09	0.343
F2151	N	Little Valley normal fault, NV	S	combined offset rate (0 GCN data)					0.000304	0.00102	0.183	0.25	1.09	0.343
F0655	N	Lone Mountain normal fault, NV	C	Stewart, 1978	2-5		12.5-8		0.147	0.33	0.342	0.349	0.586	0.111
F0655	N	Lone Mountain normal fault, NV	C	dePolo, 1998	.0029		0.0225?	0	0.0204	0.13	0.133	0.141	0.309	0.0699
F0655	N	Lone Mountain normal fault, NV	C	Haller et al., 2002 (1338)	.0029		0.0225?	0	0.0204	0.13	0.133	0.141	0.309	0.0699
F0655	N	Lone Mountain normal fault, NV	S	combined offset rate (3 GCN data)					0.054	0.131	0.147	0.161	0.321	0.0716
F2146	N	Marys Mountain normal fault, NV	S	combined offset rate (0 GCN data)					0.000304	0.00102	0.183	0.25	1.09	0.343
F2147	N	McGee Mountain normal fault, NV	S	combined offset rate (0 GCN data)					0.000304	0.00102	0.183	0.25	1.09	0.343
F2108	N	Middlegate-Clan Alpine Mountains n. f., NV	S	combined offset rate (0 GCN data)					0.000304	0.00102	0.183	0.25	1.09	0.343
F2183	N	Montana Mountains normal fault 2, NV	C	Stewart, 1978	2-5		13-11		0.128	0.289	0.292	0.293	0.465	0.0857
F2183	N	Montana Mountains normal fault 2, NV	C	Stewart, 1998 (scarp height only)	0.6-1.5		15	5	6.89E-6	1.5E-6	0.000189	0.000274	0.00102	0.000276
F2183	N	Montana Mountains normal fault 2, NV	S	combined offset rate (2 GCN data)					8.78E-6	9.99E-7	0.000261	0.0398	0.381	0.134
F2148	N	Montana Mountains-Desert Valley n. f., NV	C	Stewart, 1978	2-5		13-11		0.128	0.289	0.292	0.293	0.465	0.0857
F2148	N	Montana Mountains-Desert Valley n. f., NV	C	Stewart, 1998 (Montana Mts fault; scarp height on	0.6-1.5		15	5	6.89E-6	1.5E-6	0.000189	0.000274	0.00102	0.000276
F2148	N	Montana Mountains-Desert Valley n. f., NV	S	combined offset rate (2 GCN data)					8.78E-6	9.99E-7	0.000261	0.0398	0.381	0.134
F2149	R	Monte Cristo Valley dextral fault, NV	C	USGS Quaternary Fault & Fold Database, 2005.01	.006-.012		.035-.025	0	0.0602	0.295	0.305	0.314	0.629	0.141
F2149	R	Monte Cristo Valley dextral fault, NV	S	combined offset rate (1 GCN data)					0.058	0.296	0.327	1.95	23.9	6.22
F2152	N	Mount Irish Range normal fault, NV	S	combined offset rate (0 GCN data)					0.000304	0.00102	0.183	0.25	1.09	0.343
F2150	N	Mount Rose normal fault, NV	S	combined offset rate (0 GCN data)					0.000304	0.00102	0.183	0.25	1.09	0.343
F2168	N	Nightingale Mountains normal fault, NV	C	Stewart, 1978	2-5		12.5-8		0.147	0.33	0.342	0.349	0.586	0.111
F2168	N	Nightingale Mountains normal fault, NV	C	Stewart, 1998			12	5	6.89E-6	1.5E-6	0.000189	0.000274	0.00102	0.000276
F2168	N	Nightingale Mountains normal fault, NV	S	combined offset rate (2 GCN data)					8.62E-6	9.99E-7	0.000263	0.0446	0.438	0.143
F0631	N	normal f E of Quinn Cyn Rng, 37-38N, 115W, NV	C	Stewart, 1978	2-5		13-11		0.128	0.289	0.292	0.293	0.465	0.0857
F0631	N	normal f E of Quinn Cyn Rng, 37-38N, 115W, NV	S	combined offset rate (1 GCN data)					0.000638	0.00198	0.268	0.273	0.731	0.245
F0623	N	normal f W of Schell Crk Rng, 38-40N, 114W, NV	C	Stewart, 1978	2-5		13-11		0.128	0.289	0.292	0.293	0.465	0.0857
F0623	N	normal f W of Schell Crk Rng, 38-40N, 114W, NV	C	Stewart, 1998 (scarp height only)	>(0.3-2)		<23.8	0	0.0405	0.142	0.36	1.45	8.49	6.93
F0623	N	normal f W of Schell Crk Rng, 38-40N, 114W, NV	S	combined offset rate (2 GCN data)					0.00102	0.00198	0.275	0.483	1.75	2.98
F2134	N	normal f.'s in Excelsior Mountains, NV [see L]	S	combined offset rate (0 GCN data)					0.000304	0.00102	0.183	0.25	1.09	0.343
F2186	N	normal fault 1 on W of Monitor Range, NV	S	combined offset rate (0 GCN data)					0.000304	0.00102	0.183	0.25	1.09	0.343
F2187	N	normal fault 2 on W of Monitor Range, NV	S	combined offset rate (0 GCN data)					0.000304	0.00102	0.183	0.25	1.09	0.343
F0618	N	normal fault E f Goshute Vly, W f Toana Mts., NV	C	Stewart, 1978	2-5		13-11		0.128	0.289	0.292	0.293	0.465	0.0857
F0618	N	normal fault E f Goshute Vly, W f Toana Mts., NV	C	Stewart, 1998 (scarp height only)	>(0.3-2)		<23.8	0	0.0405	0.142	0.36	1.45	8.49	6.93
F0618	N	normal fault E f Goshute Vly, W f Toana Mts., NV	S	combined offset rate (2 GCN data)					0.00102	0.00198	0.275	0.483	1.75	2.98
F0621	N	normal fault E of Highland Range, NV	C	Stewart, 1978	2-5		13-11		0.128	0.289	0.292	0.293	0.465	0.0857
F0621	N	normal fault E of Highland Range, NV	S	combined offset rate (1 GCN data)					0.000638	0.00198	0.268	0.273	0.731	0.245
F0526	N	normal fault on E side of East Humbolt Range, NV	C	Stewart, 1978	2-5		13-11		0.128	0.289	0.292	0.293	0.465	0.0857
F0526	N	normal fault on E side of East Humbolt Range, NV	C	Stewart, 1998 (scarp height only)	>(0.3-2)		<23.8	0	0.0405	0.142	0.36	1.45	8.49	6.93
F0526	N	normal fault on E side of East Humbolt Range, NV	S	combined offset rate (2 GCN data)					0.00102	0.00198	0.275	0.483	1.75	2.98
F0510	N	normal fault on E side of Independence Range, NV	C	Stewart, 1978	2-5		13-11		0.128	0.289	0.292	0.293	0.465	0.0857
F0510	N	normal fault on E side of Independence Range, NV	C	Stewart, 1998 (scarp height only)	>(0.3-2)		10	0	0.0573	0.199	0.338	0.758	3.37	3.42
F0510	N	normal fault on E side of Independence Range, NV	S	combined offset rate (2 GCN data)					0.00147	0.00198	0.28	0.405	1.46	1.8
F0498	N	normal fault on W side of central Egan Range, NV	S	combined offset rate (0 GCN data)					0.000304	0.00102	0.183	0.25	1.09	0.343
F2294	N	normal fault, 35N, 115W, NV	S	combined offset rate (0 GCN data)					0.000304	0.00102	0.183	0.25	1.09	0.343
F2295	N	normal fault, 35N, 115W, NV	S	combined offset rate (0 GCN data)					0.000304	0.00102	0.183	0.25	1.09	0.343
F2280	N	normal fault, 36-37N, 115W, NV	S	combined offset rate (0 GCN data)					0.000304	0.00102	0.183	0.25	1.09	0.343
F2282	N	normal fault, 36-37N, 115W, NV	S	combined offset rate (0 GCN data)					0.000304	0.00102	0.183	0.25	1.09	0.343
F2289	N	normal fault, 36N, 114W, NV	S	combined offset rate (0 GCN data)					0.000304	0.00102	0.183	0.25	1.09	0.343
F2290	N	normal fault, 36N, 114W, NV	S	combined offset rate (0 GCN data)					0.000304	0.00102	0.183	0.25	1.09	0.343
F2291	N	normal fault, 36N, 114W, NV	S	combined offset rate (0 GCN data)					0.000304	0.00102	0.183	0.25	1.09	0.343
F2292	N	normal fault, 36N, 114W, NV	S	combined offset rate (0 GCN data)					0.000304	0.00102	0.183	0.25	1.09	0.343
F2293	N	normal fault, 36N, 114W, NV	S	combined offset rate (0 GCN data)					0.000304	0.00102	0.183	0.25	1.09	0.343
F2278	N	normal fault, 36N, 115W, NV	S	combined offset rate (0 GCN data)					0.000304	0.00102	0.183	0.25	1.09	0.343
F2279	N	normal fault, 36N, 115W, NV	S	combined offset rate (0 GCN data)					0.000304	0.00102	0.183	0.25	1.09	0.343
F2281	N	normal fault, 36N, 115W, NV	S	combined offset rate (0 GCN data)					0.000304	0.00102	0.183	0.25	1.09	0.343
F2284	N	normal fault, 36N, 115W, NV	S	combined offset rate (0 GCN data)					0.000304	0.00102	0.183	0.25	1.09	0.343
F2285	N	normal fault, 36N, 115W, NV	S	combined offset rate (0 GCN data)					0.000304	0.00102	0.183	0.25	1.09	0.343
F2286	N	normal fault, 36N, 115W, NV	S	combined offset rate (0 GCN data)					0.000304	0.00102	0.183	0.25	1.09	0.343
F2287	N	normal fault, 36N, 115W, NV	S	combined offset rate (0 GCN data)					0.000304	0.00102	0.183	0.25	1.09	0.343
F2276	N	normal fault, 36N, 116W, NV	S	combined offset rate (0 GCN data)					0.000304	0.00102	0.183	0.25	1.09	0.343
F2184	N	normal fault, 37-38N, 116W, NV	S	combined offset rate (0 GCN data)					0.000304	0.00102	0.183	0.25	1.09	0.343
F2252	N	normal fault, 37-38N, 116W, NV	S	combined offset rate (0 GCN data)					0.000304	0.00102	0.183	0.25	1.09	0.343
F2266	N	normal fault, 37N, 115W, NV	S	combined offset rate (0 GCN data)					0.000304	0.00102	0.183	0.25	1.09	0.343
F2267	N	normal fault, 37N, 115W, NV	S	combined offset rate (0 GCN data)					0.000304	0.00102	0.183	0.25	1.09	0.343
F2263	N	normal fault, 37N, 116W, NV	S	combined offset rate (0 GCN data)					0.000304	0.00102	0.183	0.25	1.09	0.343
F2264	N	normal fault, 37N, 116W, NV	S	combined offset rate (0 GCN data)					0.000304	0.00102	0.183	0.25	1.09	0.343
F2265	N	normal fault, 37N, 116W, NV	S	combined offset rate (0 GCN data)					0.000304	0.00102	0.183	0.25	1.09	0.343
F2191	N	normal fault, 37N, 117W, NV	S	combined offset rate (0 GCN data)					0.000304	0.00102	0.183	0.25	1.09	0.343
F2192	N	normal fault, 37N, 117W, NV	S	combined offset rate (0 GCN data)					0.000304	0.00102	0.183	0.25	1.09	0.343
F2258	N	normal fault, 37N, 117W, NV	S	combined offset rate (0 GCN data)					0.000304	0.00102	0.183	0.25	1.09	0.343
F2259	N	normal fault, 37N, 117W, NV	S	combined offset rate (0 GCN data)					0.000304	0.00102	0.183	0.25	1.09	0.343
F2260	N	normal fault, 37N, 117W, NV	S	combined offset rate (0 GCN data)					0.000304	0.00102	0.183	0.25	1.09	0.343
F2261	N	normal fault, 37N, 117W, NV	S	combined offset rate (0 GCN data)					0.000304	0.00102	0.183	0.25	1.09	0.343
F2268	N	normal fault, 38-37N, 115W, NV	S	combined offset rate (0 GCN data)					0.000304	0.00102	0.183	0.25	1.09	0.343
F2269	N	normal fault, 38-37N, 115W, NV	S	combined offset rate (0 GCN data)					0.000304	0.00102	0.183	0.25	1.09	0.343
F2255	N	normal fault, 38-37N, 116W, NV	S	combined offset rate (0 GCN data)					0.000304	0.00102	0.183	0.25	1.09	0.343
F0620	N	normal fault, 38-39N, 114W, NV	C	Stewart, 1978	2-5		13-11		0.128	0.289	0.292	0.293	0.465	0.0857
F0620	N	normal fault, 38-39N, 114W, NV	C	Stewart, 1998 (scarp height only)	>(0.3-2)		<23.8	0	0.0405	0.142	0.36	1.45	8.49	6.93
F0620	N	normal fault, 38-39N, 114W, NV	S	combined offset rate (2 GCN data)					0.00102	0.00198	0.275	0.483	1.75	2.98
F0633	N	normal fault, 38-39N, 115W, NV	C	Stewart, 1978	2-5		13-11		0.128	0.289	0.292	0.293	0.465	0.0857
F0633	N	normal fault, 38-39N, 115W, NV	S	combined offset rate (1 GCN data)					0.000638	0.00198	0.268	0.273	0.731	0.245
F2242	N	normal fault, 38-39N, 115W, NV	S	combined offset rate (0 GCN data)					0.000304	0.00102	0.183	0.25	1.09	0.343
F0647	N	normal fault, 38-39N, 116W, NV	C	Stewart, 1978	2-5		13-11		0.128	0.289	0.292	0.293	0.465	0.0857
F0647	N	normal fault, 38-39N, 116W, NV	C	Stewart, 1998 (scarp height only)	>(0.3-2)		<23.8	0	0.0405	0.142	0.36	1.45	8.49	6.93
F0647	N	normal fault, 38-39N, 116W, NV	S	combined offset rate (2 GCN data)					0.00102	0.00198	0.275	0.483	1.75	2.98
F2230	N	normal fault, 38-39N, 119W, NV	S	combined offset rate (0 GCN data)					0.000304	0.00102	0.183	0.25	1.09	0.343
F1932	N	normal fault, 38N, 114W, NV	C	Stewart, 1998 (scarp height only)	>(0.3-2)		<23.8	0	0.0405	0.142	0.36	1.45	8.49	6.93
F1932	N	normal fault, 38N, 114W, NV	S	combined offset rate (1 GCN data)					0.000487	2.29E-6	0.247	0.701	3.37	4.3
F1933	N	normal fault, 38N, 114W, NV	C	Stewart, 1998 (scarp height only)	>(0.3-2)		<23.8	0	0.0405	0.142	0.36	1.45	8.49	6.93
F1933	N	normal fault, 38N, 114W, NV	S	combined offset rate (1 GCN data)					0.000487	2.29E-6	0.247	0.701	3.37	4.3
F2257	N	normal fault, 38N, 114W, NV	S	combined offset rate (0 GCN data)					0.000304	0.00102	0.183	0.25	1.09	0.343
F0650	N	normal fault, 38N, 115W, NV	C	Stewart, 1978	2-5		13-11		0.128	0.289	0.292	0.293	0.465	0.0857
F0650	N	normal fault, 38N, 115W, NV	S	combined offset rate (1 GCN data)					0.000638	0.00198	0.268	0.273	0.731	0.245
F2256	N	normal fault, 38N, 115W, NV	S	combined offset rate (0 GCN data)					0.000304	0.00102	0.183	0.25	1.09	0.343
F2251	N	normal fault, 38N, 116-117W, NV	S	combined offset rate (0 GCN data)					0.000304	0.00102	0.183	0.25	1.09	0.343
F2185	N	normal fault, 38N, 116W, NV	S	combined offset rate (0 GCN data)					0.000304	0.00102	0.183	0.25	1.09	0.343
F2253	N	normal fault, 38N, 116W, NV	S	combined offset rate (0 GCN data)					0.000304	0.00102	0.183	0.25	1.09	0.343
F2254	N	normal fault, 38N, 116W, NV	S	combined offset rate (0 GCN data)					0.000304	0.00102	0.183	0.25	1.09	0.343
F1930	N	normal fault, 38N, 117W, NV	C	Stewart, 1998 (scarp height only)	>(0.3-2)		<23.8	0	0.0405	0.142	0.36	1.45	8.49	6.93
F1930	N	normal fault, 38N, 117W, NV	S	combined offset rate (1 GCN data)					0.000487	2.29E-6	0.247	0.701	3.37	4.3
F1931	N	normal fault, 38N, 117W, NV	C	Stewart, 1998 (scarp height only)	>(0.3-2)		<23.8	0	0.0405	0.142	0.36	1.45	8.49	6.93
F1931	N	normal fault, 38N, 117W, NV	S	combined offset rate (1 GCN data)					0.000487	2.29E-6	0.247	0.701	3.37	4.3
F2250	N	normal fault, 38N, 117W, NV	S	combined offset rate (0 GCN data)					0.000304	0.00102	0.183	0.25	1.09	0.343
F2247	N	normal fault, 38N, 118-119W, NV	S	combined offset rate (0 GCN data)					0.000304	0.00102	0.183	0.25	1.09	0.343
F2193	N	normal fault, 38N, 118W, NV	S	combined offset rate (0 GCN data)					0.000304	0.00102	0.183	0.25	1.09	0.343
F2248	N	normal fault, 38N, 118W, NV	S	combined offset rate (0 GCN data)					0.000304	0.00102	0.183	0.25	1.09	0.343
F2270	N	normal fault, 38N, 118W, NV	S	combined offset rate (0 GCN data)					0.000304	0.00102	0.183	0.25	1.09	0.343
F2241	N	normal fault, 39-38N, 116W, NV	S	combined offset rate (0 GCN data)					0.000304	0.00102	0.183	0.25	1.09	0.343
F1663	N	normal fault, 39-38N, 117W, NV	C	Stewart, 1998 (scarp height only)	>(0.3-2)		13	0	0.0605	0.295	0.304	0.381	1.39	0.374
F1663	N	normal fault, 39-38N, 117W, NV	S	combined offset rate (1 GCN data)					0.000613	1.09E-7	0.264	0.316	1.25	0.365
F2236	N	normal fault, 39-38N, 117W, NV	S	combined offset rate (0 GCN data)					0.000304	0.00102	0.183	0.25	1.09	0.343
F1929	N	normal fault, 39-38N, 118W, NV	C	Stewart, 1998 (scarp height only)	>(0.3-2)		<23.8	0	0.0405	0.142	0.36	1.45	8.49	6.93
F1929	N	normal fault, 39-38N, 118W, NV	S	combined offset rate (1 GCN data)					0.000487	2.29E-6	0.247	0.701	3.37	4.3
F2235	N	normal fault, 39-40N, 117-116W, NV	S	combined offset rate (0 GCN data)					0.000304	0.00102	0.183	0.25	1.09	0.343
F2246	N	normal fault, 39N, 114W, NV	S	combined offset rate (0 GCN data)					0.000304	0.00102	0.183	0.25	1.09	0.343
F0646	N	normal fault, 39N, 115W, NV	C	Stewart, 1978	2-5		13-11		0.128	0.289	0.292	0.293	0.465	0.0857
F0646	N	normal fault, 39N, 115W, NV	S	combined offset rate (1 GCN data)					0.000638	0.00198	0.268	0.273	0.731	0.245
F1927	N	normal fault, 39N, 115W, NV	C	Stewart, 1998 (scarp height only)	>(0.3-2)		<23.8	0	0.0405	0.142	0.36	1.45	8.49	6.93
F1927	N	normal fault, 39N, 115W, NV	S	combined offset rate (1 GCN data)					0.000487	2.29E-6	0.247	0.701	3.37	4.3
F2243	N	normal fault, 39N, 115W, NV	S	combined offset rate (0 GCN data)					0.000304	0.00102	0.183	0.25	1.09	0.343
F2244	N	normal fault, 39N, 115W, NV	S	combined offset rate (0 GCN data)					0.000304	0.00102	0.183	0.25	1.09	0.343
F2245	N	normal fault, 39N, 115W, NV	S	combined offset rate (0 GCN data)					0.000304	0.00102	0.183	0.25	1.09	0.343
F0644	N	normal fault, 39N, 116W, NV	C	Stewart, 1978	2-5		13-11		0.128	0.289	0.292	0.293	0.465	0.0857
F0644	N	normal fault, 39N, 116W, NV	C	Stewart, 1998 (scarp height only)	>(0.3-2)		<23.8	0	0.0405	0.142	0.36	1.45	8.49	6.93
F0644	N	normal fault, 39N, 116W, NV	S	combined offset rate (2 GCN data)					0.00102	0.00198	0.275	0.483	1.75	2.98
F0645	N	normal fault, 39N, 116W, NV	C	Stewart, 1978	2-5		13-11		0.128	0.289	0.292	0.293	0.465	0.0857
F0645	N	normal fault, 39N, 116W, NV	S	combined offset rate (1 GCN data)					0.000638	0.00198	0.268	0.273	0.731	0.245
F2188	N	normal fault, 39N, 116W, NV	S	combined offset rate (0 GCN data)					0.000304	0.00102	0.183	0.25	1.09	0.343
F2237	N	normal fault, 39N, 116W, NV	S	combined offset rate (0 GCN data)					0.000304	0.00102	0.183	0.25	1.09	0.343
F2238	N	normal fault, 39N, 116W, NV	S	combined offset rate (0 GCN data)					0.000304	0.00102	0.183	0.25	1.09	0.343
F2239	N	normal fault, 39N, 116W, NV	S	combined offset rate (0 GCN data)					0.000304	0.00102	0.183	0.25	1.09	0.343
F2240	N	normal fault, 39N, 116W, NV	S	combined offset rate (0 GCN data)					0.000304	0.00102	0.183	0.25	1.09	0.343
F2233	N	normal fault, 39N, 117W, NV	S	combined offset rate (0 GCN data)					0.000304	0.00102	0.183	0.25	1.09	0.343
F0668	N	normal fault, 39N, 118-117W, NV	C	Stewart, 1978	2-5		12.5-8		0.147	0.33	0.342	0.349	0.586	0.111
F0668	N	normal fault, 39N, 118-117W, NV	C	Stewart, 1998 (scarp height only)	>(0.3-2)		13	0	0.0605	0.295	0.304	0.381	1.39	0.374
F0668	N	normal fault, 39N, 118-117W, NV	S	combined offset rate (2 GCN data)					0.0014	0.00177	0.309	0.326	0.826	0.253
F2232	N	normal fault, 39N, 118W, NV	S	combined offset rate (0 GCN data)					0.000304	0.00102	0.183	0.25	1.09	0.343
F0666	N	normal fault, 39N, 119-118W, NV	C	Stewart, 1978	2-5		12.5-8		0.147	0.33	0.342	0.349	0.586	0.111
F0666	N	normal fault, 39N, 119-118W, NV	S	combined offset rate (1 GCN data)					0.000693	0.00177	0.304	0.305	0.715	0.247
F2229	N	normal fault, 39N, 119W, NV	S	combined offset rate (0 GCN data)					0.000304	0.00102	0.183	0.25	1.09	0.343
F2231	N	normal fault, 39N, 119W, NV	S	combined offset rate (0 GCN data)					0.000304	0.00102	0.183	0.25	1.09	0.343
F2234	N	normal fault, 40-39N, 116-117W, NV	S	combined offset rate (0 GCN data)					0.000304	0.00102	0.183	0.25	1.09	0.343
F1662	N	normal fault, 40-41N, 114W, NV	S	combined offset rate (0 GCN data)					0.000304	0.00102	0.183	0.25	1.09	0.343
F0636	N	normal fault, 40-41N, 115W, NV	C	Stewart, 1978	2-5		13-11		0.128	0.289	0.292	0.293	0.465	0.0857
F0636	N	normal fault, 40-41N, 115W, NV	S	combined offset rate (1 GCN data)					0.000638	0.00198	0.268	0.273	0.731	0.245
F0638	N	normal fault, 40-41N, 116-117W, NV	C	Stewart, 1978	2-5		13-11		0.128	0.289	0.292	0.293	0.465	0.0857
F0638	N	normal fault, 40-41N, 116-117W, NV	C	Stewart, 1998 (scarp height only)	>(0.3-2)		<23.8	0	0.0405	0.142	0.36	1.45	8.49	6.93
F0638	N	normal fault, 40-41N, 116-117W, NV	S	combined offset rate (2 GCN data)					0.00102	0.00198	0.275	0.483	1.75	2.98
F2204	N	normal fault, 40-41N, 116W, NV	S	combined offset rate (0 GCN data)					0.000304	0.00102	0.183	0.25	1.09	0.343
F0679	N	normal fault, 40-41N, 118W, NV	C	Stewart, 1978	2-5		12.5-8		0.147	0.33	0.342	0.349	0.586	0.111
F0679	N	normal fault, 40-41N, 118W, NV	S	combined offset rate (1 GCN data)					0.000693	0.00177	0.304	0.305	0.715	0.247
F0663	N	normal fault, 40-41N, 119W, NV	C	Stewart, 1978	2-5		12.5-8		0.147	0.33	0.342	0.349	0.586	0.111
F0663	N	normal fault, 40-41N, 119W, NV	S	combined offset rate (1 GCN data)					0.000693	0.00177	0.304	0.305	0.715	0.247
F2221	N	normal fault, 40N, 114W, NV	S	combined offset rate (0 GCN data)					0.000304	0.00102	0.183	0.25	1.09	0.343
F2222	N	normal fault, 40N, 114W, NV	S	combined offset rate (0 GCN data)					0.000304	0.00102	0.183	0.25	1.09	0.343
F2223	N	normal fault, 40N, 114W, NV	S	combined offset rate (0 GCN data)					0.000304	0.00102	0.183	0.25	1.09	0.343
F2224	N	normal fault, 40N, 114W, NV	S	combined offset rate (0 GCN data)					0.000304	0.00102	0.183	0.25	1.09	0.343
F0635	N	normal fault, 40N, 115W, NV	C	Stewart, 1978	2-5		13-11		0.128	0.289	0.292	0.293	0.465	0.0857
F0635	N	normal fault, 40N, 115W, NV	S	combined offset rate (1 GCN data)					0.000638	0.00198	0.268	0.273	0.731	0.245
F2218	N	normal fault, 40N, 115W, NV	S	combined offset rate (0 GCN data)					0.000304	0.00102	0.183	0.25	1.09	0.343
F2219	N	normal fault, 40N, 115W, NV	S	combined offset rate (0 GCN data)					0.000304	0.00102	0.183	0.25	1.09	0.343
F2220	N	normal fault, 40N, 115W, NV	S	combined offset rate (0 GCN data)					0.000304	0.00102	0.183	0.25	1.09	0.343
F1659	N	normal fault, 40N, 116W, NV	S	combined offset rate (0 GCN data)					0.000304	0.00102	0.183	0.25	1.09	0.343
F0675	N	normal fault, 40N, 117W, NV	C	Stewart, 1978	2-5		12.5-8		0.147	0.33	0.342	0.349	0.586	0.111
F0675	N	normal fault, 40N, 117W, NV	S	combined offset rate (1 GCN data)					0.000693	0.00177	0.304	0.305	0.715	0.247
F2189	N	normal fault, 40N, 117W, NV	S	combined offset rate (0 GCN data)					0.000304	0.00102	0.183	0.25	1.09	0.343
F2216	N	normal fault, 40N, 117W, NV	S	combined offset rate (0 GCN data)					0.000304	0.00102	0.183	0.25	1.09	0.343
F2217	N	normal fault, 40N, 117W, NV	S	combined offset rate (0 GCN data)					0.000304	0.00102	0.183	0.25	1.09	0.343
F1926	N	normal fault, 40N, 118W, NV	C	Stewart, 1998 (scarp height only)	>(0.3-2)		23.8-8	0	0.0509	0.171	0.29	0.411	1.6	0.48
F1926	N	normal fault, 40N, 118W, NV	S	combined offset rate (1 GCN data)					0.000559	3.19E-7	0.243	0.324	1.35	0.419
F2214	N	normal fault, 40N, 118W, NV	S	combined offset rate (0 GCN data)					0.000304	0.00102	0.183	0.25	1.09	0.343
F2215	N	normal fault, 40N, 118W, NV	S	combined offset rate (0 GCN data)					0.000304	0.00102	0.183	0.25	1.09	0.343
F2180	N	normal fault, 40N, 119W, NV	C	Stewart, 1978	2-5		12.5-8		0.147	0.33	0.342	0.349	0.586	0.111
F2180	N	normal fault, 40N, 119W, NV	S	combined offset rate (1 GCN data)					0.000693	0.00177	0.304	0.305	0.715	0.247
F2210	N	normal fault, 40N, 119W, NV	S	combined offset rate (0 GCN data)					0.000304	0.00102	0.183	0.25	1.09	0.343
F2211	N	normal fault, 40N, 119W, NV	S	combined offset rate (0 GCN data)					0.000304	0.00102	0.183	0.25	1.09	0.343
F2212	N	normal fault, 40N, 119W, NV	S	combined offset rate (0 GCN data)					0.000304	0.00102	0.183	0.25	1.09	0.343
F2213	N	normal fault, 40N, 119W, NV	S	combined offset rate (0 GCN data)					0.000304	0.00102	0.183	0.25	1.09	0.343
F0617	N	normal fault, 41N, 114-115W, NV	C	Stewart, 1978	2-5		13-11		0.128	0.289	0.292	0.293	0.465	0.0857
F0617	N	normal fault, 41N, 114-115W, NV	C	Stewart, 1998 (scarp height only)	>(0.3-2)		<23.8	0	0.0405	0.142	0.36	1.45	8.49	6.93
F0617	N	normal fault, 41N, 114-115W, NV	S	combined offset rate (2 GCN data)					0.00102	0.00198	0.275	0.483	1.75	2.98
F1921	N	normal fault, 41N, 114W, NV	C	Stewart, 1998 (scarp height only)	>(0.3-2)		<23.8	0	0.0405	0.142	0.36	1.45	8.49	6.93
F1921	N	normal fault, 41N, 114W, NV	S	combined offset rate (1 GCN data)					0.000487	2.29E-6	0.247	0.701	3.37	4.3
F1922	N	normal fault, 41N, 114W, NV	C	Stewart, 1998 (scarp height only)	>(0.3-2)		<23.8	0	0.0405	0.142	0.36	1.45	8.49	6.93
F1922	N	normal fault, 41N, 114W, NV	S	combined offset rate (1 GCN data)					0.000487	2.29E-6	0.247	0.701	3.37	4.3
F1923	N	normal fault, 41N, 114W, NV	C	Stewart, 1998 (scarp height only)	>(0.3-2)		<23.8	0	0.0405	0.142	0.36	1.45	8.49	6.93
F1923	N	normal fault, 41N, 114W, NV	S	combined offset rate (1 GCN data)					0.000487	2.29E-6	0.247	0.701	3.37	4.3
F1924	N	normal fault, 41N, 114W, NV	C	Stewart, 1998 (scarp height only)	>(0.3-2)		<23.8	0	0.0405	0.142	0.36	1.45	8.49	6.93
F1924	N	normal fault, 41N, 114W, NV	S	combined offset rate (1 GCN data)					0.000487	2.29E-6	0.247	0.701	3.37	4.3
F1925	N	normal fault, 41N, 114W, NV	C	Stewart, 1998 (scarp height only)	>(0.3-2)		<23.8	0	0.0405	0.142	0.36	1.45	8.49	6.93
F1925	N	normal fault, 41N, 114W, NV	S	combined offset rate (1 GCN data)					0.000487	2.29E-6	0.247	0.701	3.37	4.3
F1917	N	normal fault, 41N, 115W, NV	C	Stewart, 1998 (scarp height only)	>(0.3-2)		<23.8	0	0.0405	0.142	0.36	1.45	8.49	6.93
F1917	N	normal fault, 41N, 115W, NV	S	combined offset rate (1 GCN data)					0.000487	2.29E-6	0.247	0.701	3.37	4.3
F1918	N	normal fault, 41N, 115W, NV	C	Stewart, 1998 (scarp height only)	>(0.3-2)		<23.8	0	0.0405	0.142	0.36	1.45	8.49	6.93
F1918	N	normal fault, 41N, 115W, NV	S	combined offset rate (1 GCN data)					0.000487	2.29E-6	0.247	0.701	3.37	4.3
F1920	N	normal fault, 41N, 115W, NV	C	Stewart, 1998 (scarp height only)	>(0.3-2)		<23.8	0	0.0405	0.142	0.36	1.45	8.49	6.93
F1920	N	normal fault, 41N, 115W, NV	S	combined offset rate (1 GCN data)					0.000487	2.29E-6	0.247	0.701	3.37	4.3
F2207	N	normal fault, 41N, 115W, NV	S	combined offset rate (0 GCN data)					0.000304	0.00102	0.183	0.25	1.09	0.343
F2208	N	normal fault, 41N, 115W, NV	S	combined offset rate (0 GCN data)					0.000304	0.00102	0.183	0.25	1.09	0.343
F2209	N	normal fault, 41N, 115W, NV	S	combined offset rate (0 GCN data)					0.000304	0.00102	0.183	0.25	1.09	0.343
F1656	N	normal fault, 41N, 116W, NV	C	Stewart, 1998 (scarp height only)	>(0.3-2)		<23.8	0	0.0405	0.142	0.36	1.45	8.49	6.93
F1656	N	normal fault, 41N, 116W, NV	S	combined offset rate (1 GCN data)					0.000487	2.29E-6	0.247	0.701	3.37	4.3
F1657	N	normal fault, 41N, 116W, NV	C	Stewart, 1998 (scarp height only)	>(0.3-2)		<23.8	0	0.0405	0.142	0.36	1.45	8.49	6.93
F1657	N	normal fault, 41N, 116W, NV	S	combined offset rate (1 GCN data)					0.000487	2.29E-6	0.247	0.701	3.37	4.3
F2205	N	normal fault, 41N, 116W, NV	S	combined offset rate (0 GCN data)					0.000304	0.00102	0.183	0.25	1.09	0.343
F2206	N	normal fault, 41N, 116W, NV	S	combined offset rate (0 GCN data)					0.000304	0.00102	0.183	0.25	1.09	0.343
F2200	N	normal fault, 41N, 117W, NV	S	combined offset rate (0 GCN data)					0.000304	0.00102	0.183	0.25	1.09	0.343
F2201	N	normal fault, 41N, 117W, NV	S	combined offset rate (0 GCN data)					0.000304	0.00102	0.183	0.25	1.09	0.343
F2202	N	normal fault, 41N, 117W, NV	S	combined offset rate (0 GCN data)					0.000304	0.00102	0.183	0.25	1.09	0.343
F2203	N	normal fault, 41N, 117W, NV	S	combined offset rate (0 GCN data)					0.000304	0.00102	0.183	0.25	1.09	0.343
F0680	N	normal fault, 41N, 118W, NV	C	Stewart, 1978	2-5		12.5-8		0.147	0.33	0.342	0.349	0.586	0.111
F0680	N	normal fault, 41N, 118W, NV	S	combined offset rate (1 GCN data)					0.000693	0.00177	0.304	0.305	0.715	0.247
F0681	N	normal fault, 41N, 118W, NV	C	Stewart, 1978	2-5		12.5-8		0.147	0.33	0.342	0.349	0.586	0.111
F0681	N	normal fault, 41N, 118W, NV	S	combined offset rate (1 GCN data)					0.000693	0.00177	0.304	0.305	0.715	0.247
F2190	N	normal fault, 41N, 118W, NV	S	combined offset rate (0 GCN data)					0.000304	0.00102	0.183	0.25	1.09	0.343
F2199	N	normal fault, 41N, 118W, NV	C	Stewart, 1978	2-5		13-11		0.128	0.289	0.292	0.293	0.465	0.0857
F2199	N	normal fault, 41N, 118W, NV	C	Stewart, 1998 (scarp height only)	0.6-1.5		15	5	6.89E-6	1.5E-6	0.000189	0.000274	0.00102	0.000276
F2199	N	normal fault, 41N, 118W, NV	S	combined offset rate (2 GCN data)					8.78E-6	9.99E-7	0.000261	0.0398	0.381	0.134
F2198	N	normal fault, 41N, 119W, NV	S	combined offset rate (0 GCN data)					0.000304	0.00102	0.183	0.25	1.09	0.343
F0519	N	normal faults at N end of Las Vegas Range, NV	S	combined offset rate (0 GCN data)					0.000304	0.00102	0.183	0.25	1.09	0.343
F0517	N	normal faults btw Sonoma & Santa Rosa Rngs, NV	C	Loring, 1976			16.6	1.6	0.0000215	5.54E-6	0.000588	0.000848	0.00313	0.000846
F0517	N	normal faults btw Sonoma & Santa Rosa Rngs, NV	C	Stewart, 1978	2-5		12.5-8		0.147	0.33	0.342	0.349	0.586	0.111
F0517	N	normal faults btw Sonoma & Santa Rosa Rngs, NV	C	Stewart, 1998 (scarp height only)	>(0.3-2)		<23.8	0	0.0405	0.142	0.36	1.45	8.49	6.93
F0517	N	normal faults btw Sonoma & Santa Rosa Rngs, NV	S	combined offset rate (3 GCN data)					0.0000307	4.46E-6	0.000793	0.0727	0.461	1.1
F0522	N	normal faults in the Virginia Mountains, NV	S	combined offset rate (0 GCN data)					0.000304	0.00102	0.183	0.25	1.09	0.343
F0520	N	normal faults of S Carson Sink, NV	C	Loring, 1976			16.6	1.6	0.0000215	5.54E-6	0.000588	0.000848	0.00313	0.000846
F0520	N	normal faults of S Carson Sink, NV	S	combined offset rate (1 GCN data)					0.000025	4.44E-6	0.000725	0.037	0.399	0.157
F0518	N	normal faults of Snake River Plain margin, NV	S	combined offset rate (0 GCN data)					0.000304	0.00102	0.183	0.25	1.09	0.343
F2181	N	normal faults on E flank of Egan Range, NV	S	combined offset rate (0 GCN data)					0.000304	0.00102	0.183	0.25	1.09	0.343
F0523	N	normal faults on W side of Sand Springs Range, NV	S	combined offset rate (0 GCN data)					0.000304	0.00102	0.183	0.25	1.09	0.343
F2154	N	Northern Butte Valley normal fault, NV	S	combined offset rate (0 GCN data)					0.000304	0.00102	0.183	0.25	1.09	0.343
F2156	N	Northern Roberts Mountains normal fault, NV	S	combined offset rate (0 GCN data)					0.000304	0.00102	0.183	0.25	1.09	0.343
F2157	N	Northern Simpson Park Mountains normal f, NV	S	combined offset rate (0 GCN data)					0.000304	0.00102	0.183	0.25	1.09	0.343
F1554	L	Pahranagat sinistral fault zone, NV	A	Jayko, 1990	9-16		7.7		1.03	1.62	1.62	1.62	2.22	0.303
F1554	L	Pahranagat sinistral fault zone, NV	S	combined offset rate (1 GCN data)					0.253	2.86E-7	1.65	2.35	12.1	2.66
F2158	N	Paradise Range normal fault, NV	S	combined offset rate (0 GCN data)					0.000304	0.00102	0.183	0.25	1.09	0.343
F0653	N	Penoyer normal fault, NV	C	Stewart, 1978	2-5		7.5		0.206	0.467	0.467	0.467	0.728	0.133
F0653	N	Penoyer normal fault, NV	C	Haller et al., 2002 (1132)	0.0059		0.375?	0	0.00579	0.0159	0.0159	0.016	0.0269	0.00492
F0653	N	Penoyer normal fault, NV	S	combined offset rate (2 GCN data)					0.00544	0.0159	0.0167	0.0703	0.567	0.163
F2159	N	Petersen Mountain normal faults, NV	C	dePolo, 1998 (eastern strand; partial rate)	0.0055		.074-.024	0	0.0363	0.0889	0.113	0.125	0.265	0.0584
F2159	N	Petersen Mountain normal faults, NV	S	combined offset rate (1 GCN data)					0.00219	0.00185	0.115	0.143	0.405	0.148
F1705	D	Pine Valley low-angle normal fault, NV	A	Gordon and Heller, 1993	>5		9-5.3		0.659	0.862	2.58	5.91	36	9.15
F1705	D	Pine Valley low-angle normal fault, NV	S	combined offset rate (1 GCN data)					0.298	0.0429	2.31	5.41	35	8.79
F2161	N	Pleasant Valley normal fault, NV	S	combined offset rate (0 GCN data)					0.000304	0.00102	0.183	0.25	1.09	0.343
F1952	R	Pyramid Lake dextral fault, NV	C	Haller et al., 2002 (1669)	.027-.033		<0.013	0	2.09	2.71	4.57	10.7	66.2	20.3
F1952	R	Pyramid Lake dextral fault, NV	S	combined offset rate (1 GCN data)					0.697	2.72	4.64	10.8	59.1	19.4
F0632	N	Railroad Valley normal fault, NV	C	Stewart, 1978	2-5		13-11		0.128	0.289	0.292	0.293	0.465	0.0857
F0632	N	Railroad Valley normal fault, NV	C	Stewart, 1998 (scarp height only)	>(0.3-2)		<23.8	0	0.0405	0.142	0.36	1.45	8.49	6.93
F0632	N	Railroad Valley normal fault, NV	C	dePolo, 1998	.0126-.0142		.75-.13	0	0.0159	0.0204	0.0305	0.0379	0.0944	0.0212
F0632	N	Railroad Valley normal fault, NV	C	Haller et al., 2002 (1380)	0.014		0.2?	0	0.0578	0.0855	0.0923	0.12	0.271	0.753
F0632	N	Railroad Valley normal fault, NV	C	USGS Fault & Fold Database, 2005.01	0.007		.07-.03	0	0.0572	0.12	0.141	0.151	0.294	0.06
F0632	N	Railroad Valley normal fault, NV	S	combined offset rate (5 GCN data)					0.0609	0.0966	0.0931	0.0917	0.116	0.0153
F0667	R	Rainbow Mountain dextral fault [F0667N], NV	S	combined offset rate (0 GCN data)					0.0381	0.00713	6.18	11.6	42.8	12.6
F0667	N	Rainbow Mountain normal fault, NV [F0667R]	C	Stewart, 1978	2-5		12.5-8		0.147	0.33	0.342	0.349	0.586	0.111
F0667	N	Rainbow Mountain normal fault, NV [F0667R]	C	Stewart, 1998 (scarp height only)	>(0.3-2)		13-6	0	0.0682	0.245	0.319	0.428	1.58	0.443
F0667	N	Rainbow Mountain normal fault, NV [F0667R]	C	Haller et al., 2002 (1679) {oblique slip rate}	.0013-.0018		.0145-.0118	0	0.0146	0.133	0.142	0.155	0.385	0.0919
F0667	N	Rainbow Mountain normal fault, NV [F0667R]	S	combined offset rate (3 GCN data)					0.0429	0.176	0.213	0.23	0.468	0.143
F0512	N	Ruby Mountains-North Huntington Vly n.f., NV	C	Loring, 1976			16.6	1.6	0.0000215	5.54E-6	0.000588	0.000848	0.00313	0.000846
F0512	N	Ruby Mountains-North Huntington Vly n.f., NV	C	Stewart, 1978	2-5		13-11		0.128	0.289	0.292	0.293	0.465	0.0857
F0512	N	Ruby Mountains-North Huntington Vly n.f., NV	C	Stewart, 1998 (scarp height only)	>(0.3-2)		<23.8	0	0.0405	0.142	0.36	1.45	8.49	6.93
F0512	N	Ruby Mountains-North Huntington Vly n.f., NV	C	dePolo, 1998	.0208		.12-.06	0	0.16	0.195	0.231	0.241	0.366	0.0561
F0512	N	Ruby Mountains-North Huntington Vly n.f., NV	C	Haller et al., 2002 (1573ab; Ruby Mountains fault	0.0208		0.074?	0	0.256	0.297	0.356	0.677	2.28	3.3
F0512	N	Ruby Mountains-North Huntington Vly n.f., NV	S	combined offset rate (4* GCN data)					0.23	0.284	0.294	0.295	0.358	0.0311
F0513	N	Ruby Valley normal fault, NV	C	Stewart, 1978	2-5		13-11		0.128	0.289	0.292	0.293	0.465	0.0857
F0513	N	Ruby Valley normal fault, NV	C	Stewart, 1998 (scarp height only)	>(0.3-2)		<23.8	0	0.0405	0.142	0.36	1.45	8.49	6.93
F0513	N	Ruby Valley normal fault, NV	S	combined offset rate (2 GCN data)					0.00102	0.00198	0.275	0.483	1.75	2.98
F2166	N	San Emidio normal fault, NV	S	combined offset rate (0 GCN data)					0.000304	0.00102	0.183	0.25	1.09	0.343
F2167	N	Sand Springs Range normal fault, NV	S	combined offset rate (0 GCN data)					0.000304	0.00102	0.183	0.25	1.09	0.343
F0624	N	Schell Creek Range normal fault, NV	C	Stewart, 1978	2-5		13-11		0.128	0.289	0.292	0.293	0.465	0.0857
F0624	N	Schell Creek Range normal fault, NV	S	combined offset rate (1 GCN data)					0.000638	0.00198	0.268	0.273	0.731	0.245
F2391	N	Selenite Range normal fault, NV	C	Stewart, 1978	2-5		12.5-8		0.147	0.33	0.342	0.349	0.586	0.111
F2391	N	Selenite Range normal fault, NV	C	Stewart, 1998			12	5	6.89E-6	1.5E-6	0.000189	0.000274	0.00102	0.000276
F2391	N	Selenite Range normal fault, NV	S	combined offset rate (2 GCN data)					8.62E-6	9.99E-7	0.000263	0.0446	0.438	0.143
F2169	N	Seven Troughs Range normal fault, NV	S	combined offset rate (0 GCN data)					0.000304	0.00102	0.183	0.25	1.09	0.343
F2283	N	Sheep Basin normal fault, NV	C	dePolo, 1998	0.022		0.5?	0	0.034	0.0437	0.0447	0.0453	0.0598	0.00653
F2283	N	Sheep Basin normal fault, NV	C	Haller et al., 2002 (1115)	0.022		0.5?	0	0.034	0.0437	0.0447	0.0453	0.0598	0.00653
F2283	N	Sheep Basin normal fault, NV	S	combined offset rate (2 GCN data)					0.0357	0.0436	0.0443	0.049	0.0584	0.058
F2172	N	Sheep Creek Range southeastern n. f., NV	S	combined offset rate (0 GCN data)					0.000304	0.00102	0.183	0.25	1.09	0.343
F0478	N	Shingle Pass normal fault, S. Egan Range, NV	S	combined offset rate (0 GCN data)					0.000304	0.00102	0.183	0.25	1.09	0.343
F2170	N	Shoshone Range normal fault, NV	C	Stewart, 1978	2-5		13-11		0.128	0.289	0.292	0.293	0.465	0.0857
F2170	N	Shoshone Range normal fault, NV	C	Stewart, 1998 (scarp height only)	>(0.3-2)		10	0	0.0573	0.199	0.338	0.758	3.37	3.42
F2170	N	Shoshone Range normal fault, NV	S	combined offset rate (2 GCN data)					0.00147	0.00198	0.28	0.405	1.46	1.8
F0643	N	Simpson Park Mountains normal fault, NV	C	Stewart, 1978	2-5		13-11		0.128	0.289	0.292	0.293	0.465	0.0857
F0643	N	Simpson Park Mountains normal fault, NV	S	combined offset rate (1 GCN data)					0.000638	0.00198	0.268	0.273	0.731	0.245
F2171	N	Singatse Range normal fault, NV (F0658D)	S	combined offset rate (0 GCN data)					0.000304	0.00102	0.183	0.25	1.09	0.343
F2134	L	sinistral f.'s in Excelsior Mountains, NV [see N]	S	combined offset rate (0 GCN data)					0.00356	0.00356	2.23	4.33	15.4	4.56
F2137	L	sinistral faults #1302, 38N, 118W, NV	S	combined offset rate (0 GCN data)					0.00356	0.00356	2.23	4.33	15.4	4.56
F2135	L	sinistral faults #1303, 38N, 118W, NV	S	combined offset rate (0 GCN data)					0.00356	0.00356	2.23	4.33	15.4	4.56
F2165	L	sinistral faults in southern Garfield Hills, NV	S	combined offset rate (0 GCN data)					0.00356	0.00356	2.23	4.33	15.4	4.56
F2273	L	sinistral(?) fault, 36-37N, 116W, NV	S	combined offset rate (0 GCN data)					0.00356	0.00356	2.23	4.33	15.4	4.56
F2272	L	sinistral(?) fault, 36N, 116W, NV	S	combined offset rate (0 GCN data)					0.00356	0.00356	2.23	4.33	15.4	4.56
F2274	L	sinistral(?) fault, 36N, 116W, NV	S	combined offset rate (0 GCN data)					0.00356	0.00356	2.23	4.33	15.4	4.56
F2226	L	sinistral(?) fault, 39N, 119W, NV	S	combined offset rate (0 GCN data)					0.00356	0.00356	2.23	4.33	15.4	4.56
F2227	L	sinistral(?) fault, 39N, 119W, NV	S	combined offset rate (0 GCN data)					0.00356	0.00356	2.23	4.33	15.4	4.56
F2228	L	sinistral(?) fault, 39N, 119W, NV	S	combined offset rate (0 GCN data)					0.00356	0.00356	2.23	4.33	15.4	4.56
F2162	N	southern train, Steens normal fault, OR-NV	C	Stewart, 1978	2-5		13-11		0.128	0.289	0.292	0.293	0.465	0.0857
F2162	N	southern train, Steens normal fault, OR-NV	C	Pezzopane and Weldon, 1993 (neotectonic rate)	0.002		<0.002	0	0.516	1.23	2.09	5.52	35.2	13.8
F2162	N	southern train, Steens normal fault, OR-NV	C	Stewart, 1998 (scarp height only)	0.6-1.5		15	5	6.89E-6	1.5E-6	0.000189	0.000274	0.00102	0.000276
F2162	N	southern train, Steens normal fault, OR-NV	S	combined offset rate (2* GCN data)					0.0658	0.00198	0.395	2.43	16	9.15
F2174	L	Spanish Springs Peak sinistral fault, NV	S	combined offset rate (0 GCN data)					0.00356	0.00356	2.23	4.33	15.4	4.56
F2175	N	Spanish Springs Valley normal fault, NV	S	combined offset rate (0 GCN data)					0.000304	0.00102	0.183	0.25	1.09	0.343
F1661	N	Spruce Mountain Ridge normal fault, NV	C	Stewart, 1998 (scarp height only)	>(0.3-2)		<23.8	0	0.0405	0.142	0.36	1.45	8.49	6.93
F1661	N	Spruce Mountain Ridge normal fault, NV	S	combined offset rate (1 GCN data)					0.000487	2.29E-6	0.247	0.701	3.37	4.3
F0595	N	Surprise Valley normal fault, OR-CA-NV	C	Stewart, 1978	2-5		13-11		0.128	0.289	0.292	0.293	0.465	0.0857
F0595	N	Surprise Valley normal fault, OR-CA-NV	C	Cole and Armentrout, 1979				>5.3	2.69E-6	3.06E-7	0.0000817	0.000135	0.000576	0.000158
F0595	N	Surprise Valley normal fault, OR-CA-NV	B	Pezzopane and Weldon, 1993 (neotectonic rate)	0.014		<0.028?	0	0.467	0.599	0.999	3.06	18.4	10.2
F0595	N	Surprise Valley normal fault, OR-CA-NV	C	Stewart, 1998 (scarp height only)	0.6-1.5		<14	<4	0.0575	0.0855	0.152	0.594	2.93	4.07
F0595	N	Surprise Valley normal fault, OR-CA-NV	C	Personius et al., 2003 (not mapped)				>1.6?	8.86E-6	1.11E-6	0.000269	0.000446	0.0019	0.000524
F0595	N	Surprise Valley normal fault, OR-CA-NV	S	combined offset rate (3* GCN data)					0.0000137	2.29E-6	0.000385	0.0495	0.365	0.762
F0671	N	SW Reese R. Vly.-Indian Vly. normal fault, NV	C	Stewart, 1978	2-5		12.5-8		0.147	0.33	0.342	0.349	0.586	0.111
F0671	N	SW Reese R. Vly.-Indian Vly. normal fault, NV	C	Stewart, 1998 (scarp height only)	>(0.3-2)		<23.8	0	0.0405	0.142	0.36	1.45	8.49	6.93
F0671	N	SW Reese R. Vly.-Indian Vly. normal fault, NV	S	combined offset rate (2 GCN data)					0.00111	0.00177	0.309	0.496	1.63	2.86
F2131	N	The Lava Beds normal fault, NV	S	combined offset rate (0 GCN data)					0.000304	0.00102	0.183	0.25	1.09	0.343
F0673	N	Toiyabe Range normal fault, NV	C	Stewart, 1978	2-5		12.5-8		0.147	0.33	0.342	0.349	0.586	0.111
F0673	N	Toiyabe Range normal fault, NV	C	Stewart, 1998 (scarp height only)	>(0.3-2)		<23.8	0	0.0405	0.142	0.36	1.45	8.49	6.93
F0673	N	Toiyabe Range normal fault, NV	C	dePolo, 1998	0.0434		0.7-0.13	0	0.0602	0.0696	0.105	0.128	0.301	0.066
F0673	N	Toiyabe Range normal fault, NV	C	Haller et al., 2002 (1337)	0.0434		0.2?	0	0.154	0.212	0.252	0.332	0.786	1.28
F0673	N	Toiyabe Range normal fault, NV	S	combined offset rate (4 GCN data)					0.153	0.221	0.226	0.23	0.323	0.0453
F2153	N	Warner Valley normal faults (E), NV	S	combined offset rate (0 GCN data)					0.000304	0.00102	0.183	0.25	1.09	0.343
F0657	N	Wassuk Range normal fault, NV	C	Stewart, 1978	2-5		12.5-8		0.147	0.33	0.342	0.349	0.586	0.111
F0657	N	Wassuk Range normal fault, NV	C	Stewart, 1998 (scarp height only)	>(0.3-2)		<11	0	0.0614	0.199	0.458	1.74	10.4	7.67
F0657	N	Wassuk Range normal fault, NV	C	dePolo, 1998	.0063-.0077		.0131-.0126	0	0.243	0.563	0.554	0.547	0.813	0.135
F0657	N	Wassuk Range normal fault, NV	S	combined offset rate (3 GCN data)					0.155	0.512	0.453	0.495	0.766	1.45
F2176	N	West Gate normal fault, NV	S	combined offset rate (0 GCN data)					0.000304	0.00102	0.183	0.25	1.09	0.343
F1665	N	West Spring Mountains normal fault, NV	S	combined offset rate (0 GCN data)					0.000304	0.00102	0.183	0.25	1.09	0.343
F0593	N	West Warner Valley normal fault, OR-NV	C	Stewart, 1978	2-5		13-11		0.128	0.289	0.292	0.293	0.465	0.0857
F0593	N	West Warner Valley normal fault, OR-NV	C	Cole and Armentrout, 1979				>5.3	2.69E-6	3.06E-7	0.0000817	0.000135	0.000576	0.000158
F0593	N	West Warner Valley normal fault, OR-NV	C	Stewart, 1998 (scarp height only)	0.6-1.5		15	5	6.89E-6	1.5E-6	0.000189	0.000274	0.00102	0.000276
F0593	N	West Warner Valley normal fault, OR-NV	S	combined offset rate (3 GCN data)					2.29E-6	8.16E-8	0.0000682	0.00585	0.000968	0.0529
F0642	N	Western Diamond Mountains normal fault, NV	C	Stewart, 1978	2-5		13-11		0.128	0.289	0.292	0.293	0.465	0.0857
F0642	N	Western Diamond Mountains normal fault, NV	C	Stewart, 1998 (scarp height only)	>(0.3-2)		<23.8	0	0.0405	0.142	0.36	1.45	8.49	6.93
F0642	N	Western Diamond Mountains normal fault, NV	S	combined offset rate (2 GCN data)					0.00102	0.00198	0.275	0.483	1.75	2.98
F0661	N	Western Granite Range normal fault, NV	C	Stewart, 1978	2-5		12.5-8		0.147	0.33	0.342	0.349	0.586	0.111
F0661	N	Western Granite Range normal fault, NV	S	combined offset rate (1 GCN data)					0.000693	0.00177	0.304	0.305	0.715	0.247
F0665	N	Western Humboldt Range normal fault, NV	C	Stewart, 1978	2-5		12.5-8		0.147	0.33	0.342	0.349	0.586	0.111
F0665	N	Western Humboldt Range normal fault, NV	C	Stewart, 1998 (scarp height only)	>(0.3-2)		23.8-8	0	0.0509	0.171	0.29	0.411	1.6	0.48
F0665	N	Western Humboldt Range normal fault, NV	S	combined offset rate (2 GCN data)					0.00127	0.00177	0.304	0.329	0.887	0.289
F0672	N	Western Toiyabe Range normal fault, NV	C	Stewart, 1978	2-5		12.5-8		0.147	0.33	0.342	0.349	0.586	0.111
F0672	N	Western Toiyabe Range normal fault, NV	S	combined offset rate (1 GCN data)					0.000693	0.00177	0.304	0.305	0.715	0.247
F0625	N	White River Valley normal fault, NV	C	Stewart, 1978	2-5		13-11		0.128	0.289	0.292	0.293	0.465	0.0857
F0625	N	White River Valley normal fault, NV	C	Stewart, 1998 (scarp height only)	>(0.3-2)		<23.8	0	0.0405	0.142	0.36	1.45	8.49	6.93
F0625	N	White River Valley normal fault, NV	C	dePolo, 1998	0.003		0.2-0.074	0	0.00311	0.017	0.0219	0.0249	0.0635	0.0155
F0625	N	White River Valley normal fault, NV	C	Haller et al., 2002 (1398)	0.004		0.2-0.074	0	0.00565	0.0226	0.0285	0.0316	0.0739	0.0175
F0625	N	White River Valley normal fault, NV	S	combined offset rate (4 GCN data)					0.01	0.022	0.0265	0.0294	0.0649	0.0186
F2195	N	Yucca Mountain normal fault 1, NV	S	combined offset rate (0 GCN data)					0.000304	0.00102	0.183	0.25	1.09	0.343
F2196	N	Yucca Mountain normal fault 2, NV	S	combined offset rate (0 GCN data)					0.000304	0.00102	0.183	0.25	1.09	0.343
F2197	N	Yucca Mountain normal fault 3, NV	S	combined offset rate (0 GCN data)					0.000304	0.00102	0.183	0.25	1.09	0.343
F1673	N	Abert Rim normal fault, OR	A	Pezzopane and Weldon, 1993 (neotectonic rate)	0.008		~0.016	0	0.254	0.513	0.507	0.503	0.727	0.112
F1673	N	Abert Rim normal fault, OR	C	Stewart, 1998 (scarp height only)	0.6-1.5		<14	<4	0.0575	0.0855	0.152	0.594	2.93	4.07
F1673	N	Abert Rim normal fault, OR	C	USGS Quat. Fault & Fold Datab., 2005.01 (N sectio	0.2-0.3		10-4	0	0.0135	0.0229	0.0309	0.0337	0.0666	0.0143
F1673	N	Abert Rim normal fault, OR	S	combined offset rate (3 GCN data)					0.0158	0.0571	0.0614	0.189	0.629	0.409
F1703	L	Alvin Canyon sinistral fault, offshore OR	S	combined offset rate (0 GCN data)					0.00356	0.00356	2.23	4.33	15.4	4.56
F2301	R	Battle Rock dextral(?) fault, OR	C	Personius et al., 2003 (896: terrane boundary)				0.2-0.105	0.00044	0.0000967	0.0123	0.0184	0.0714	0.0194
F2301	R	Battle Rock dextral(?) fault, OR	S	combined offset rate (1 GCN data)					0.000514	0.0000647	0.0156	1.7	23.9	6.28
F2301	N	Battle Rock normal(?) fault, OR	C	Personius et al., 2003 (896: neotectonic rate)				0.2-0.105	0.000201	0.0000759	0.00557	0.00841	0.0327	0.00892
F2301	N	Battle Rock normal(?) fault, OR	C	USGS Quat. Fault & Fold Datab., 2005.01	0.02		~0.2?	0	0.0574	0.0855	0.114	0.155	0.382	0.859
F2301	N	Battle Rock normal(?) fault, OR	S	combined offset rate (2 GCN data)					0.000242	0.0000609	0.0075	0.0336	0.208	0.312
F2302	N	Beaver Creek normal fault, OR	C	Personius et al., 2003 (895; neotectonic rate)	0.04		>0.22	<0.13	0.0276	0.0619	0.0898	0.0955	0.188	0.0444
F2302	N	Beaver Creek normal fault, OR	C	USGS Quat. Fault & Fold Datab., 2005.01	0.04		~0.2?	0	0.131	0.196	0.232	0.307	0.734	1.23
F2302	N	Beaver Creek normal fault, OR	S	combined offset rate (2 GCN data)					0.0477	0.16	0.159	0.171	0.353	0.44
F2303	T	Bolton reverse(?) fault, OR	C	Weldon et al., 2003 (not mapped)				>1.6?	4.19E-6	5.23E-7	0.000127	0.000211	0.0009	0.000248
F2303	T	Bolton reverse(?) fault, OR	C	Personius et al., 2003 (874: reverse/dextral?)	0.2		12	<1.6	0.00848	0.0166	0.0167	0.0167	0.0251	0.00423
F2303	T	Bolton reverse(?) fault, OR	S	combined offset rate (2 GCN data)					0.0000106	4.16E-8	0.00125	0.0396	0.47	0.228
F1653	R	Brothers dextral fault, OR	C	Personius et al., 2003 (819 = 63-km-long traces a				>1.6?	0.0000188	2.35E-6	0.000572	0.000947	0.00405	0.00111
F1653	R	Brothers dextral fault, OR	S	combined offset rate (1 GCN data)					0.0000226	5.71E-7	0.000745	1.68	23.9	6.29
F2304	N	Brownlee n. f. of Pine Valley graben, ID-OR	C	Personius et al., 2003 (809a)	0.17		12?	<1.6	0.0128	0.0141	0.0142	0.0142	0.0157	0.000743
F2304	N	Brownlee n. f. of Pine Valley graben, ID-OR	S	combined offset rate (1 GCN data)					0.000638	0.0141	0.0147	0.127	0.731	0.264
F2305	T	Cape Blanco anticline blind thrust, OR	S	combined offset rate (0 GCN data)					0.000958	0.000519	0.228	0.544	2.41	0.691
F2357	R	Clackamas River dextral fault zone, OR	S	combined offset rate (0 GCN data)					0.0381	0.00713	6.18	11.6	42.8	12.6
F2363	L	Coos Basin sinistral fault, offshore OR	S	combined offset rate (0 GCN data)					0.00356	0.00356	2.23	4.33	15.4	4.56
F2306	R	Coquille blind thrust(?) fault, OR	C	Personius et al., 2003 (893)	0.02-0.05		0.08	<0.015	0.215	0.484	0.579	0.987	3.38	3.95
F2306	R	Coquille blind thrust(?) fault, OR	C	USGS Quat. Fault & Fold Datab., 2005.01	.018-.02		0.08	0	0.154	0.257	0.31	0.56	1.83	2.91
F2306	R	Coquille blind thrust(?) fault, OR	S	combined offset rate (2 GCN data)					0.192	0.329	0.374	0.723	1.88	2.98
F2307	N	Cottonwood Mountain normal fault, OR	S	combined offset rate (0 GCN data)					0.000304	0.00102	0.183	0.25	1.09	0.343
F0578	N	Crowley train, Steens normal fault, OR	C	Stewart, 1998 (scarp height only)	0.6-1.5		16-7	<4	0.0376	0.0812	0.0913	0.0967	0.183	0.0372
F0578	N	Crowley train, Steens normal fault, OR	C	Personius et al., 2003 (856a = SW part only)	~0.2		12?	<0.75	0.00847	0.0166	0.0167	0.0167	0.0251	0.00423
F0578	N	Crowley train, Steens normal fault, OR	S	combined offset rate (2 GCN data)					0.00137	0.0177	0.0224	0.0894	0.476	0.187
F1702	L	Daisy Bank sinistral fault, offshore OR	S	combined offset rate (0 GCN data)					0.00356	0.00356	2.23	4.33	15.4	4.56
F2352	N	Donner und Blitzen normal fault, OR	C	Personius et al., 2003 (821)	0.3-0.45		9.5	<1.6	0.0292	0.0395	0.0395	0.0395	0.0498	0.00526
F2352	N	Donner und Blitzen normal fault, OR	S	combined offset rate (1 GCN data)					0.000723	0.0394	0.0417	0.128	0.67	0.245
F1971	N	East Grande Ronde Valley normal fault, OR	C	Personius et al., 2003 (803)	1.2		17-15	<0.015	0.0663	0.0746	0.075	0.0752	0.0849	0.00478
F1971	N	East Grande Ronde Valley normal fault, OR	S	combined offset rate (1 GCN data)					0.000557	8.16E-8	0.0771	0.171	0.804	0.268
F2354	N	East Guano Valley normal fault, NV-OR	C	Personius et al., 2003 (826)	~0.15		5	<1.6	0.0247	0.0294	0.03	0.0303	0.0377	0.00331
F2354	N	East Guano Valley normal fault, NV-OR	S	combined offset rate (1 GCN data)					0.00114	0.0295	0.0307	0.089	0.518	0.202
F0592	N	East Warner Valley normal fault, NV-OR	C	Stewart, 1978	2-5		13-11		0.128	0.289	0.292	0.293	0.465	0.0857
F0592	N	East Warner Valley normal fault, NV-OR	C	Cole and Armentrout, 1979				>5.3	2.69E-6	3.06E-7	0.0000817	0.000135	0.000576	0.000158
F0592	N	East Warner Valley normal fault, NV-OR	C	Stewart, 1998 (scarp height only)	0.6-1.5		15	5	6.89E-6	1.5E-6	0.000189	0.000274	0.00102	0.000276
F0592	N	East Warner Valley normal fault, NV-OR	C	dePolo, 1998 (not mapped)				>0	6.89E-6	1.5E-6	0.000189	0.000274	0.00102	0.000276
F0592	N	East Warner Valley normal fault, NV-OR	S	combined offset rate (4 GCN data)					1.5E-6	8.16E-8	0.0000401	0.0000609	0.000239	0.0000669
F2366	L	Fault H sinistral(?) fault, offshore OR	S	combined offset rate (0 GCN data)					0.00356	0.00356	2.23	4.33	15.4	4.56
F2310	R	Gales Creek dextral fault, OR	C	Personius et al., 2003 (718: dextral, + reverse?)	<12		65-23.8	<1.6	0.00678	0.00125	0.135	0.147	0.378	0.0985
F2310	R	Gales Creek dextral fault, OR	C	USGS Quat. Fault & Fold Datab., 2005.01 (718)	<12		65-23.8	<1.6?	0.00678	0.00125	0.135	0.147	0.378	0.0985
F2310	R	Gales Creek dextral fault, OR	S	combined offset rate (2 GCN data)					0.00901	0.00118	0.204	4.6	35.6	9.62
F2310	T	Gales Creek thrust fault, OR	C	Personius et al., 2003 (718: dextral, + reverse?)	~2		65-23.8	<1.6	0.0205	0.0381	0.045	0.0488	0.0947	0.0192
F2310	T	Gales Creek thrust fault, OR	C	USGS Quat. Fault & Fold Datab., 2005.01 (718)	~2		65-23.8	<1.6?	0.0205	0.0381	0.045	0.0488	0.0947	0.0192
F2310	T	Gales Creek thrust fault, OR	S	combined offset rate (2 GCN data)					0.012	0.0381	0.0503	0.241	1.87	0.494
F2311	N	Grant Butte normal fault, OR	C	Weldon et al., 2003 (not mapped)				>1.6?	8.86E-6	1.11E-6	0.000269	0.000446	0.0019	0.000524
F2311	N	Grant Butte normal fault, OR	C	Personius et al., 2003 (878; ENE strike, NNW dip)	<0.12		0.6-0.1	<0.75	0.00859	0.142	0.171	0.246	0.879	0.847
F2311	N	Grant Butte normal fault, OR	S	combined offset rate (1* GCN data)					0.00174	2.29E-6	0.172	0.247	0.909	0.794
F1698	T	Happy Camp reverse fault, OR	C	Personius et al., 2003 (not mapped)				>1.6?	4.19E-6	5.23E-7	0.000127	0.000211	0.0009	0.000248
F1698	T	Happy Camp reverse fault, OR	C	USGS Fault & Fold Db., 2005 (882; thrust, 10-18 d	0.001		18-12		6.64E-6	0.0000652	0.0000775	0.0000863	0.000223	0.0000564
F1698	T	Happy Camp reverse fault, OR	S	combined offset rate (2 GCN data)					4.61E-6	0.0000418	0.0000879	0.0419	0.571	0.24
F2364	L	Heceta South sinistral fault, offshore OR	S	combined offset rate (0 GCN data)					0.00356	0.00356	2.23	4.33	15.4	4.56
F2313	T	Helvetia reverse(?) fault, OR	S	combined offset rate (0 GCN data)					0.000958	0.000519	0.228	0.544	2.41	0.691
F2336	N	Hite normal fault, OR-WA	C	Personius et al., 2003 (845a; neotectonic rate)	0.2-0.3		12?	<1.6	0.0152	0.0208	0.0208	0.0209	0.0267	0.00292
F2336	N	Hite normal fault, OR-WA	S	combined offset rate (1 GCN data)					0.000638	0.0208	0.0227	0.13	0.731	0.263
F2336	L	Hite sinistral fault, OR-WA	S	combined offset rate (0 GCN data)					0.00356	0.00356	2.23	4.33	15.4	4.56
F2315	N	Juniper Mountain normal fault, OR	S	combined offset rate (0 GCN data)					0.000304	0.00102	0.183	0.25	1.09	0.343
F2309	N	Klamath graben n.f.s., East Klamath Lk. s., OR	C	Personius et al., 2003 (843b; E. Klamath Lk. faul	>(.07-.25)		~(4-3)	<1.6	0.0447	0.068	0.275	0.359	1.38	0.395
F2309	N	Klamath graben n.f.s., East Klamath Lk. s., OR	C	USGS Quat. Fault & Fold Datab., 2005.01 (843b)	>(.07-.25)		~(4-3)		0.0447	0.068	0.275	0.359	1.38	0.395
F2309	N	Klamath graben n.f.s., East Klamath Lk. s., OR	S	combined offset rate (2 GCN data)					0.0432	0.0712	0.239	0.271	0.781	0.256
F0583	N	Klamath graben n.f.s., South Klamath Lk. s., OR	C	Personius et al., 2003 (843c; S. Kl. Lk. sec., Kl	0.003		0.007	<0.015	0.0828	0.464	0.463	0.463	0.846	0.186
F0583	N	Klamath graben n.f.s., South Klamath Lk. s., OR	C	USGS Quaternary Fault & Fold Datab., 2005.01 (843	0.003		0.007	0	0.0828	0.464	0.463	0.463	0.846	0.186
F0583	N	Klamath graben n.f.s., South Klamath Lk. s., OR	S	combined offset rate (2 GCN data)					0.119	0.463	0.462	0.458	0.747	0.149
F1959	N	Klamath graben n.f.s., West Klamath Lk. s., OR	C	Pezzopane and Weldon, 1993 (neotectonic rate)	<2		1.8	0	0.0282	0.0075	0.558	0.591	1.37	0.375
F1959	N	Klamath graben n.f.s., West Klamath Lk. s., OR	C	Personius et al., 2003 (843; neotectonic rate)	0.011-0.16		0.2-0.024	<0.015	0.0909	0.487	0.768	1.07	3.87	0.977
F1959	N	Klamath graben n.f.s., West Klamath Lk. s., OR	C	Personius et al., 2003 (843; neotectonic rate)	0.021-0.025		0.13-0.15?	<0.015	0.128	0.163	0.164	0.165	0.204	0.0189
F1959	N	Klamath graben n.f.s., West Klamath Lk. s., OR	C	USGS Quat. Fault & Fold Datab., 2005.01 (843a)	0.021-0.025		0.13-0.15?	<0.015	0.128	0.163	0.164	0.165	0.204	0.0189
F1959	N	Klamath graben n.f.s., West Klamath Lk. s., OR	C	USGS Quat. Fault & Fold Datab., 2005.01 (843a)	0.011-0.16		0.205-0.024		0.0954	0.544	0.779	1.07	3.84	0.963
F1959	N	Klamath graben n.f.s., West Klamath Lk. s., OR	S	combined offset rate (5 GCN data)					0.142	0.163	0.165	0.165	0.191	0.0127
F2351	N	Mann Lake train, Steens normal fault, OR	C	Personius et al., 2003 (856b)	>1.6		17-15	<0.75	0.112	0.294	0.313	0.4	1.43	0.376
F2351	N	Mann Lake train, Steens normal fault, OR	S	combined offset rate (1 GCN data)					0.000557	1.17E-7	0.266	0.319	1.26	0.366
F1443	N	Metolius normal fault, OR	A	Smith et al., 1987	>0.7		6-5.4	<5.3	0.131	0.293	0.319	0.412	1.46	0.381
F1443	N	Metolius normal fault, OR	C	Weldon et al., 2003 (not mapped)				>1.6?	8.86E-6	1.11E-6	0.000269	0.000446	0.0019	0.000524
F1443	N	Metolius normal fault, OR	C	Personius et al., 2003 (not mapped)				>1.6?	8.86E-6	1.11E-6	0.000269	0.000446	0.0019	0.000524
F1443	N	Metolius normal fault, OR	S	combined offset rate (3 GCN data)					5.15E-6	1.23E-7	0.000162	0.0378	0.415	0.164
F1962	N	Metolius-Green Ridge normal fault, OR	S	combined offset rate (0 GCN data)					0.000304	0.00102	0.183	0.25	1.09	0.343
F2317	T	Mill Creek reverse fault, OR	C	Personius et al., 2003 (871; Mill Creek fault)	0.15-0.21		15?	<1.6	0.00932	0.012	0.012	0.012	0.0148	0.00139
F2317	T	Mill Creek reverse fault, OR	C	USGS Q. F. & F. D., 2005.01 (reverse/sinistral, 7	0.10-0.21		15?		0.00553	0.0103	0.0103	0.0103	0.0152	0.00247
F2317	T	Mill Creek reverse fault, OR	S	combined offset rate (2 GCN data)					0.00663	0.0117	0.0122	0.161	1.64	0.437
F2317	L	Mill Creek sinistral fault, OR	S	combined offset rate (0 GCN data)					0.00356	0.00356	2.23	4.33	15.4	4.56
F2318	R	Mount Angel dextral fault, OR	S	combined offset rate (0 GCN data)					0.0381	0.00713	6.18	11.6	42.8	12.6
F2318	T	Mount Angel reverse fault, OR	C	Personius et al., 2003 (873: neotectonic rate)	0.2-0.25		12	<0.015	0.0157	0.0187	0.0188	0.0188	0.022	0.0016
F2318	T	Mount Angel reverse fault, OR	C	Personius et al., 2003 (873: neotectonic rate)	<0.019		.034-.023	<0.015	0.0239	0.28	0.339	0.344	0.717	0.199
F2318	T	Mount Angel reverse fault, OR	C	USGS Quaternary Fault & Fold Database, 2005.01	0.2-0.25		12	0	0.0157	0.0187	0.0188	0.0188	0.022	0.0016
F2318	T	Mount Angel reverse fault, OR	C	USGS Quaternary Fault & Fold Database, 2005.01	~1?		~12?	0	0.0136	0.0831	0.0845	0.0858	0.166	0.0395
F2318	T	Mount Angel reverse fault, OR	C	USGS Quaternary Fault & Fold Database, 2005.01	<0.019		.034-.022	0	0.0243	0.294	0.345	0.351	0.742	0.204
F2318	T	Mount Angel reverse fault, OR	S	combined offset rate (5 GCN data)					0.0166	0.0187	0.0188	0.0188	0.0211	0.00219
F2319	N	Mount Hood normal fault, OR	C	Personius et al., 2003 (no such fault)				>1.6	8.86E-6	1.11E-6	0.000269	0.000446	0.0019	0.000524
F2319	N	Mount Hood normal fault, OR	C	USGS Quat. Fault & Fold Datab., 2005.01 (no such				>1.6	8.86E-6	1.11E-6	0.000269	0.000446	0.0019	0.000524
F2319	N	Mount Hood normal fault, OR	S	combined offset rate (2 GCN data)					4.7E-6	8.16E-8	0.000141	0.00551	0.00185	0.0613
F2365	R	Nehalem Bank dextral fault, offshore OR	S	combined offset rate (0 GCN data)					0.0381	0.00713	6.18	11.6	42.8	12.6
F2320	R	Newberg dextral fault, OR	S	combined offset rate (0 GCN data)					0.0381	0.00713	6.18	11.6	42.8	12.6
F2320	T	Newberg reverse fault, OR	S	combined offset rate (0 GCN data)					0.000958	0.000519	0.228	0.544	2.41	0.691
F1669	N	normal fault E of Klamath graben, OR	C	Pezzopane and Weldon, 1993 (neotectonic rate)	<2		1.8	0	0.0282	0.0075	0.558	0.591	1.37	0.375
F1669	N	normal fault E of Klamath graben, OR	C	Stewart, 1998 (scarp height only)	0.6-1.5		<14	<4	0.0575	0.0855	0.152	0.594	2.93	4.07
F1669	N	normal fault E of Klamath graben, OR	C	Personius et al., 2003 (not mapped)				>1.6?	8.86E-6	1.11E-6	0.000269	0.000446	0.0019	0.000524
F1669	N	normal fault E of Klamath graben, OR	S	combined offset rate (3 GCN data)					0.0000134	2.29E-6	0.000399	0.0597	0.749	0.457
F2355	N	normal fault E of Summer Lake, OR	C	Personius et al., 2003 (832)	>0.4		~15?	<0.75	0.0358	0.0415	0.269	0.33	1.27	0.361
F2355	N	normal fault E of Summer Lake, OR	S	combined offset rate (1 GCN data)					0.000574	1.05E-7	0.234	0.288	1.17	0.354
F1442	N	normal fault W of High Cascade graben, OR	A	Smith et al., 1987	>0.7		6-5.4	<5.3	0.131	0.293	0.319	0.412	1.46	0.381
F1442	N	normal fault W of High Cascade graben, OR	C	Personius et al., 2003 (not mapped)				>1.6?	8.86E-6	1.11E-6	0.000269	0.000446	0.0019	0.000524
F1442	N	normal fault W of High Cascade graben, OR	S	combined offset rate (2 GCN data)					0.0000168	1.23E-7	0.00117	0.176	0.952	0.32
F0585	N	normal fault, 41-42N, 121W, CA-OR	C	Stewart, 1998 (scarp height only)	0.6-1.5		16-7	<4	0.0376	0.0812	0.0913	0.0967	0.183	0.0372
F0585	N	normal fault, 41-42N, 121W, CA-OR	C	Personius et al., 2003 (not mapped)				>1.6?	8.86E-6	1.11E-6	0.000269	0.000446	0.0019	0.000524
F0585	N	normal fault, 41-42N, 121W, CA-OR	S	combined offset rate (2 GCN data)					0.0000122	8.16E-8	0.00039	0.0248	0.274	0.111
F0594	N	normal fault, 41N, 119-120W, CA-OR	C	Stewart, 1978	2-5		13-11		0.128	0.289	0.292	0.293	0.465	0.0857
F0594	N	normal fault, 41N, 119-120W, CA-OR	C	Cole and Armentrout, 1979				>5.3	2.69E-6	3.06E-7	0.0000817	0.000135	0.000576	0.000158
F0594	N	normal fault, 41N, 119-120W, CA-OR	S	combined offset rate (2 GCN data)					3.35E-6	8.16E-8	0.000113	0.0397	0.381	0.134
F0580	N	normal fault, 42N, 117W, OR	C	Stewart, 1998 (scarp height only)	0.6-1.5		16-7	<4	0.0376	0.0812	0.0913	0.0967	0.183	0.0372
F0580	N	normal fault, 42N, 117W, OR	C	Weldon et al., 2003 (not mapped)				>1.6?	8.86E-6	1.11E-6	0.000269	0.000446	0.0019	0.000524
F0580	N	normal fault, 42N, 117W, OR	C	Personius et al., 2003 (not mapped)				>1.6?	8.86E-6	1.11E-6	0.000269	0.000446	0.0019	0.000524
F0580	N	normal fault, 42N, 117W, OR	S	combined offset rate (3 GCN data)					5.2E-6	8.16E-8	0.000159	0.00381	0.00216	0.0433
F0581	N	normal fault, 42N, 117W, OR	C	Stewart, 1998 (scarp height only)	0.6-1.5		16-7	<4	0.0376	0.0812	0.0913	0.0967	0.183	0.0372
F0581	N	normal fault, 42N, 117W, OR	C	Weldon et al., 2003 (not mapped)				>1.6?	8.86E-6	1.11E-6	0.000269	0.000446	0.0019	0.000524
F0581	N	normal fault, 42N, 117W, OR	C	Personius et al., 2003 (not mapped)				>1.6?	8.86E-6	1.11E-6	0.000269	0.000446	0.0019	0.000524
F0581	N	normal fault, 42N, 117W, OR	S	combined offset rate (3 GCN data)					5.2E-6	8.16E-8	0.000159	0.00381	0.00216	0.0433
F1671	N	normal fault, 42N, 120W, OR	C	Stewart, 1998 (scarp height only)	0.6-1.5		<14	<4	0.0575	0.0855	0.152	0.594	2.93	4.07
F1671	N	normal fault, 42N, 120W, OR	C	Weldon et al., 2003 (not mapped)				>1.6?	8.86E-6	1.11E-6	0.000269	0.000446	0.0019	0.000524
F1671	N	normal fault, 42N, 120W, OR	C	Personius et al., 2003 (not mapped)				>1.6?	8.86E-6	1.11E-6	0.000269	0.000446	0.0019	0.000524
F1671	N	normal fault, 42N, 120W, OR	S	combined offset rate (3 GCN data)					6.91E-6	2.29E-6	0.000144	0.00907	0.00199	0.42
F1670	N	normal fault, 42N, 121-120W, OR	C	Stewart, 1998 (scarp height only)	0.6-1.5		<14	<4	0.0575	0.0855	0.152	0.594	2.93	4.07
F1670	N	normal fault, 42N, 121-120W, OR	C	Personius et al., 2003 (not mapped)				>1.6?	8.86E-6	1.11E-6	0.000269	0.000446	0.0019	0.000524
F1670	N	normal fault, 42N, 121-120W, OR	S	combined offset rate (2 GCN data)					0.0000127	2.29E-6	0.000351	0.0611	0.409	1.1
F1667	N	normal fault, 42N, 121W, OR	C	Personius et al., 2003 (not mapped)				>1.6?	8.86E-6	1.11E-6	0.000269	0.000446	0.0019	0.000524
F1667	N	normal fault, 42N, 121W, OR	S	combined offset rate (1 GCN data)					0.0000104	8.16E-8	0.000345	0.0367	0.399	0.157
F1668	N	normal fault, 42N, 121W, OR	C	Personius et al., 2003 (not mapped)				>1.6?	8.86E-6	1.11E-6	0.000269	0.000446	0.0019	0.000524
F1668	N	normal fault, 42N, 121W, OR	S	combined offset rate (1 GCN data)					0.0000104	8.16E-8	0.000345	0.0367	0.399	0.157
F0576	N	normal fault, 43N, 117W, OR	C	Stewart, 1998 (scarp height only)	0.6-1.5		16-7	<4	0.0376	0.0812	0.0913	0.0967	0.183	0.0372
F0576	N	normal fault, 43N, 117W, OR	S	combined offset rate (1 GCN data)					0.000652	0.00202	0.0994	0.168	0.72	0.248
F0577	N	normal fault, 43N, 117W, OR	C	Stewart, 1998 (scarp height only)	0.6-1.5		16-7	<4	0.0376	0.0812	0.0913	0.0967	0.183	0.0372
F0577	N	normal fault, 43N, 117W, OR	C	Weldon et al., 2003 (not mapped)				>1.6?	8.86E-6	1.11E-6	0.000269	0.000446	0.0019	0.000524
F0577	N	normal fault, 43N, 117W, OR	C	Personius et al., 2003 (not mapped)				>1.6?	8.86E-6	1.11E-6	0.000269	0.000446	0.0019	0.000524
F0577	N	normal fault, 43N, 117W, OR	S	combined offset rate (3 GCN data)					5.2E-6	8.16E-8	0.000159	0.00381	0.00216	0.0433
F0579	N	normal fault, 43N, 117W, OR	C	Stewart, 1998 (scarp height only)	0.6-1.5		16-7	<4	0.0376	0.0812	0.0913	0.0967	0.183	0.0372
F0579	N	normal fault, 43N, 117W, OR	C	Weldon et al., 2003 (not mapped)				>1.6?	8.86E-6	1.11E-6	0.000269	0.000446	0.0019	0.000524
F0579	N	normal fault, 43N, 117W, OR	C	Personius et al., 2003 (not mapped)				>1.6?	8.86E-6	1.11E-6	0.000269	0.000446	0.0019	0.000524
F0579	N	normal fault, 43N, 117W, OR	S	combined offset rate (3 GCN data)					5.2E-6	8.16E-8	0.000159	0.00381	0.00216	0.0433
F0597	N	normal fault, 43N, 120W, OR	C	Stewart, 1978	2-5		13-11		0.128	0.289	0.292	0.293	0.465	0.0857
F0597	N	normal fault, 43N, 120W, OR	C	Weldon et al., 2003 (not mapped)				>1.6?	8.86E-6	1.11E-6	0.000269	0.000446	0.0019	0.000524
F0597	N	normal fault, 43N, 120W, OR	C	Personius et al., 2003 (not mapped)				>1.6?	8.86E-6	1.11E-6	0.000269	0.000446	0.0019	0.000524
F0597	N	normal fault, 43N, 120W, OR	S	combined offset rate (3 GCN data)					4.97E-6	8.16E-8	0.000155	0.00599	0.00206	0.0529
F1666	N	normal fault, 43N, 121W, OR	C	Weldon et al., 2003 (not mapped)				>1.6?	8.86E-6	1.11E-6	0.000269	0.000446	0.0019	0.000524
F1666	N	normal fault, 43N, 121W, OR	S	combined offset rate (1 GCN data)					0.0000104	8.16E-8	0.000345	0.0367	0.399	0.157
F2321	N	Paulina Marsh normal fault, OR	C	Personius et al., 2003 (834)	0.002		0.0068	<0.015	0.0412	0.344	0.344	0.35	0.711	0.171
F2321	N	Paulina Marsh normal fault, OR	C	USGS Quat. Fault & Fold Datab., 2005.01 (90 deg.	0.002		0.0068		0.0412	0.344	0.344	0.35	0.711	0.171
F2321	N	Paulina Marsh normal fault, OR	S	combined offset rate (2 GCN data)					0.0561	0.343	0.339	0.339	0.622	0.141
F2322	R	Portland Hills dextral fault, OR	C	Weldon et al., 2003 (not mapped)				>1.6?	0.0000188	2.35E-6	0.000572	0.000947	0.00405	0.00111
F2322	R	Portland Hills dextral fault, OR	S	combined offset rate (1 GCN data)					0.0000226	5.71E-7	0.000745	1.68	23.9	6.29
F2322	T	Portland Hills reverse(?) fault, OR	C	Weldon et al., 2003 (not mapped)				>1.6?	4.19E-6	5.23E-7	0.000127	0.000211	0.0009	0.000248
F2322	T	Portland Hills reverse(?) fault, OR	C	Personius et al., 2003 (877)	0.25-0.35		12	<1.6	0.0193	0.0249	0.025	0.025	0.031	0.00297
F2322	T	Portland Hills reverse(?) fault, OR	C	USGS Quaternary Fault & Fold Database, 2005.01	0.25-0.35		~12	0	0.0193	0.0249	0.025	0.025	0.031	0.00297
F2322	T	Portland Hills reverse(?) fault, OR	S	combined offset rate (3 GCN data)					7.46E-6	4.16E-8	0.000444	0.0612	0.827	0.267
F2323	N	Powder River Peninsula normal fault, OR-ID	C	Personius et al., 2003 (713; Powder R. Penin. fau	<0.13		~12	<0.015	0.000323	0.00124	0.00544	0.00546	0.0108	0.00314
F2323	N	Powder River Peninsula normal fault, OR-ID	C	USGS Q. F. F. D., 2005.01 (713; Powder R. Penin.	.005-.075		~12		0.000454	0.00332	0.00345	0.00354	0.00724	0.00178
F2323	N	Powder River Peninsula normal fault, OR-ID	S	combined offset rate (2 GCN data)					0.000388	0.00332	0.00437	0.06	0.48	0.193
F2323	L	Powder River Peninsula sinistral fault, OR-ID	S	combined offset rate (0 GCN data)					0.00356	0.00356	2.23	4.33	15.4	4.56
F0586	N	Quinn normal fault, 41-42N, 117W, NV-OR	C	Stewart, 1978	2-5		13-11		0.128	0.289	0.292	0.293	0.465	0.0857
F0586	N	Quinn normal fault, 41-42N, 117W, NV-OR	C	Stewart, 1998 (scarp height only)	0.6-1.5		15	5	6.89E-6	1.5E-6	0.000189	0.000274	0.00102	0.000276
F0586	N	Quinn normal fault, 41-42N, 117W, NV-OR	C	Personius et al., 2003 (1507a)	1.85-3.1		17-15	<0.75	0.103	0.154	0.155	0.155	0.209	0.0271
F0586	N	Quinn normal fault, 41-42N, 117W, NV-OR	S	combined offset rate (3 GCN data)					9.85E-6	9.99E-7	0.000313	0.053	0.371	0.132
F0676	N	Quinn R. sec., Santa Rosa Range n. f., NV-OR	C	Stewart, 1978	2-5		12.5-8		0.147	0.33	0.342	0.349	0.586	0.111
F0676	N	Quinn R. sec., Santa Rosa Range n. f., NV-OR	S	combined offset rate (1 GCN data)					0.000693	0.00177	0.304	0.305	0.715	0.247
F1699	L	sinistral fault, offshore OR	C	Personius et al., 2003 (not mapped)				>1.6?	0.0000188	2.35E-6	0.000572	0.000947	0.00405	0.00111
F1699	L	sinistral fault, offshore OR	S	combined offset rate (1 GCN data)					0.0000223	2.86E-7	0.000743	0.629	8.58	2.31
F1701	L	sinistral fault, offshore OR	C	Personius et al., 2002 (not mapped)				>1.6?	0.0000188	2.35E-6	0.000572	0.000947	0.00405	0.00111
F1701	L	sinistral fault, offshore OR	S	combined offset rate (1 GCN data)					0.0000223	2.86E-7	0.000743	0.629	8.58	2.31
F1960	R	Sisters dextral(?) fault zone, OR	S	combined offset rate (0 GCN data)					0.0381	0.00713	6.18	11.6	42.8	12.6
F1960	N	Sisters normal fault zone, OR	C	Personius et al., 2003 (852; neotectonic rate)	0.040		3.0-2.4	<0.13	0.00942	0.0139	0.0141	0.0141	0.0192	0.00252
F1960	N	Sisters normal fault zone, OR	C	Personius et al., 2003 (852; neotectonic rate)	0.012-.015		0.73-0.12	<0.13	0.0161	0.0215	0.0318	0.04	0.103	0.0232
F1960	N	Sisters normal fault zone, OR	S	combined offset rate (2 GCN data)					0.011	0.0167	0.0168	0.0241	0.0766	0.0609
F1957	N	Sky Lakes normal fault, OR	C	Pezzopane and Weldon, 1993 (neotectonic rate)	<2		1.8	0	0.0282	0.0075	0.558	0.591	1.37	0.375
F1957	N	Sky Lakes normal fault, OR	C	Personius et al., 2003 (844)	0.3		2-0.73	<0.015	0.103	0.169	0.214	0.23	0.43	0.0876
F1957	N	Sky Lakes normal fault, OR	C	USGS Quaternary Fault & Fold Database, 2005.01	0.3		2-0.73		0.103	0.169	0.214	0.23	0.43	0.0876
F1957	N	Sky Lakes normal fault, OR	S	combined offset rate (3 GCN data)					0.111	0.169	0.198	0.219	0.41	0.102
F2329	T	South Slough-Winchester thrust faults, OR	C	USGS Q. F. & F. D., 2005.01 (890; dip 20-75)	.006-.025		0.2?	0	0.00777	0.0855	0.093	0.122	0.319	0.764
F2329	T	South Slough-Winchester thrust faults, OR	C	USGS Q. F. & F. D., 2005.01 (890; dip 20-75)	.050		0.2?	0	0.17	0.245	0.29	0.382	0.912	1.38
F2329	T	South Slough-Winchester thrust faults, OR	C	USGS Q. F. & F. D., 2005.01 (890; dip 20-75)	.012		0.125	0	0.0866	0.102	0.113	0.161	0.363	1.06
F2329	T	South Slough-Winchester thrust faults, OR	C	USGS Q. F. & F. D., 2005.01 (890; dip 20-75)	.019		0.105	0	0.173	0.19	0.217	0.341	0.89	1.81
F2329	T	South Slough-Winchester thrust faults, OR	C	USGS Q. F. & F. D., 2005.01 (890; dip 20-75)	.004-.005		.08	0	0.0196	0.0855	0.0917	0.177	0.547	1.63
F2329	T	South Slough-Winchester thrust faults, OR	C	USGS Q. F. & F. D., 2005.01 (890; dip 20-75)	~.019?		.08	0	0.22	0.255	0.3	0.56	1.81	2.91
F2329	T	South Slough-Winchester thrust faults, OR	S	combined offset rate (6 GCN data)					0.193	0.227	0.222	0.225	0.274	0.0201
F1965	N	Southeast Newberry normal fault zone, OR	A	Pezzopane and Weldon, 1993 (neotectonic rate)	0.010		0.1-0.02	0	0.0201	0.0918	0.146	0.194	0.639	0.166
F1965	N	Southeast Newberry normal fault zone, OR	S	combined offset rate (1 GCN data)					0.0151	2.94E-7	0.147	0.196	0.651	0.178
F1961	N	Southwest Newberry normal fault, OR	S	combined offset rate (0 GCN data)					0.000304	0.00102	0.183	0.25	1.09	0.343
F2361	T	Stonewall Bank fault/anticline, offshore OR	C	Personius et al., 2003 (786, neotectonic rate)	.010-.013		.012-.011?	0	0.762	0.998	1	1	1.25	0.123
F2361	T	Stonewall Bank fault/anticline, offshore OR	S	combined offset rate (1 GCN data)					0.0247	4.16E-8	0.987	0.936	1.33	0.329
F2362	L	Thompson Ridge sinistral fault, offshore OR	S	combined offset rate (0 GCN data)					0.00356	0.00356	2.23	4.33	15.4	4.56
F1697	L	Tillamook Bay sinistral fault, offshore OR	S	combined offset rate (0 GCN data)					0.00356	0.00356	2.23	4.33	15.4	4.56
F2163	N	Tule Springs Rims normal fault, OR	C	Personius et al., 2003 (858)	0.35-1.3		12?	<0.75	0.0189	0.0685	0.0689	0.0692	0.121	0.0261
F2163	N	Tule Springs Rims normal fault, OR	S	combined offset rate (1 GCN data)					0.000634	0.00199	0.0773	0.155	0.731	0.254
F2356	N	unnamed Catlow Valley normal fault, OR	C	Personius et al., 2003 (824a)	>0.45		17-15	<1.6	0.0367	0.0418	0.269	0.331	1.27	0.362
F2356	N	unnamed Catlow Valley normal fault, OR	S	combined offset rate (1 GCN data)					0.000557	1.17E-7	0.233	0.287	1.18	0.354
F1964	N	Viewpoint normal fault, OR	S	combined offset rate (0 GCN data)					0.000304	0.00102	0.183	0.25	1.09	0.343
F2326	N	Waldport normal(?) fault, OR	C	Personius et al., 2003 (886)	0.015-.020		0.125	<0.125	0.115	0.142	0.162	0.225	0.515	1.23
F2326	N	Waldport normal(?) fault, OR	S	combined offset rate (1 GCN data)					0.00323	2.29E-6	0.162	0.228	0.625	1.14
F0582	N	Walker Rim normal f., E. Chemult graben, OR	C	Pezzopane and Weldon, 1993 (neotectonic rate)	<2		1.8	0	0.0282	0.0075	0.558	0.591	1.37	0.375
F0582	N	Walker Rim normal f., E. Chemult graben, OR	C	Stewart, 1998 (scarp height only)	0.6-1.5		16-7	<4	0.0376	0.0812	0.0913	0.0967	0.183	0.0372
F0582	N	Walker Rim normal f., E. Chemult graben, OR	C	Personius et al., 2003 (839b)	>0.3		7-4.5	<0.75	0.0564	0.0707	0.281	0.362	1.37	0.385
F0582	N	Walker Rim normal f., E. Chemult graben, OR	C	USGS Quaternary Fault & Fold Datab., 2005.01 (839	>0.3		7-4.5		0.0564	0.0707	0.281	0.362	1.37	0.385
F0582	N	Walker Rim normal f., E. Chemult graben, OR	S	combined offset rate (4 GCN data)					0.0532	0.0742	0.0844	0.0956	0.196	0.0432
F2327	N	Wallowa normal fault, OR	C	Personius et al., 2003 (801)	>2.2		15.7-13.7	0.7-0.14	0.000081	0.0000387	0.00233	0.00385	0.0167	0.00466
F2327	N	Wallowa normal fault, OR	S	combined offset rate (1 GCN data)					0.0000908	0.0000258	0.00276	0.0396	0.399	0.157
F1700	L	Wecoma sinistral fault, offshore OR	B	Goldfinger et al., 1992 (neotectonic rate)	5-6		0.6	0	7.56	9.09	9.22	9.3	11.4	0.993
F1700	L	Wecoma sinistral fault, offshore OR	S	combined offset rate (1 GCN data)					1.09	4.57E-7	9.14	8.83	11.7	2.23
F0575	N	West Baker Valley normal fault, OR	C	Pezzopane and Weldon, 1993 (neotectonic rate)	<1.6		<~1.2	0	0.0664	1.05	1.33	3.77	24	11.7
F0575	N	West Baker Valley normal fault, OR	C	Stewart, 1998 (scarp height only)	0.6-1.5		16-7	<4	0.0376	0.0812	0.0913	0.0967	0.183	0.0372
F0575	N	West Baker Valley normal fault, OR	S	combined offset rate (2 GCN data)					0.0273	0.0771	0.134	1.57	10.2	7.62
F2328	N	West Chemult Graben normal fault, OR	C	USGS Quaternary Fault & Fold Datab., 2005.01 (839	.005-.006		0.015	0	0.128	0.382	0.376	0.372	0.601	0.11
F2328	N	West Chemult Graben normal fault, OR	S	combined offset rate (1 GCN data)					0.00272	0.00194	0.366	0.354	0.624	0.171
F1672	N	West Goose Lake graben normal fault, OR	C	Stewart, 1998 (scarp height only)	0.6-1.5		<14	<4	0.0575	0.0855	0.152	0.594	2.93	4.07
F1672	N	West Goose Lake graben normal fault, OR	S	combined offset rate (1 GCN data)					0.000592	2.29E-6	0.161	0.418	1.77	2.86
F1970	N	West Grande Ronde Valley normal fault, OR	S	combined offset rate (0 GCN data)					0.000304	0.00102	0.183	0.25	1.09	0.343
F2353	N	West Guano Valley normal fault, OR	C	Personius et al., 2003 (826)	~0.15		5	<1.6	0.0247	0.0294	0.03	0.0303	0.0377	0.00331
F2353	N	West Guano Valley normal fault, OR	S	combined offset rate (1 GCN data)					0.00114	0.0295	0.0307	0.089	0.518	0.202
F0584	N	West Klamath Lake normal fault, OR	S	combined offset rate (0 GCN data)					0.000304	0.00102	0.183	0.25	1.09	0.343
F1360	R	Whaleshead dextral fault, OR	A	Bourgeois and Dott, 1985	~200-~1000		<~72		2.98	10.7	16.3	28.1	U	33.5
F1360	R	Whaleshead dextral fault, OR	S	combined offset rate (1 GCN data)					0.121	2.29E-6	12.8	19.5	96.7	26.2
F0596	N	Winter Rim normal fault system, OR	C	Stewart, 1978	2-5		13-11		0.128	0.289	0.292	0.293	0.465	0.0857
F0596	N	Winter Rim normal fault system, OR	A	Pezzopane and Weldon, 1993 (neotectonic rate)	0.006-0.01		~0.016	0	0.221	0.509	0.505	0.503	0.769	0.135
F0596	N	Winter Rim normal fault system, OR	S	combined offset rate (2 GCN data)					0.179	0.376	0.405	0.42	0.716	0.141
F2330	T	Yaquina Bay reverse(?) fault, OR	C	Personius et al., 2003 (885; neotectonic rate)	0.075		0.125	<0.08	0.599	0.613	0.699	0.951	2.25	2.63
F2330	T	Yaquina Bay reverse(?) fault, OR	C	Personius et al., 2003 (885; neotectonic rate)	0.0016		0.08	<0.08	0.00152	0.0285	0.0305	0.0464	0.113	0.606
F2330	T	Yaquina Bay reverse(?) fault, OR	S	combined offset rate (2 GCN data)					0.0117	0.612	0.649	0.652	1.23	0.998
F2330	L	Yaquina Bay sinistral(?) fault, OR	C	USGS Q. F. & F. D., 2006.04 (885; sense T? + L?)	0.075		~0.125	0	0.571	0.627	0.703	0.951	2.25	2.63
F2330	L	Yaquina Bay sinistral(?) fault, OR	S	combined offset rate (1 GCN data)					0.514	0.627	0.724	1.44	9.39	3.22
F2393	N	Acala normal fault, TX	S	combined offset rate (0 GCN data)					0.000304	0.00102	0.183	0.25	1.09	0.343
F0009	N	Arroyo Diablo n.f. W f Bluff M., Quitman Mts., TX	A	Huffington, 1943	0.4		28.6		0.0106	0.014	0.014	0.014	0.0174	0.00175
F0009	N	Arroyo Diablo n.f. W f Bluff M., Quitman Mts., TX	C	Keller et al., 1990			10	3	0.0000115	1.37E-6	0.000317	0.000466	0.00176	0.00048
F0009	N	Arroyo Diablo n.f. W f Bluff M., Quitman Mts., TX	C	Christiansen and Yeats, 1992			28-23	17	2.02E-6	3.1E-7	0.0000554	0.0000799	0.000295	0.0000797
F0009	N	Arroyo Diablo n.f. W f Bluff M., Quitman Mts., TX	S	combined offset rate (3 GCN data)					2.37E-6	2.08E-7	0.0000712	0.00589	0.0135	0.0576
F0850	N	Artillery Mt.-Clint-Amargosa n. f., NM-TX-Chih.	S	combined offset rate (0 GCN data)					0.000304	0.00102	0.183	0.25	1.09	0.343
F1379	N	East Baylor Mt.-Carrizo Mt. normal fault, TX	C	Keller et al., 1990			10	3	0.0000115	1.37E-6	0.000317	0.000466	0.00176	0.00048
F1379	N	East Baylor Mt.-Carrizo Mt. normal fault, TX	C	Christiansen and Yeats, 1992			28-23	17	2.02E-6	3.1E-7	0.0000554	0.0000799	0.000295	0.0000797
F1379	N	East Baylor Mt.-Carrizo Mt. normal fault, TX	S	combined offset rate (2 GCN data)					2.1E-6	2.08E-7	0.0000582	0.00539	0.0014	0.0613
F0755	N	East Flat Top Mountain normal fault, TX	C	Keller et al., 1990			10	3	0.0000115	1.37E-6	0.000317	0.000466	0.00176	0.00048
F0755	N	East Flat Top Mountain normal fault, TX	C	Christiansen and Yeats, 1992			28-23	17	2.02E-6	3.1E-7	0.0000554	0.0000799	0.000295	0.0000797
F0755	N	East Flat Top Mountain normal fault, TX	S	combined offset rate (2 GCN data)					2.1E-6	2.08E-7	0.0000582	0.00539	0.0014	0.0613
F0758	N	normal fault, 30-31N, 104W, TX	C	Keller et al., 1990			10	3	0.0000115	1.37E-6	0.000317	0.000466	0.00176	0.00048
F0758	N	normal fault, 30-31N, 104W, TX	C	Christiansen and Yeats, 1992			28-23	17	2.02E-6	3.1E-7	0.0000554	0.0000799	0.000295	0.0000797
F0758	N	normal fault, 30-31N, 104W, TX	S	combined offset rate (2 GCN data)					2.1E-6	2.08E-7	0.0000582	0.00539	0.0014	0.0613
F0757	N	normal fault, 30-31N, 105-104W, TX	C	Christiansen and Yeats, 1992			28-23	17	2.02E-6	3.1E-7	0.0000554	0.0000799	0.000295	0.0000797
F0757	N	normal fault, 30-31N, 105-104W, TX	S	combined offset rate (1 GCN data)					2.45E-6	2.08E-7	0.0000702	0.0364	0.399	0.157
F0817	N	normal fault, 30-32N, 106-107W, Chih.-TX	B	Seager et al., 1984			9	3	0.0000115	1.37E-6	0.000317	0.000466	0.00176	0.00048
F0817	N	normal fault, 30-32N, 106-107W, Chih.-TX	C	Keller et al., 1990			10	3	0.0000115	1.37E-6	0.000317	0.000466	0.00176	0.00048
F0817	N	normal fault, 30-32N, 106-107W, Chih.-TX	S	combined offset rate (2 GCN data)					6.53E-6	8.16E-8	0.000182	0.00369	0.0014	0.0494
F0756	N	normal fault, 31N, 104W, TX	C	Christiansen and Yeats, 1992			28-23	17	2.02E-6	3.1E-7	0.0000554	0.0000799	0.000295	0.0000797
F0756	N	normal fault, 31N, 104W, TX	S	combined offset rate (1 GCN data)					2.45E-6	2.08E-7	0.0000702	0.0364	0.399	0.157
F0408	N	Rim Rock-West Eagle Mts.-Red Hills n. f., TX	B	Gries and Haenggi, 1970			<35	>18	8.36E-7	9.7E-8	0.000025	0.0000409	0.000173	0.0000474
F0408	N	Rim Rock-West Eagle Mts.-Red Hills n. f., TX	C	Keller et al., 1990			10	3	0.0000115	1.37E-6	0.000317	0.000466	0.00176	0.00048
F0408	N	Rim Rock-West Eagle Mts.-Red Hills n. f., TX	C	Christiansen and Yeats, 1992			28-23	17	2.02E-6	3.1E-7	0.0000554	0.0000799	0.000295	0.0000797
F0408	N	Rim Rock-West Eagle Mts.-Red Hills n. f., TX	S	combined offset rate (3 GCN data)					6.88E-7	8.16E-8	0.0000179	0.000531	0.000154	0.0189
F1377	N	Sierra Diablo n. f., TX	C	Keller et al., 1990			10	3	0.0000115	1.37E-6	0.000317	0.000466	0.00176	0.00048
F1377	N	Sierra Diablo n. f., TX	C	Christiansen and Yeats, 1992			28-23	17	2.02E-6	3.1E-7	0.0000554	0.0000799	0.000295	0.0000797
F1377	N	Sierra Diablo n. f., TX	S	combined offset rate (2 GCN data)					2.1E-6	2.08E-7	0.0000582	0.00539	0.0014	0.0613
F2335	N	Bear River normal fault, UT-WY	S	combined offset rate (0 GCN data)					0.000304	0.00102	0.183	0.25	1.09	0.343
F0504	D	East Cache listric normal fault, UT-ID	C	Loring, 1976				~4-1.6	0.0000139	1.27E-6	0.000389	0.00059	0.00232	0.000633
F0504	D	East Cache listric normal fault, UT-ID	S	combined offset rate (1 GCN data)					0.0000168	5.71E-7	0.000497	0.571	4.69	3.16
F2331	N	East Joes Valley normal fault, UT	S	combined offset rate (0 GCN data)					0.000304	0.00102	0.183	0.25	1.09	0.343
F0569	N	Eastern Bear Lake normal fault, ID-UT	S	combined offset rate (0 GCN data)					0.000304	0.00102	0.183	0.25	1.09	0.343
F0611	N	House Range normal fault, UT	C	Stewart, 1978	2-5		13-11		0.128	0.289	0.292	0.293	0.465	0.0857
F0611	N	House Range normal fault, UT	S	combined offset rate (1 GCN data)					0.000638	0.00198	0.268	0.273	0.731	0.245
F0492	N	Hurricane-Paragona normal fault, UT-AZ	C	Stewart, 1978	6		13-11		0.404	0.496	0.5	0.502	0.611	0.0529
F0492	N	Hurricane-Paragona normal fault, UT-AZ	S	combined offset rate (1 GCN data)					0.000638	8.16E-8	0.45	0.382	0.732	0.271
F1345	D	listric n. f. of E Great Salt Lake basin, UT	B	Constenius, 1996 (shorter fault trace)	~2		39	0	0.0262	0.0513	0.0513	0.0513	0.0765	0.0128
F1345	D	listric n. f. of E Great Salt Lake basin, UT	S	combined offset rate (1 GCN data)					0.0303	0.0512	0.362	2.27	21.8	5.95
F1344	D	listric n. f. of W Great Salt Lake basin, UT	B	Constenius, 1996 (fault trace)	>10		39	0	0.322	0.494	1.55	4.36	32.3	7.75
F1344	D	listric n. f. of W Great Salt Lake basin, UT	S	combined offset rate (1 GCN data)					0.0536	0.0472	1.32	4.11	31.4	7.58
F1347	D	Morgan Valley-Huntsville listric normal fault, UT	A	Constenius, 1996	>3.7		39	0	0.295	0.491	1.43	4.25	31.8	7.66
F1347	D	Morgan Valley-Huntsville listric normal fault, UT	S	combined offset rate (1 GCN data)					0.0555	0.0429	1.29	4.08	31.2	7.55
F0414	N	N normal fault of Browns Park graben, CO-UT	B	Weber, 1971			5.3	1.6	0.0000215	5.54E-6	0.000588	0.000848	0.00313	0.000846
F0414	N	N normal fault of Browns Park graben, CO-UT	S	combined offset rate (1 GCN data)					0.0000237	4.44E-6	0.00067	0.0243	0.332	0.128
F0608	N	normal f E of Deep Crk Rng, 39-40N, 113W, UT	C	Stewart, 1978	2-5		13-11		0.128	0.289	0.292	0.293	0.465	0.0857
F0608	N	normal f E of Deep Crk Rng, 39-40N, 113W, UT	S	combined offset rate (1 GCN data)					0.000638	0.00198	0.268	0.273	0.731	0.245
F1343	N	normal fault E of Juab Valley, UT	S	combined offset rate (0 GCN data)					0.000304	0.00102	0.183	0.25	1.09	0.343
F0516	N	normal fault on W side of Sevier Plateau, UT	C	Loring, 1976			16.6	1.6	0.0000215	5.54E-6	0.000588	0.000848	0.00313	0.000846
F0516	N	normal fault on W side of Sevier Plateau, UT	S	combined offset rate (1 GCN data)					0.000025	4.44E-6	0.000725	0.037	0.399	0.157
F0514	N	normal fault on W side of Stansbury Range, UT	C	Loring, 1976			16.6	1.6	0.0000215	5.54E-6	0.000588	0.000848	0.00313	0.000846
F0514	N	normal fault on W side of Stansbury Range, UT	C	Stewart, 1978	2-5		13-11		0.128	0.289	0.292	0.293	0.465	0.0857
F0514	N	normal fault on W side of Stansbury Range, UT	S	combined offset rate (2 GCN data)					0.0000287	4.44E-6	0.000778	0.0403	0.381	0.134
F0614	N	normal fault, 38-39N, 113-112W, UT	C	Stewart, 1978	2-5		13-11		0.128	0.289	0.292	0.293	0.465	0.0857
F0614	N	normal fault, 38-39N, 113-112W, UT	S	combined offset rate (1 GCN data)					0.000638	0.00198	0.268	0.273	0.731	0.245
F0615	N	normal fault, 38N, 112W, UT	C	Stewart, 1978	2-5		13-11		0.128	0.289	0.292	0.293	0.465	0.0857
F0615	N	normal fault, 38N, 112W, UT	S	combined offset rate (1 GCN data)					0.000638	0.00198	0.268	0.273	0.731	0.245
F0612	N	normal fault, 38N, 113W, UT	C	Stewart, 1978	2-5		13-11		0.128	0.289	0.292	0.293	0.465	0.0857
F0612	N	normal fault, 38N, 113W, UT	S	combined offset rate (1 GCN data)					0.000638	0.00198	0.268	0.273	0.731	0.245
F0613	N	normal fault, 38N, 113W, UT	C	Stewart, 1978	2-5		13-11		0.128	0.289	0.292	0.293	0.465	0.0857
F0613	N	normal fault, 38N, 113W, UT	S	combined offset rate (1 GCN data)					0.000638	0.00198	0.268	0.273	0.731	0.245
F0602	N	normal fault, 39-40N, 112W, UT	C	Stewart, 1978	2-5		13-11		0.128	0.289	0.292	0.293	0.465	0.0857
F0602	N	normal fault, 39-40N, 112W, UT	S	combined offset rate (1 GCN data)					0.000638	0.00198	0.268	0.273	0.731	0.245
F0609	N	normal fault, 39-40N, 113W, UT	C	Stewart, 1978	2-5		13-11		0.128	0.289	0.292	0.293	0.465	0.0857
F0609	N	normal fault, 39-40N, 113W, UT	S	combined offset rate (1 GCN data)					0.000638	0.00198	0.268	0.273	0.731	0.245
F0601	N	normal fault, 39N, 112W, UT	C	Stewart, 1978	2-5		13-11		0.128	0.289	0.292	0.293	0.465	0.0857
F0601	N	normal fault, 39N, 112W, UT	S	combined offset rate (1 GCN data)					0.000638	0.00198	0.268	0.273	0.731	0.245
F0610	N	normal fault, 39N, 113W, UT	C	Stewart, 1978	2-5		13-11		0.128	0.289	0.292	0.293	0.465	0.0857
F0610	N	normal fault, 39N, 113W, UT	S	combined offset rate (1 GCN data)					0.000638	0.00198	0.268	0.273	0.731	0.245
F0606	N	normal fault, 40-41N, 112W, UT	C	Stewart, 1978	2-5		13-11		0.128	0.289	0.292	0.293	0.465	0.0857
F0606	N	normal fault, 40-41N, 112W, UT	S	combined offset rate (1 GCN data)					0.000638	0.00198	0.268	0.273	0.731	0.245
F0607	N	normal fault, 40N, 112W, UT	C	Stewart, 1978	2-5		13-11		0.128	0.289	0.292	0.293	0.465	0.0857
F0607	N	normal fault, 40N, 112W, UT	S	combined offset rate (1 GCN data)					0.000638	0.00198	0.268	0.273	0.731	0.245
F0605	N	normal fault, 41N, 113W, UT	C	Stewart, 1978	2-5		13-11		0.128	0.289	0.292	0.293	0.465	0.0857
F0605	N	normal fault, 41N, 113W, UT	S	combined offset rate (1 GCN data)					0.000638	0.00198	0.268	0.273	0.731	0.245
F0506	N	normal faults in Cedar Valley, UT	S	combined offset rate (0 GCN data)					0.000304	0.00102	0.183	0.25	1.09	0.343
F0486	N	normal faults in Oquirrh Mountains, UT	S	combined offset rate (0 GCN data)					0.000304	0.00102	0.183	0.25	1.09	0.343
F0604	N	North Promontory normal fault, UT	C	Stewart, 1978	2-5		13-11		0.128	0.289	0.292	0.293	0.465	0.0857
F0604	N	North Promontory normal fault, UT	S	combined offset rate (1 GCN data)					0.000638	0.00198	0.268	0.273	0.731	0.245
F0603	N	Oquirrh normal fault, UT	C	Stewart, 1978	2-5		13-11		0.128	0.289	0.292	0.293	0.465	0.0857
F0603	N	Oquirrh normal fault, UT	S	combined offset rate (1 GCN data)					0.000638	0.00198	0.268	0.273	0.731	0.245
F0600	N	Paunsaugunt normal fault, UT	C	Stewart, 1978	2-5		13-11		0.128	0.289	0.292	0.293	0.465	0.0857
F0600	N	Paunsaugunt normal fault, UT	S	combined offset rate (1 GCN data)					0.000638	0.00198	0.268	0.273	0.731	0.245
F0415	N	S normal fault of Browns Park graben, CO-UT	B	Izett, 1975	1.5		9		0.147	0.166	0.167	0.167	0.19	0.0109
F0415	N	S normal fault of Browns Park graben, CO-UT	S	combined offset rate (1 GCN data)					0.000852	8.16E-8	0.167	0.197	0.603	0.209
F0907	D	Sevier Desert detachment, UT	A	Otton, 1995; 1996 (last part of slip history)	>6		13-12		0.49	0.531	2.03	4.9	33.9	8.14
F0907	D	Sevier Desert detachment, UT	S	combined offset rate (1 GCN data)					0.0669	0.0429	1.73	4.53	32.8	7.89
F0515	N	Sevier normal fault, AZ-UT (see F1262N)	C	Loring, 1976			16.6	1.6	0.0000215	5.54E-6	0.000588	0.000848	0.00313	0.000846
F0515	N	Sevier normal fault, AZ-UT (see F1262N)	C	Stewart, 1978	2-5		13-11		0.128	0.289	0.292	0.293	0.465	0.0857
F0515	N	Sevier normal fault, AZ-UT (see F1262N)	C	USGS Q. Fault & Fold D., 2006 (997a, N. part Sevi	0.2		0.56	0	0.183	0.36	0.36	0.36	0.537	0.0902
F0515	N	Sevier normal fault, AZ-UT (see F1262N)	S	combined offset rate (2* GCN data)					0.0742	0.00198	0.331	0.331	0.515	0.121
F2333	N	Strawberry normal fault, UT	C	USGS Q. Fault & Fold D., 2006 (2412)	>0.009		0.3~0.15	0	0.0424	0.0566	0.265	0.362	1.42	0.422
F2333	N	Strawberry normal fault, UT	S	combined offset rate (1 GCN data)					0.00306	3.03E-7	0.256	0.346	1.38	0.413
F0505	D	Wasatch listric normal fault, UT-ID	C	Stewart, 1978 [throw]	6		13-11		0.404	0.496	0.5	0.502	0.611	0.0529
F0505	D	Wasatch listric normal fault, UT-ID	A	Machette et al., 1991 (neotectonic rate, fast sec	~.006~.009		0.006	0	0.479	1.26	1.27	1.27	2.09	0.391
F0505	D	Wasatch listric normal fault, UT-ID	A	McCalpin et al., 1994 (neotectonic rate)	0.010-0.014		0.013	0	0.522	0.924	0.927	0.928	1.34	0.2
F0505	D	Wasatch listric normal fault, UT-ID	S	combined offset rate (3 GCN data)					0.444	0.533	0.626	0.769	1.33	0.368
F2332	N	West Joes Valley normal fault, UT	C	USGS Q. Fault & Fold Data Base (2453)	0.012		.03~.012	0	0.302	0.467	0.567	0.602	1.04	0.2
F2332	N	West Joes Valley normal fault, UT	S	combined offset rate (1 GCN data)					0.00302	0.00196	0.532	0.551	1.04	0.258
F2334	N	West Valley normal fault, UT	S	combined offset rate (0 GCN data)					0.000304	0.00102	0.183	0.25	1.09	0.343
F1974	R	Arlington-Shuttler Butte dextral fault, WA	C	Personius et al., 2003 (not mapped)				>1.8?	0.0000167	2.06E-6	0.000509	0.000842	0.0036	0.00099
F1974	R	Arlington-Shuttler Butte dextral fault, WA	S	combined offset rate (1 GCN data)					0.0000202	5.71E-7	0.000662	1.68	23.9	6.29
F2396	T	Devils Mountain thrust/sinistral fault, BC-WA	C	USGS Quaternary Fault & Fold Database, 2006 (574)	.0045~.024		~0.08	0	0.0417	0.199	0.242	0.432	1.43	2.55
F2396	T	Devils Mountain thrust/sinistral fault, BC-WA	S	combined offset rate (1 GCN data)					0.0181	2.29E-6	0.241	0.448	1.86	2.37
F1978	T	Dow-Saddle Mountains thrust, WA	S	combined offset rate (0 GCN data)					0.000958	0.000519	0.228	0.544	2.41	0.691
F2349	T	Grays Harbor thrust(?) fault zone, offshore WA	A	McCrory et al., 2002 (neotectonic rate)	0.040		.02-.015?	0	1.32	2.08	2.11	2.12	2.99	0.437
F2349	T	Grays Harbor thrust(?) fault zone, offshore WA	S	combined offset rate (1 GCN data)					0.354	4.92E-8	2.08	2.05	2.99	0.552
F0550	N	Greenwood-Granby normal fault system, WA-BC	S	combined offset rate (0 GCN data)					0.000304	0.00102	0.183	0.25	1.09	0.343
F2397	R	Hood Canal dextral(?) fault zone, WA	S	combined offset rate (0 GCN data)					0.0381	0.00713	6.18	11.6	42.8	12.6
F2314	T	Horse Haven Hills anticline thrust fault, WA	S	combined offset rate (0 GCN data)					0.000958	0.000519	0.228	0.544	2.41	0.691
F1975	R	Kittias Valley dextral faults, WA	S	combined offset rate (0 GCN data)					0.0381	0.00713	6.18	11.6	42.8	12.6
F2316	R	Lacamas Lake dextral(?) fault, WA-OR	C	Weldon et al., 2003 (not mapped)				>1.6?	0.0000188	2.35E-6	0.000572	0.000947	0.00405	0.00111
F2316	R	Lacamas Lake dextral(?) fault, WA-OR	S	combined offset rate (1 GCN data)					0.0000226	5.71E-7	0.000745	1.68	23.9	6.29
F1977	T	Mill Creek-Toppenish Ridge thrust, WA	C	USGS Quaternary Fault & F. D., 2006 (566ab)	1.8		15	0	0.11	0.12	0.12	0.12	0.131	0.00522
F1977	T	Mill Creek-Toppenish Ridge thrust, WA	C	USGS Quaternary Fault & F. D., 2006 (566ab)	0.5		15-10.5	0	0.0294	0.0379	0.0392	0.0396	0.0515	0.00577
F1977	T	Mill Creek-Toppenish Ridge thrust, WA	S	combined offset rate (2 GCN data)					0.0132	0.0379	0.112	0.236	1.78	0.462
F2324	R	Rattlesnake-Wallula dextral fault, WA-OR	C	Weldon et al., 2003 (not mapped in OR)				>1.6?	0.0000188	2.35E-6	0.000572	0.000947	0.00405	0.00111
F2324	R	Rattlesnake-Wallula dextral fault, WA-OR	C	Personius et al., 2003 (846)	1		23.8-5.3	<0.015	0.0109	0.0544	0.07	0.0834	0.232	0.0563
F2324	R	Rattlesnake-Wallula dextral fault, WA-OR	S	combined offset rate (2 GCN data)					0.0000266	5.71E-7	0.000818	0.885	14.9	4.62
F2350	T	Saddle Hill fault zone, offshore-onshore WA	S	combined offset rate (0 GCN data)					0.000958	0.000519	0.228	0.544	2.41	0.691
F1976	T	Saddle Mountain thrust, WA	S	combined offset rate (0 GCN data)					0.000958	0.000519	0.228	0.544	2.41	0.691
F1951	T	Seattle thrust fault, WA	A	Johnson et al., 1994b	>8		~40	0	0.209	0.248	0.812	1.01	2.92	0.752
F1951	T	Seattle thrust fault, WA	S	combined offset rate (1 GCN data)					0.0106	1.14E-7	0.513	0.766	2.69	0.757
F1696	L	sinistral f. off Columbia River, offshore OR-WA	C	Personius et al., 2002 (not mapped)				>1.8?	0.0000167	2.06E-6	0.000509	0.000842	0.0036	0.00099
F1696	L	sinistral f. off Columbia River, offshore OR-WA	S	combined offset rate (1 GCN data)					0.0000199	2.86E-7	0.00066	0.629	8.58	2.31
F2337	T	South Whidbey Island thrust(?) fault, WA	C	USGS Quaternary Fault & Fold D., 2006 (572)	0.0025		.0034~.0029	0	0.293	0.817	0.815	0.803	1.26	0.221
F2337	T	South Whidbey Island thrust(?) fault, WA	S	combined offset rate (1 GCN data)					0.024	0.000792	0.802	0.766	1.43	0.345
F2398	L	Strawberry Point sinistral fault, WA	S	combined offset rate (0 GCN data)					0.00356	0.00356	2.23	4.33	15.4	4.56
F2399	L	Utsalady Point sinistral fault, WA	S	combined offset rate (0 GCN data)					0.00356	0.00356	2.23	4.33	15.4	4.56
F2348	R	Willapa Bay dextral(?) fault zone, WA	S	combined offset rate (0 GCN data)					0.0381	0.00713	6.18	11.6	42.8	12.6
F0935	N	Bear Creek normal fault, WY	A	Winterfeld and Conard, 1983	1		52	46	7.48E-7	1.06E-7	0.0000205	0.0000295	0.000109	0.0000294
F0935	N	Bear Creek normal fault, WY	S	combined offset rate (1 GCN data)					8.63E-7	8.16E-8	0.0000219	0.0108	0.118	0.0874
F0968	N	Cedar Ridge normal fault, WY [see also F0368T]	S	combined offset rate (0 GCN data)					0.000304	0.00102	0.183	0.25	1.09	0.343
F0360	N	Continental normal fault, WY	B	Hurrich, 1981	0.3		23.7	5.3	6.48E-6	1.53E-6	0.000177	0.000256	0.000943	0.000255
F0360	N	Continental normal fault, WY	S	combined offset rate (1 GCN data)					7.23E-6	1.23E-6	0.000204	0.0238	0.332	0.128
F2338	N	Eagle Bay normal fault, WY	C	USGS Quaternary Fault & Fold D., 2006 (757b)	>.005		~0.012	0	0.212	0.485	0.599	0.777	2.43	0.575
F2338	N	Eagle Bay normal fault, WY	C	USGS Quaternary Fault & Fold D., 2006 (757c)	0.3		0.63	0	0.321	0.476	0.476	0.476	0.632	0.0794
F2338	N	Eagle Bay normal fault, WY	S	combined offset rate (2 GCN data)					0.296	0.478	0.485	0.514	1.01	0.242
F2340	N	East Mount Sheridan normal fault, WY	C	USGS Quaternary Fault & Fold D., 2006 (766)	~0.6		0.630	0	0.796	0.952	0.952	0.952	1.11	0.0797
F2340	N	East Mount Sheridan normal fault, WY	C	USGS Quaternary Fault & Fold D., 2006 (766)	0.03		0.0135	0	1.45	2.23	2.23	2.23	3	0.394
F2340	N	East Mount Sheridan normal fault, WY	S	combined offset rate (2 GCN data)					0.791	0.995	1.01	1.13	2.56	0.457
F2339	N	East Yellowstone River normal fault, WY	C	USGS Q. Fault & F. D., 2006 (761, Upper Ye. Vly.	0.005		0.0135	0	0.109	0.378	0.378	0.378	0.639	0.127
F2339	N	East Yellowstone River normal fault, WY	S	combined offset rate (1 GCN data)					0.00262	0.00192	0.366	0.359	0.659	0.181
F0568	N	Grand Vly.-Swan Vly.-Star Vly. normal f., ID-WY	B	Armstrong and Oriel, 1965	2.1-3.0		57.8-36.6	0	0.0384	0.051	0.054	0.055	0.0757	0.00976
F0568	N	Grand Vly.-Swan Vly.-Star Vly. normal f., ID-WY	B	Pierce and Morgan, 1992 (total slip history)	4		4	2.3	0.0000149	3.7E-6	0.000409	0.000589	0.00217	0.000588
F0568	N	Grand Vly.-Swan Vly.-Star Vly. normal f., ID-WY	C	Stewart, 1998			6	5	6.89E-6	1.5E-6	0.000189	0.000274	0.00102	0.000276
F0568	N	Grand Vly.-Swan Vly.-Star Vly. normal f., ID-WY	C	USGS Q. Fault & F. D., 2006 (726c, GVf, Prater Mt				0.07	0.000487	0.000152	0.0129	0.0185	0.068	0.0184
F0568	N	Grand Vly.-Swan Vly.-Star Vly. normal f., ID-WY	S	combined offset rate (4 GCN data)					4.98E-6	1.48E-6	0.000132	0.000188	0.000688	0.000228
F1294	N	Grays River normal fault, WY	S	combined offset rate (0 GCN data)					0.000304	0.00102	0.183	0.25	1.09	0.343
F2400	N	Greys River normal fault, WY	C	USGS Quaternary Fault & Fold D., 2006 (728)	0.0093		~0.013	0	0.419	0.734	0.727	0.719	0.979	0.131
F2400	N	Greys River normal fault, WY	S	combined offset rate (1 GCN data)					0.003	0.00158	0.71	0.651	0.983	0.243
F0034	N	Hoback normal fault, WY	B	Dorr et al., 1977			11.2	3.4	0.0000101	2.44E-6	0.000276	0.000399	0.00147	0.000397
F0034	N	Hoback normal fault, WY	A	Hunter, 1988			<23.7	>1.6	8.86E-6	1.11E-6	0.000269	0.000446	0.0019	0.000524
F0034	N	Hoback normal fault, WY	C	USGS Quaternary Fault & Fold D., 2006 (772)	0.01		0.14	0	0.00623	0.0855	0.0896	0.115	0.279	0.767
F0034	N	Hoback normal fault, WY	S	combined offset rate (1* GCN data)					0.00163	2.29E-6	0.0919	0.134	0.468	0.723
F1313	N	Hogsback normal fault, WY-UT [see also F0768T]	S	combined offset rate (0 GCN data)					0.000304	0.00102	0.183	0.25	1.09	0.343
F0425	N	N. Granite Mts. normal fault, WY	A	Love, 1970	1.5?		23.7	5.3	6.48E-6	1.53E-6	0.000177	0.000256	0.000943	0.000255
F0425	N	N. Granite Mts. normal fault, WY	C	McGrew, 1971			5.3	1.6	0.0000215	5.54E-6	0.000588	0.000848	0.00313	0.000846
F0425	N	N. Granite Mts. normal fault, WY	A	Pekarek, 1974	0.3-0.9		11.2	5.3	6.48E-6	1.53E-6	0.000177	0.000256	0.000943	0.000255
F0425	N	N. Granite Mts. normal fault, WY	S	combined offset rate (3 GCN data)					3.09E-6	2.22E-6	0.0000822	0.000189	0.000465	0.00695
F0574	N	normal fault within Rawlins uplift, WY	A	Barlow, 1955	0.3		<23.7		0.0111	0.0152	0.0253	0.124	0.505	1.69
F0574	N	normal fault within Rawlins uplift, WY	S	combined offset rate (1 GCN data)					0.000585	2.29E-6	0.0464	0.19	0.931	1.2
F0424	N	Pathfinder normal fault, WY	A	Love, 1970	1		23.7	5.3	6.48E-6	1.53E-6	0.000177	0.000256	0.000943	0.000255
F0424	N	Pathfinder normal fault, WY	C	McGrew, 1971			5.3	1.6	0.0000215	5.54E-6	0.000588	0.000848	0.00313	0.000846
F0424	N	Pathfinder normal fault, WY	A	Pekarek, 1974	0.3-0.9		11.2	5.3	6.48E-6	1.53E-6	0.000177	0.000256	0.000943	0.000255
F0424	N	Pathfinder normal fault, WY	B	Sales, 1983			23.7	5.3	6.48E-6	1.53E-6	0.000177	0.000256	0.000943	0.000255
F0424	N	Pathfinder normal fault, WY	S	combined offset rate (4 GCN data)					2.08E-6	2.22E-6	0.0000538	0.0000776	0.000286	0.0000775
F2341	N	Rock Creek normal fault, WY	C	USGS Quaternary Fault & Fold D., 2006 (729)	0.011		>0.0115	0	0.139	0.324	0.47	0.502	0.999	0.24
F2341	N	Rock Creek normal fault, WY	S	combined offset rate (1 GCN data)					0.00301	0.00169	0.429	0.466	1	0.272
F0019	N	Teton normal fault, WY	B	Love, 1956	6		~4		1.13	1.46	1.5	1.52	2.06	0.237
F0019	N	Teton normal fault, WY	B	Love and Reed, 1968	4.6-6.1		9		0.474	0.591	0.594	0.596	0.729	0.065
F0019	N	Teton normal fault, WY	B	Pierce and Morgan, 1992	5		6-4		0.712	0.947	1	1.02	1.47	0.196
F0019	N	Teton normal fault, WY	A	Byrd et al., 1994 (neotectonic rate)	0.11-0.125		0.075-0.025	0	1.56	1.7	2.35	2.58	4.5	0.846
F0019	N	Teton normal fault, WY	C	USGS Q. Fault & F. D., 2006 (768a, Steamboat Mt.	0.0028		~0.015	0	0.0317	0.201	0.201	0.204	0.42	0.0922
F0019	N	Teton normal fault, WY	C	USGS Q. Fault & F. D., 2006 (768b, northern secti	.0057~.018		~0.015	0	0.229	0.794	0.795	0.797	1.38	0.292
F0019	N	Teton normal fault, WY	C	USGS Q. Fault & F. D., 2006 (768c, central sectio	.012~.03		~0.015	0	0.587	1.4	1.4	1.41	2.23	0.419
F0019	N	Teton normal fault, WY	C	USGS Q. Fault & F. D., 2006 (768d, southern secti	.014		~0.015	0	0.666	0.947	0.942	0.937	1.18	0.123
F0019	N	Teton normal fault, WY	C	USGS Q. Fault & F. D., 2006 (768e, Avalanche Cyn.	.0052~.007		~0.015	0	0.155	0.421	0.415	0.411	0.648	0.116
F0019	N	Teton normal fault, WY	S	combined offset rate (9 GCN data)					0.495	0.672	0.857	0.864	1.45	0.246
F2342	N	West Yellowstone River normal fault, WY	C	USGS Q. Fault & F. D., 2006 (761, Upper Ye. Vly.	0.005		0.0135	0	0.109	0.378	0.378	0.378	0.639	0.127
F2342	N	West Yellowstone River normal fault, WY	S	combined offset rate (1 GCN data)					0.00262	0.00192	0.366	0.359	0.659	0.181
